# Supplementary material for: Microbial Transformation of Yakuchinone A and Cytotoxicity Evaluation of Its Metabolites
Source: MDPI journal article supplement (doi:10.3390/ijms23073992), 2022-04-03
Supplement: s1 [file s1]

## Supplementary Material

### Microbial Transformation of Yakuchinone A and Cytotoxicity Evaluation of Its Metabolites

Chen Huo <sup>1,†</sup>, Fubo Han <sup>1,†</sup>, Yina Xiao <sup>1</sup>, Hyun Jung Kim <sup>2,\*</sup> and Ik-Soo Lee <sup>1,\*</sup>

<sup>1</sup> College of Pharmacy, Chonnam National University, Gwangju 61186, Korea; huochen\_0213@163.com (C.H.); hanfubo0306@gmail.com (F.H.); yogurtxiao@163.com (Y.X.)

<sup>2</sup> College of Pharmacy and Natural Medicine Research Institute, Mokpo National University, Muan, Jeonnam 58554, Korea

\* Correspondence: hyunkim@mokpo.ac.kr (H.J.K.); islee@chonnam.ac.kr (I.-S.L.); Tel.: +82-62-530-2932

† These authors contributed equally to this work.

|                                                                                                                                                                                       |    |
|---------------------------------------------------------------------------------------------------------------------------------------------------------------------------------------|----|
| <b>Table S1.</b> Twenty-two microorganisms were incubated for screening of yakuchinone A. ....                                                                                        | 5  |
| <b>Figure S1.</b> $\Delta\delta_{\text{H}}$ ( $=\delta_{\text{S}}-\delta_{\text{R}}$ ) values for the Mosher ester derivatives of <b>2</b> , <b>5</b> , <b>6</b> , and <b>7</b> ..... | 5  |
| <b>Figure S2.</b> $^1\text{H}$ -NMR ( $\text{CD}_3\text{OD}$ , 400 MHz) spectrum of yakuchinone A ( <b>1</b> ).....                                                                   | 6  |
| <b>Figure S3.</b> $^{13}\text{C}$ -NMR ( $\text{CD}_3\text{OD}$ , 100 MHz) spectrum of yakuchinone A ( <b>1</b> ).....                                                                | 6  |
| <b>Figure S4.</b> COSY spectrum of yakuchinone A ( <b>1</b> ). ....                                                                                                                   | 7  |
| <b>Figure S5.</b> HSQC spectrum of yakuchinone A ( <b>1</b> ). ....                                                                                                                   | 7  |
| <b>Figure S6.</b> HMBC spectrum of yakuchinone A ( <b>1</b> ). ....                                                                                                                   | 8  |
| <b>Figure S7.</b> $^1\text{H}$ -NMR ( $\text{CD}_3\text{OD}$ , 500 MHz) spectrum of <b>2</b> .....                                                                                    | 8  |
| <b>Figure S8.</b> $^{13}\text{C}$ -NMR ( $\text{CD}_3\text{OD}$ , 125 MHz) spectrum of <b>2</b> .....                                                                                 | 9  |
| <b>Figure S9.</b> COSY spectrum of <b>2</b> . ....                                                                                                                                    | 9  |
| <b>Figure S10.</b> HSQC spectrum of <b>2</b> . ....                                                                                                                                   | 10 |
| <b>Figure S11.</b> HMBC spectrum of <b>2</b> . ....                                                                                                                                   | 10 |
| <b>Figure S12.</b> HRFDMS spectrum of <b>2</b> .....                                                                                                                                  | 11 |
| <b>Figure S13.</b> $^1\text{H}$ -NMR ( $\text{DMSO}-d_6$ , 400 MHz) spectrum of <b>3</b> . ....                                                                                       | 12 |
| <b>Figure S14.</b> $^{13}\text{C}$ -NMR ( $\text{DMSO}-d_6$ , 100 MHz) spectrum of <b>3</b> . ....                                                                                    | 12 |
| <b>Figure S15.</b> COSY spectrum of <b>3</b> . ....                                                                                                                                   | 13 |
| <b>Figure S16.</b> HSQC spectrum of <b>3</b> . ....                                                                                                                                   | 13 |
| <b>Figure S17.</b> HMBC spectrum of <b>3</b> . ....                                                                                                                                   | 14 |
| <b>Figure S18.</b> HRFDMS spectrum of <b>3</b> .....                                                                                                                                  | 15 |
| <b>Figure S19.</b> $^1\text{H}$ -NMR ( $\text{DMSO}-d_6$ , 500 MHz) spectrum of <b>3a</b> . ....                                                                                      | 16 |
| <b>Figure S20.</b> $^{13}\text{C}$ -NMR ( $\text{DMSO}-d_6$ , 125 MHz) spectrum of <b>3a</b> . ....                                                                                   | 16 |
| <b>Figure S21.</b> HRFDMS spectrum of <b>3a</b> .....                                                                                                                                 | 17 |
| <b>Figure S22.</b> $^1\text{H}$ -NMR ( $\text{DMSO}-d_6$ , 500 MHz) spectrum of <b>3b</b> . ....                                                                                      | 18 |
| <b>Figure S23.</b> $^{13}\text{C}$ -NMR ( $\text{DMSO}-d_6$ , 125 MHz) spectrum of <b>3b</b> .....                                                                                    | 18 |
| <b>Figure S24.</b> COSY spectrum of <b>3b</b> . ....                                                                                                                                  | 19 |
| <b>Figure S25.</b> HSQC spectrum of <b>3b</b> . ....                                                                                                                                  | 19 |
| <b>Figure S26.</b> HMBC spectrum of <b>3b</b> . ....                                                                                                                                  | 20 |
| <b>Figure S27.</b> HRFDMS spectrum of <b>3b</b> . ....                                                                                                                                | 21 |
| <b>Figure S28.</b> $^1\text{H}$ -NMR ( $\text{CD}_3\text{OD}$ , 500 MHz) spectrum of <b>4</b> .....                                                                                   | 22 |
| <b>Figure S29.</b> $^{13}\text{C}$ -NMR ( $\text{CD}_3\text{OD}$ , 125 MHz) spectrum of <b>4</b> .....                                                                                | 22 |
| <b>Figure S30.</b> COSY spectrum of <b>4</b> . ....                                                                                                                                   | 23 |
| <b>Figure S31.</b> HSQC spectrum of <b>4</b> . ....                                                                                                                                   | 23 |
| <b>Figure S32.</b> HMBC spectrum of <b>4</b> . ....                                                                                                                                   | 24 |

|                                                                                                                         |    |
|-------------------------------------------------------------------------------------------------------------------------|----|
| <b>Figure S33.</b> HRFDMS spectrum of <b>4</b> .....                                                                    | 25 |
| <b>Figure S34.</b> $^1\text{H}$ -NMR ( $\text{CD}_3\text{OD}$ , 500 MHz) spectrum of <b>5</b> .....                     | 26 |
| <b>Figure S35.</b> $^{13}\text{C}$ -NMR ( $\text{CD}_3\text{OD}$ , 125 MHz) spectrum of <b>5</b> .....                  | 26 |
| <b>Figure S36.</b> COSY spectrum of <b>5</b> . ....                                                                     | 27 |
| <b>Figure S37.</b> HSQC spectrum of <b>5</b> . ....                                                                     | 27 |
| <b>Figure S38.</b> HMBC spectrum of <b>5</b> . ....                                                                     | 28 |
| <b>Figure S39.</b> HRFDMS spectrum of <b>5</b> .....                                                                    | 29 |
| <b>Figure S40.</b> $^1\text{H}$ -NMR ( $\text{CD}_3\text{OD}$ , 500 MHz) spectrum of <b>6</b> .....                     | 30 |
| <b>Figure S41.</b> $^{13}\text{C}$ -NMR ( $\text{CD}_3\text{OD}$ , 125 MHz) spectrum of <b>6</b> .....                  | 30 |
| <b>Figure S42.</b> COSY spectrum of <b>6</b> . ....                                                                     | 31 |
| <b>Figure S43.</b> HSQC spectrum of <b>6</b> . ....                                                                     | 31 |
| <b>Figure S44.</b> HMBC spectrum of <b>6</b> . ....                                                                     | 32 |
| <b>Figure S45.</b> HRFDMS spectrum of <b>6</b> .....                                                                    | 33 |
| <b>Figure S46.</b> $^1\text{H}$ -NMR ( $\text{CD}_3\text{OD}$ , 500 MHz) spectrum of <b>7</b> .....                     | 34 |
| <b>Figure S47.</b> $^{13}\text{C}$ -NMR ( $\text{CD}_3\text{OD}$ , 125 MHz) spectrum of <b>7</b> .....                  | 34 |
| <b>Figure S48.</b> COSY spectrum of <b>7</b> . ....                                                                     | 35 |
| <b>Figure S49.</b> HSQC spectrum of <b>7</b> . ....                                                                     | 35 |
| <b>Figure S50.</b> HMBC spectrum of <b>7</b> . ....                                                                     | 36 |
| <b>Figure S51.</b> HRFDMS spectrum of <b>7</b> .....                                                                    | 37 |
| <b>Figure S52.</b> $^1\text{H}$ -NMR ( $\text{CD}_3\text{OD}$ , 500 MHz) spectrum of <b>8</b> .....                     | 38 |
| <b>Figure S53.</b> $^{13}\text{C}$ -NMR ( $\text{CD}_3\text{OD}$ , 125 MHz) spectrum of <b>8</b> .....                  | 38 |
| <b>Figure S54.</b> COSY spectrum of <b>8</b> . ....                                                                     | 39 |
| <b>Figure S55.</b> HSQC spectrum of <b>8</b> . ....                                                                     | 39 |
| <b>Figure S56.</b> HMBC spectrum of <b>8</b> . ....                                                                     | 40 |
| <b>Figure S57.</b> HRFDMS spectrum of <b>8</b> .....                                                                    | 41 |
| <b>Figure S58.</b> $^1\text{H}$ -NMR ( $\text{CD}_3\text{OD}$ , 500 MHz) spectrum of <b>9</b> .....                     | 42 |
| <b>Figure S59.</b> $^{13}\text{C}$ -NMR ( $\text{CD}_3\text{OD}$ , 125 MHz) spectrum of <b>9</b> .....                  | 42 |
| <b>Figure S60.</b> COSY spectrum of <b>9</b> . ....                                                                     | 43 |
| <b>Figure S61.</b> HSQC spectrum of <b>9</b> . ....                                                                     | 43 |
| <b>Figure S62.</b> HMBC spectrum of <b>9</b> . ....                                                                     | 44 |
| <b>Figure S63.</b> HRFDMS spectrum of <b>9</b> .....                                                                    | 45 |
| <b>Figure S64.</b> $^1\text{H}$ -NMR (pyridine- $d_5$ , 500 MHz) spectrum of ( <i>S</i> )-MTPA ester of <b>2</b> . .... | 46 |
| <b>Figure S65.</b> COSY spectrum of ( <i>S</i> )-MTPA ester of <b>2</b> . ....                                          | 46 |

|                                                                                                                     |    |
|---------------------------------------------------------------------------------------------------------------------|----|
| <b>Figure S66.</b> $^1\text{H}$ -NMR (pyridine- $d_5$ , 500 MHz) spectrum of ( <i>R</i> )-MTPA ester of <b>2</b> .  | 47 |
| <b>Figure S67.</b> COSY spectrum of ( <i>R</i> )-MTPA ester of <b>2</b> .                                           | 47 |
| <b>Figure S68.</b> $^1\text{H}$ -NMR (pyridine- $d_5$ , 500 MHz) spectrum of ( <i>S</i> )-MTPA ester of <b>3a</b> . | 48 |
| <b>Figure S69.</b> NOE spectrum of ( <i>S</i> )-MTPA ester of <b>3a</b> .                                           | 48 |
| <b>Figure S70.</b> COSY spectrum of ( <i>S</i> )-MTPA ester of <b>3a</b> .                                          | 49 |
| <b>Figure S71.</b> $^1\text{H}$ -NMR (pyridine- $d_5$ , 500 MHz) spectrum of ( <i>R</i> )-MTPA ester of <b>3a</b> . | 49 |
| <b>Figure S72.</b> NOE spectrum of ( <i>R</i> )-MTPA ester of <b>3a</b> .                                           | 50 |
| <b>Figure S73.</b> COSY spectrum of ( <i>R</i> )-MTPA ester of <b>3a</b> .                                          | 50 |
| <b>Figure S74.</b> $^1\text{H}$ -NMR (pyridine- $d_5$ , 500 MHz) spectrum of ( <i>S</i> )-MTPA ester of <b>3b</b> . | 51 |
| <b>Figure S75.</b> NOE spectrum of ( <i>S</i> )-MTPA ester of <b>3b</b> .                                           | 51 |
| <b>Figure S76.</b> COSY spectrum of ( <i>S</i> )-MTPA ester of <b>3b</b> .                                          | 52 |
| <b>Figure S77.</b> $^1\text{H}$ -NMR (pyridine- $d_5$ , 500 MHz) spectrum of ( <i>R</i> )-MTPA ester of <b>3b</b> . | 52 |
| <b>Figure S78.</b> NOE spectrum of ( <i>R</i> )-MTPA ester of <b>3b</b> .                                           | 53 |
| <b>Figure S79.</b> COSY spectrum of ( <i>R</i> )-MTPA ester of <b>3b</b> .                                          | 53 |
| <b>Figure S80.</b> $^1\text{H}$ -NMR (pyridine- $d_5$ , 500 MHz) spectrum of ( <i>S</i> )-MTPA ester of <b>5</b> .  | 54 |
| <b>Figure S81.</b> COSY spectrum of ( <i>S</i> )-MTPA ester of <b>5</b> .                                           | 54 |
| <b>Figure S82.</b> $^1\text{H}$ -NMR (pyridine- $d_5$ , 500 MHz) spectrum of ( <i>R</i> )-MTPA ester of <b>5</b> .  | 55 |
| <b>Figure S83.</b> COSY spectrum of ( <i>R</i> )-MTPA ester of <b>5</b> .                                           | 55 |
| <b>Figure S84.</b> $^1\text{H}$ -NMR (pyridine- $d_5$ , 500 MHz) spectrum of ( <i>S</i> )-MTPA ester of <b>6</b> .  | 56 |
| <b>Figure S85.</b> COSY spectrum of ( <i>S</i> )-MTPA ester of <b>6</b> .                                           | 56 |
| <b>Figure S86.</b> $^1\text{H}$ -NMR (pyridine- $d_5$ , 500 MHz) spectrum of ( <i>R</i> )-MTPA ester of <b>6</b> .  | 57 |
| <b>Figure S87.</b> COSY spectrum of ( <i>R</i> )-MTPA ester of <b>6</b> .                                           | 57 |
| <b>Figure S88.</b> $^1\text{H}$ -NMR (pyridine- $d_5$ , 500 MHz) spectrum of ( <i>S</i> )-MTPA ester of <b>7</b> .  | 58 |
| <b>Figure S89.</b> COSY spectrum of ( <i>S</i> )-MTPA ester of <b>7</b> .                                           | 58 |
| <b>Figure S90.</b> $^1\text{H}$ -NMR (pyridine- $d_5$ , 500 MHz) spectrum of ( <i>R</i> )-MTPA ester of <b>7</b> .  | 59 |
| <b>Figure S91.</b> COSY spectrum of ( <i>S</i> )-MTPA ester of <b>7</b> .                                           | 59 |

**Table S1.** Twenty-two microorganisms were incubated for screening of yakuchinone A.

| Microorganisms                                                  | Metabolite production <sup>a</sup> |
|-----------------------------------------------------------------|------------------------------------|
| <i>Absidia coerulea</i> KCTC 6936                               | (+)                                |
| <i>Alternaria alternata</i> KCTC 6005                           | (-)                                |
| <i>Aspergillus fumigatus</i> KCTC 6145                          | (-)                                |
| <i>Aspergillus niger</i> KCCM 60332                             | (-)                                |
| <i>Aspergillus oryzae</i> KCCM 60345                            | (-)                                |
| <i>Cunninghamella elegans</i> var. <i>elegans</i> KCTC 6992     | (+)                                |
| <i>Filobasidium neoformans</i> KCTC 7902                        | (-)                                |
| <i>Fusarium merismoides</i> KCTC 6153                           | (-)                                |
| <i>Gliocladium deliquescens</i> KCTC 6173                       | (-)                                |
| <i>Glomerella cingulata</i> KCTC 6075                           | (-)                                |
| <i>Hormoconis resinae</i> KCTC 6966                             | (+)                                |
| <i>Kluyveromyces marxianus</i> KCTC 7155                        | (-)                                |
| <i>Mortierella ramanniana</i> var. <i>angulispora</i> KCTC 6137 | (-)                                |
| <i>Monascus rubber</i> KCTC 6122                                | (-)                                |
| <i>Mucor hiemalis</i> KCTC 26779                                | (+++)                              |
| <i>Mucor plumbeus</i> KCCM 60265                                | (++)                               |
| <i>Penicillium chrysogenum</i> KCTC 6933                        | (-)                                |
| <i>Rhizopus oryzae</i> KCCM 60556                               | (+)                                |
| <i>Saccharomyces ludwigii</i> KCTC 7126                         | (-)                                |
| <i>Torulaspora delbrueckii</i> KCTC 7116                        | (-)                                |
| <i>Trichoderma koningii</i> KCTC 6042                           | (-)                                |
| <i>Tremella mesenterica</i> KCTC 7131                           | (-)                                |

<sup>a</sup> Metabolite production denoted by (+) indicated that metabolites were produced as shown by TLC analysis.

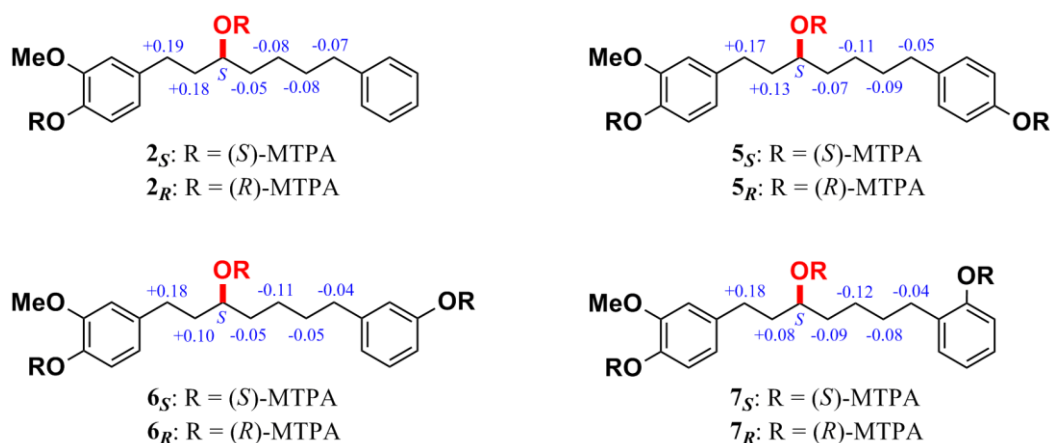

**Figure S1.**  $\Delta\delta_H$  ( $=\delta_S-\delta_R$ ) values for the Mosher ester derivatives of 2, 5, 6, and 7.

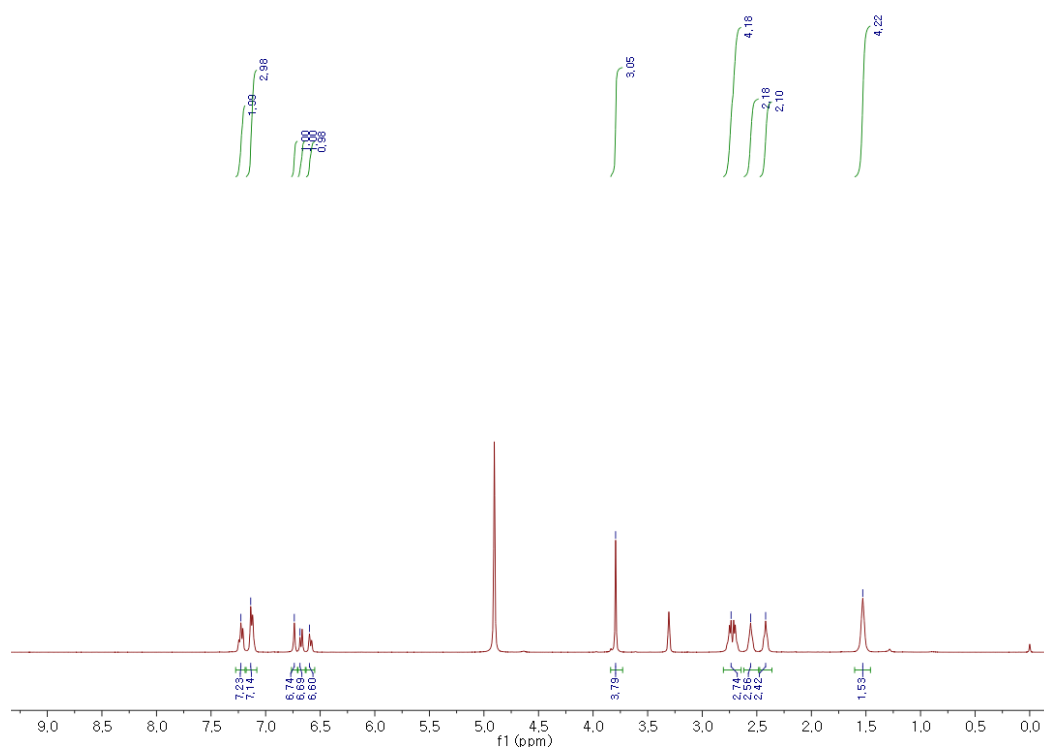

**Figure S2.**  $^1\text{H-NMR}$  ( $\text{CD}_3\text{OD}$ , 400 MHz) spectrum of yakuchinone A (1).

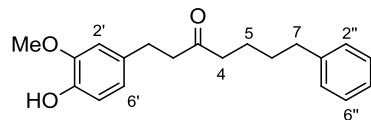

**Yakuchinone A (1)**

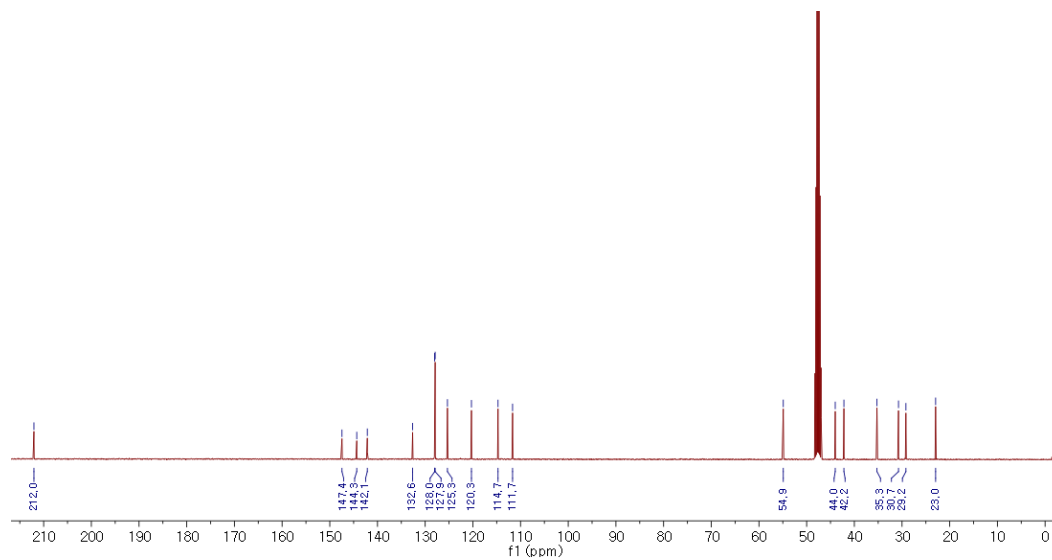

**Figure S3.**  $^{13}\text{C-NMR}$  ( $\text{CD}_3\text{OD}$ , 100 MHz) spectrum of yakuchinone A (1).

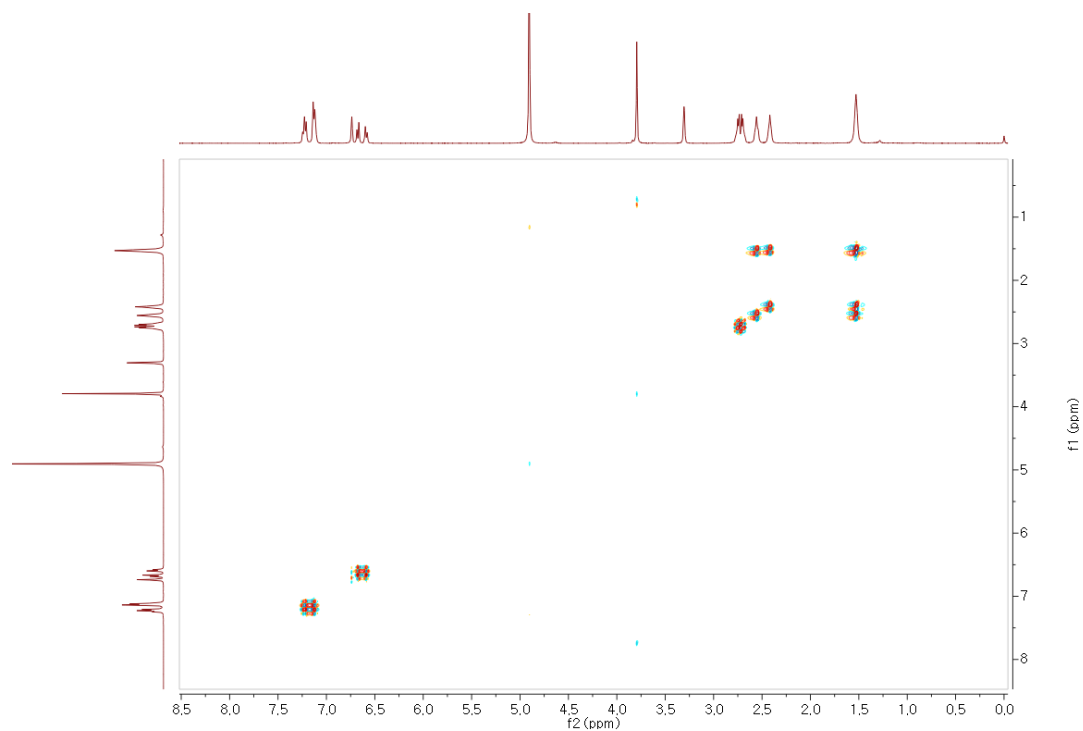

**Figure S4.** COSY spectrum of yakuchinone A (**1**).

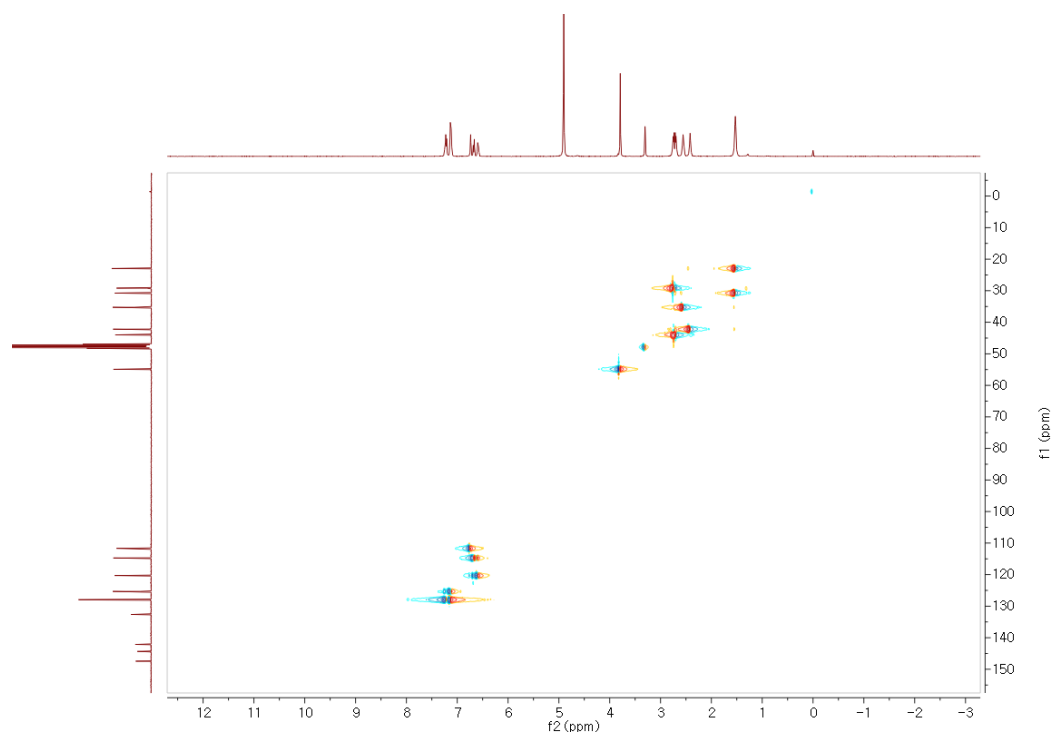

**Figure S5.** HSQC spectrum of yakuchinone A (**1**).

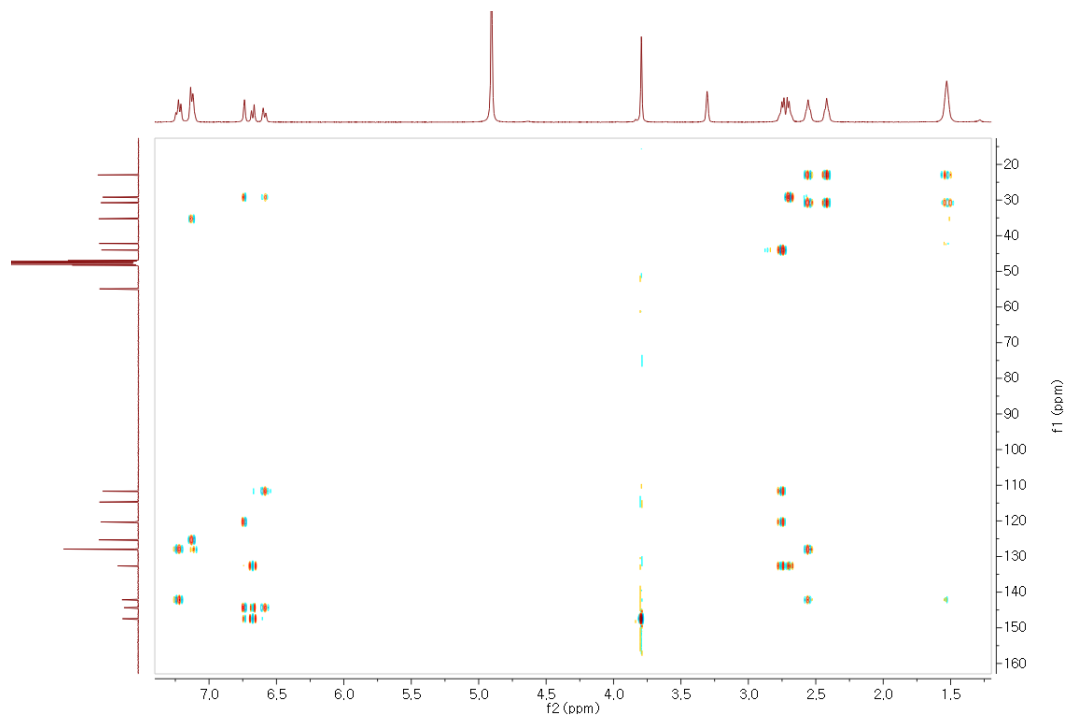

**Figure S6.** HMBC spectrum of yakuchinone A (**1**).

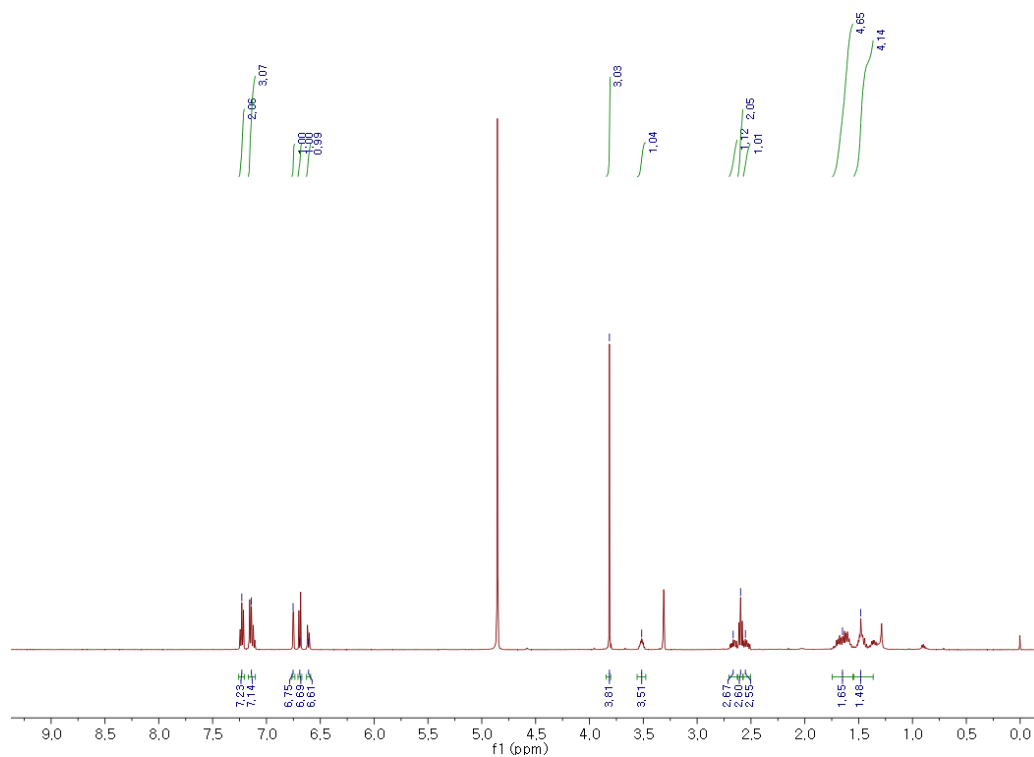

**Figure S7.**  $^1\text{H}$ -NMR ( $\text{CD}_3\text{OD}$ , 500 MHz) spectrum of **2**.



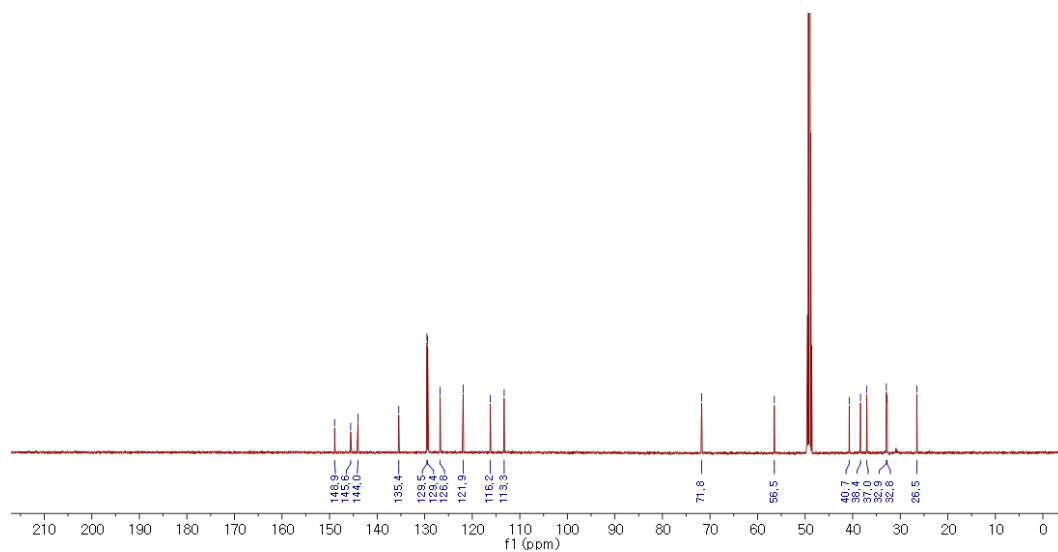

**Figure S8.**  $^{13}\text{C}$ -NMR ( $\text{CD}_3\text{OD}$ , 125 MHz) spectrum of **2**.

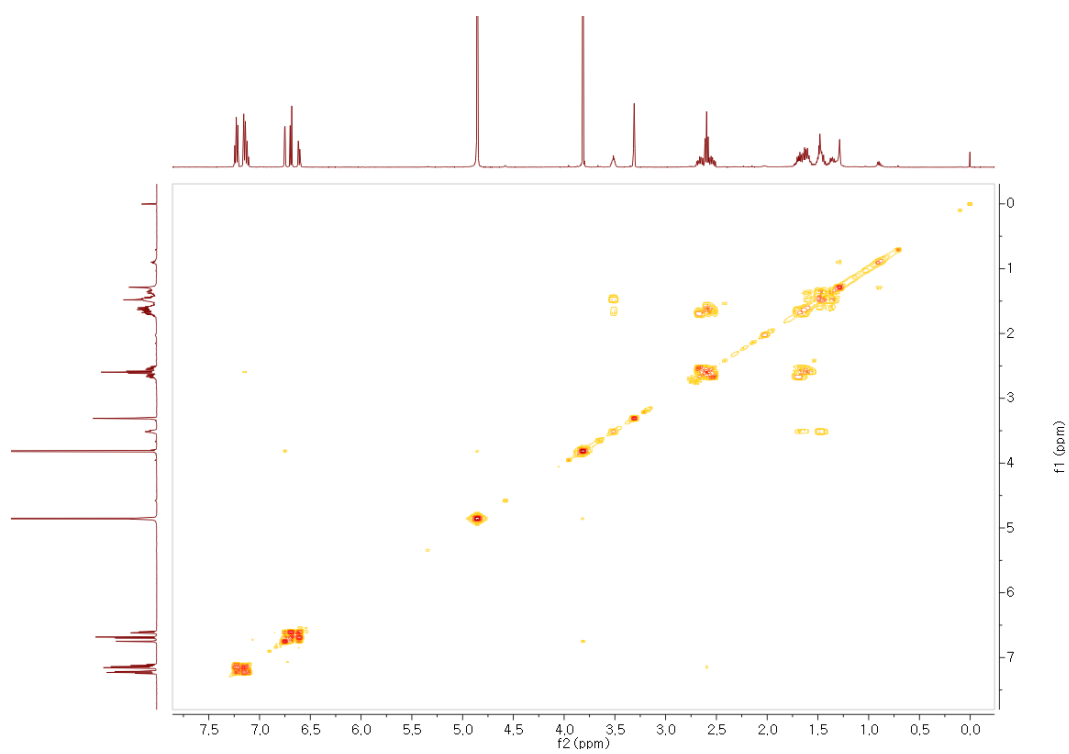

**Figure S9.** COSY spectrum of **2**.

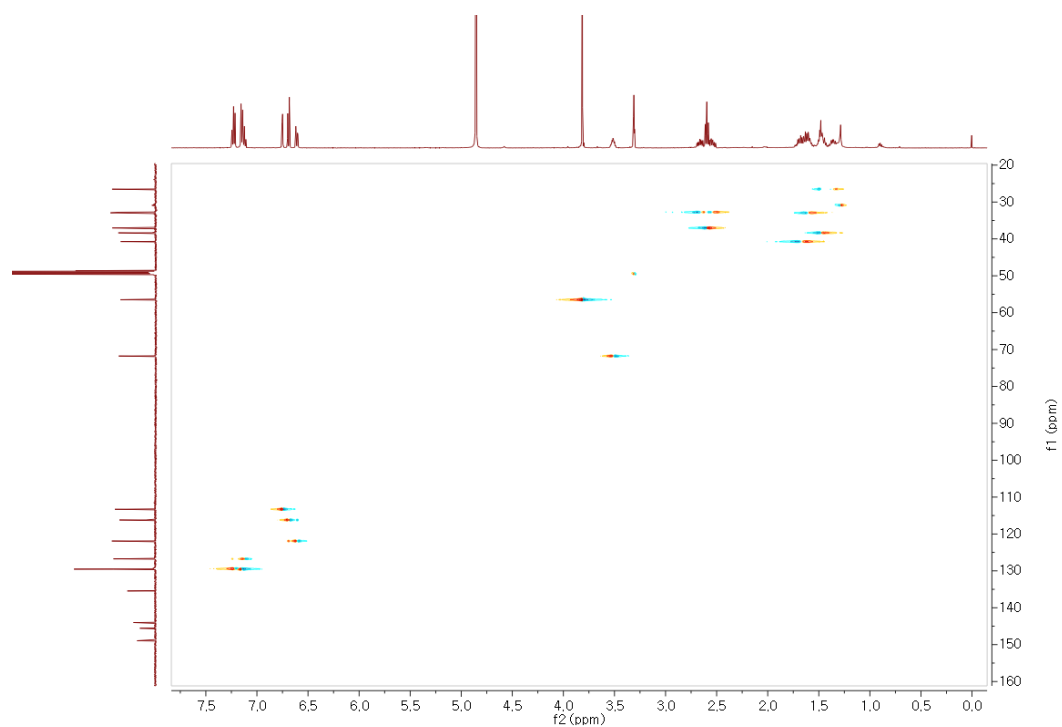

Figure S10. HSQC spectrum of 2.

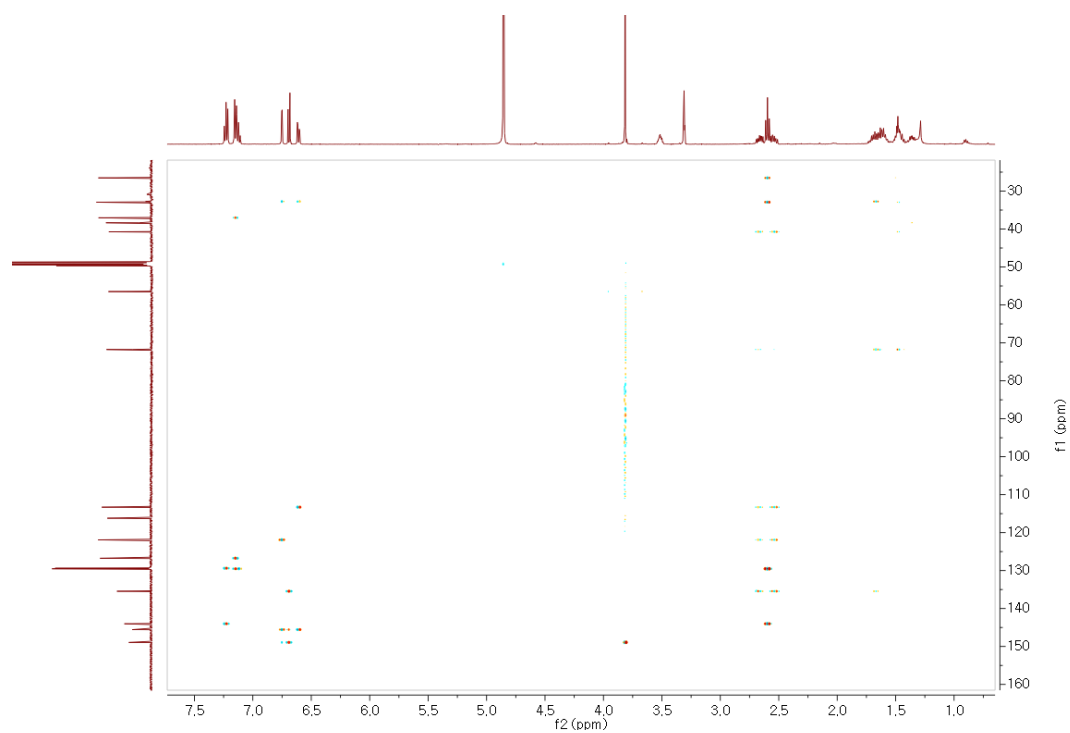

Figure S11. HMBC spectrum of 2.

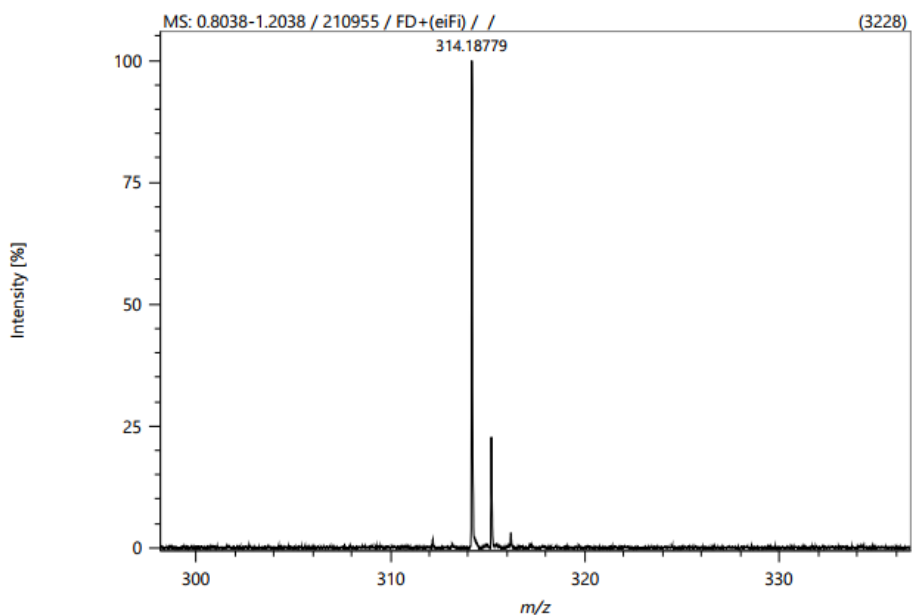

#### Elemental Composition

##### Parameters

Tolerance: 30.00 mDa  
 Electron: Odd/Even  
 Charge: +1  
 DBE: -90.0 - 90.0

##### Elements Set 1:

| Symbol | C  | H  | O |
|--------|----|----|---|
| Min    | 1  | 5  | 1 |
| Max    | 20 | 26 | 3 |

#### Results

| Mass      | Intensity | Formula                                        | Calculated Mass | Mass Difference [mDa] | Mass Difference [ppm] | DBE |
|-----------|-----------|------------------------------------------------|-----------------|-----------------------|-----------------------|-----|
| 314.18779 | 3228.10   | C <sub>20</sub> H <sub>26</sub> O <sub>3</sub> | 314.18765       | 0.15                  | 0.46                  | 8.0 |

**Figure S12.** HRFDMS spectrum of **2**.

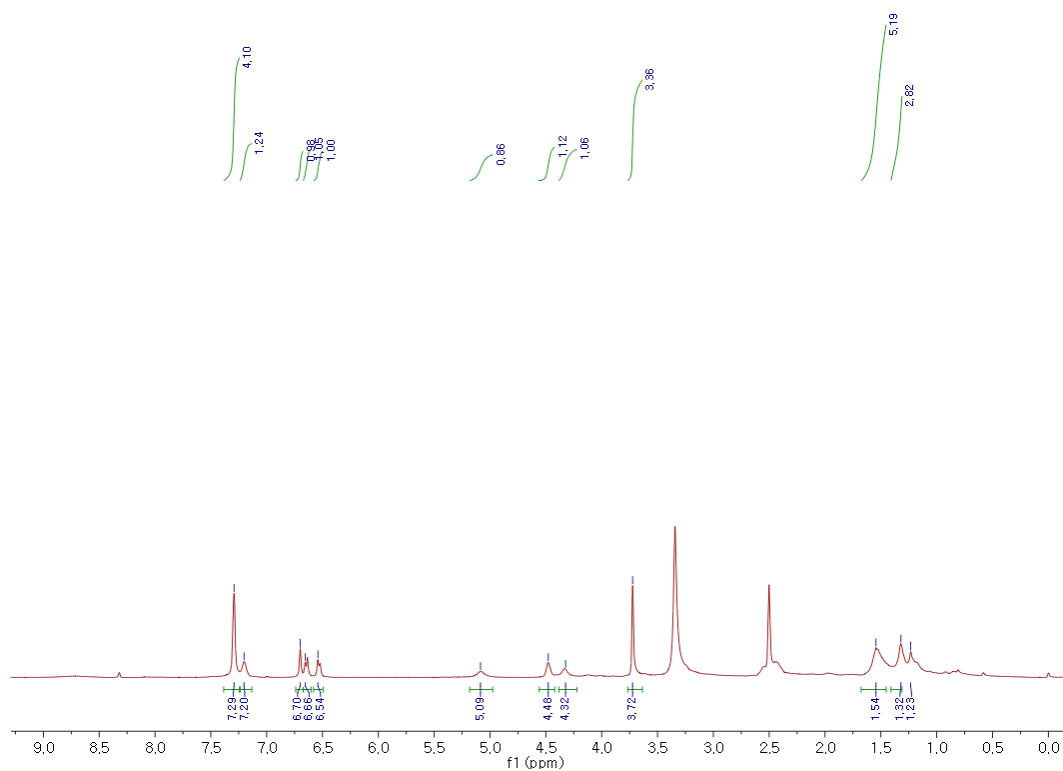

**Figure S13.** <sup>1</sup>H-NMR (DMSO-*d*<sub>6</sub>, 400 MHz) spectrum of **3**.

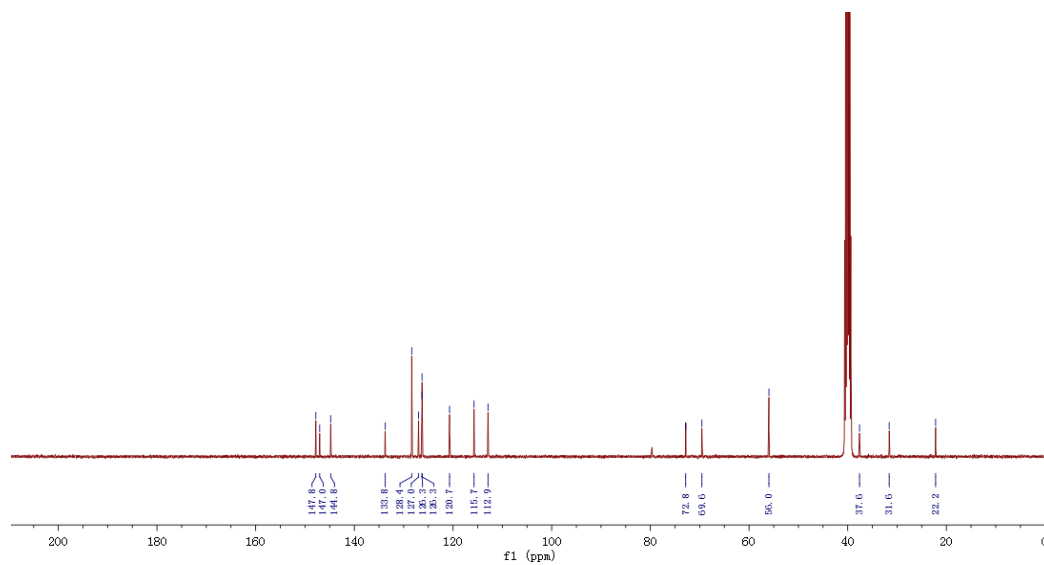

**Figure S14.** <sup>13</sup>C-NMR (DMSO-*d*<sub>6</sub>, 100 MHz) spectrum of **3**.

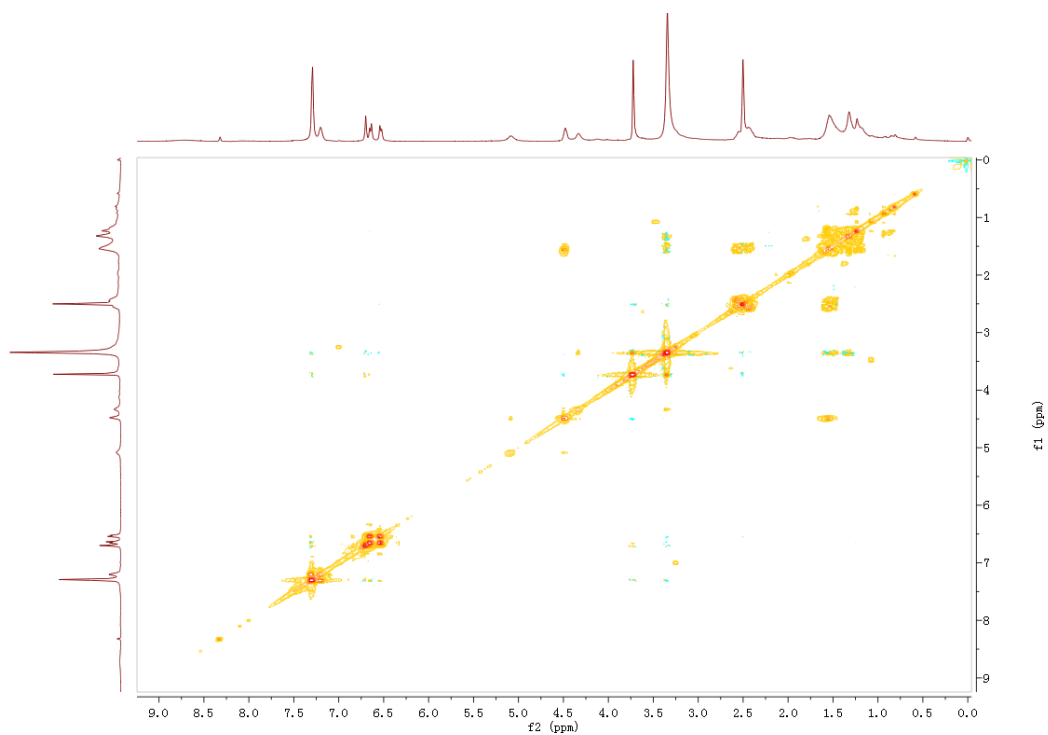

Figure S15. COSY spectrum of **3**.

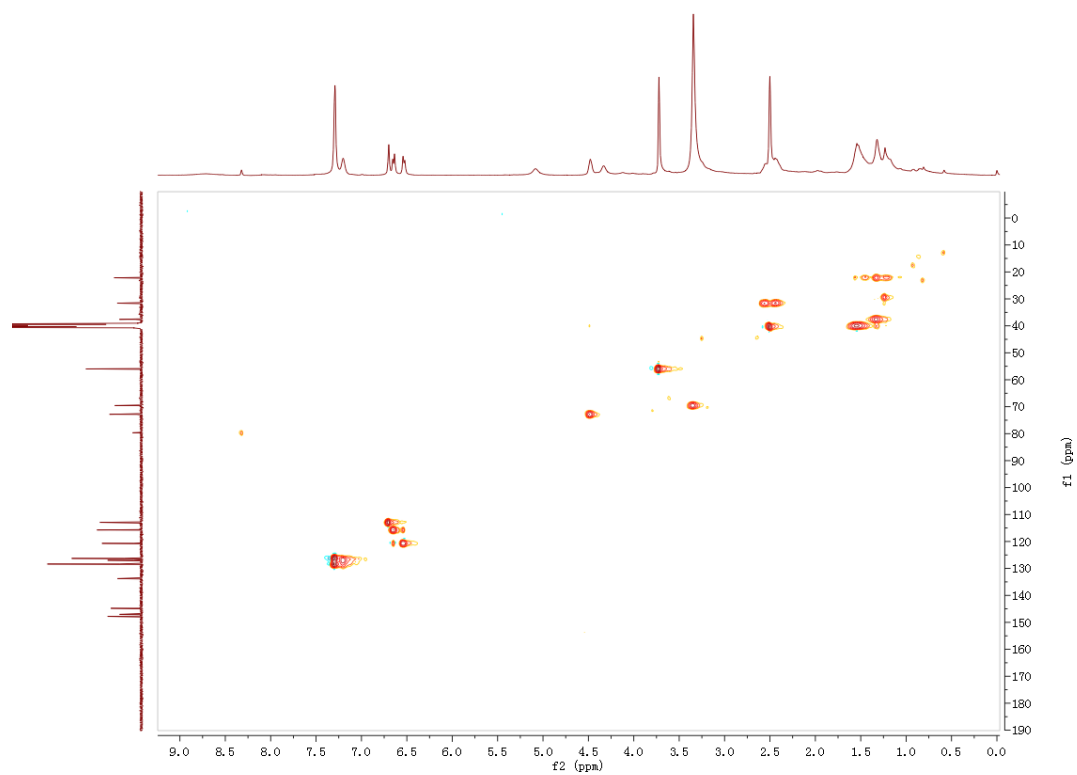

Figure S16. HSQC spectrum of **3**.

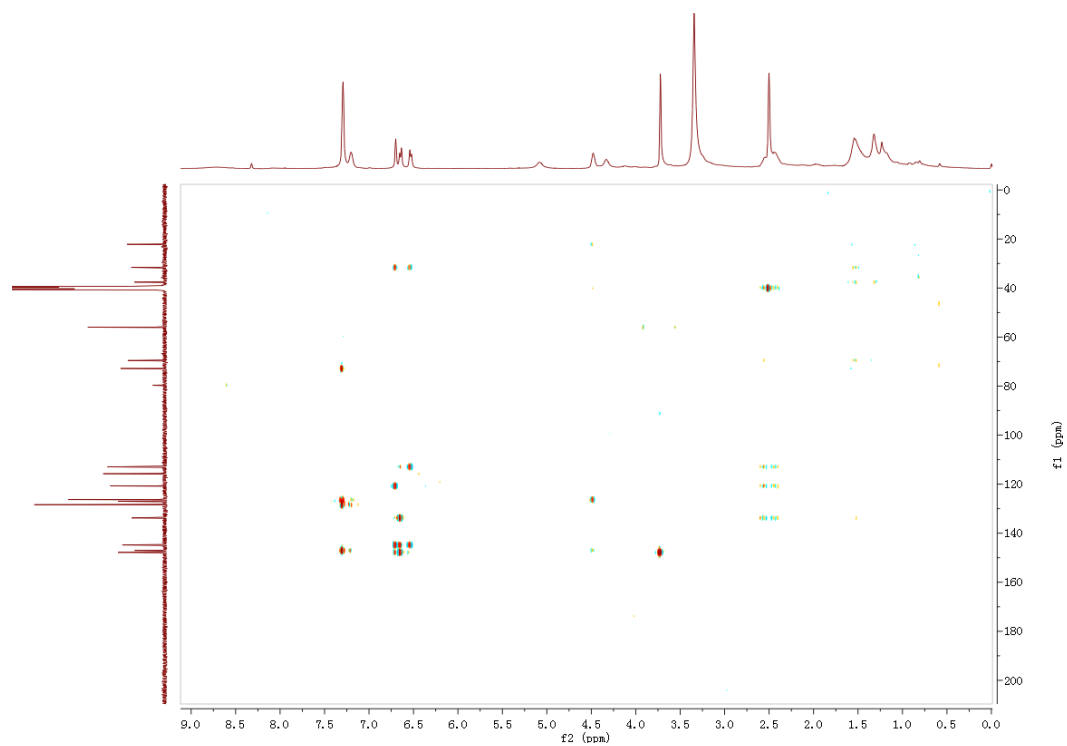

**Figure S17.** HMBC spectrum of **3**.

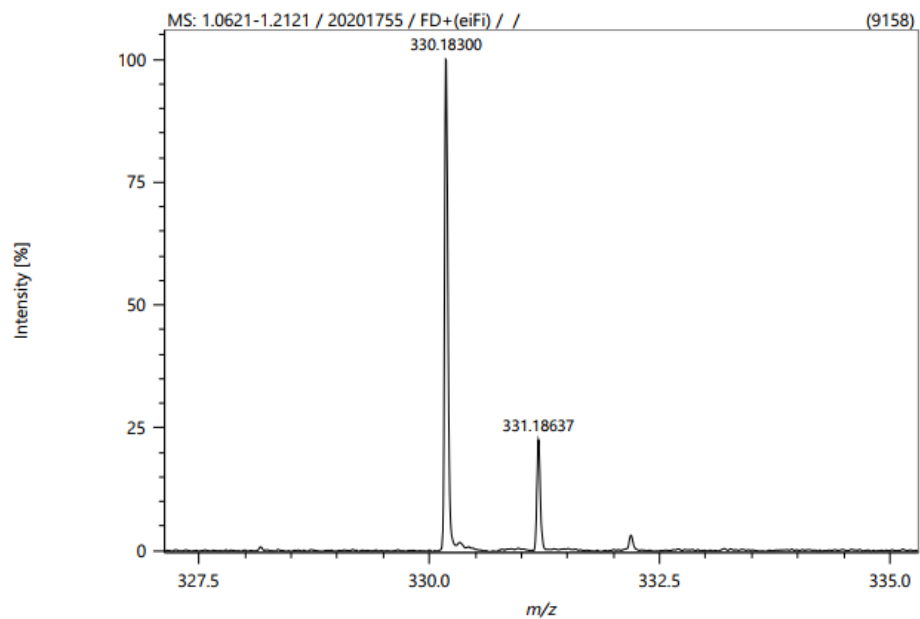

#### Elemental Composition

##### Parameters

Tolerance: 30.00 mDa  
 Electron: Odd/Even  
 Charge: +1  
 DBE: -90.0 - 90.0

##### Elements Set 1:

| Symbol | C  | H  | O |
|--------|----|----|---|
| Min    | 5  | 5  | 1 |
| Max    | 20 | 26 | 4 |

#### Results

| Mass      | Intensity | Formula                                        | Calculated Mass | Mass Difference [mDa] | Mass Difference [ppm] | DBE |
|-----------|-----------|------------------------------------------------|-----------------|-----------------------|-----------------------|-----|
| 330.18300 | 9158.13   | C <sub>20</sub> H <sub>26</sub> O <sub>4</sub> | 330.18256       | 0.44                  | 1.35                  | 8.0 |

Figure S18. HRFDMS spectrum of **3**.

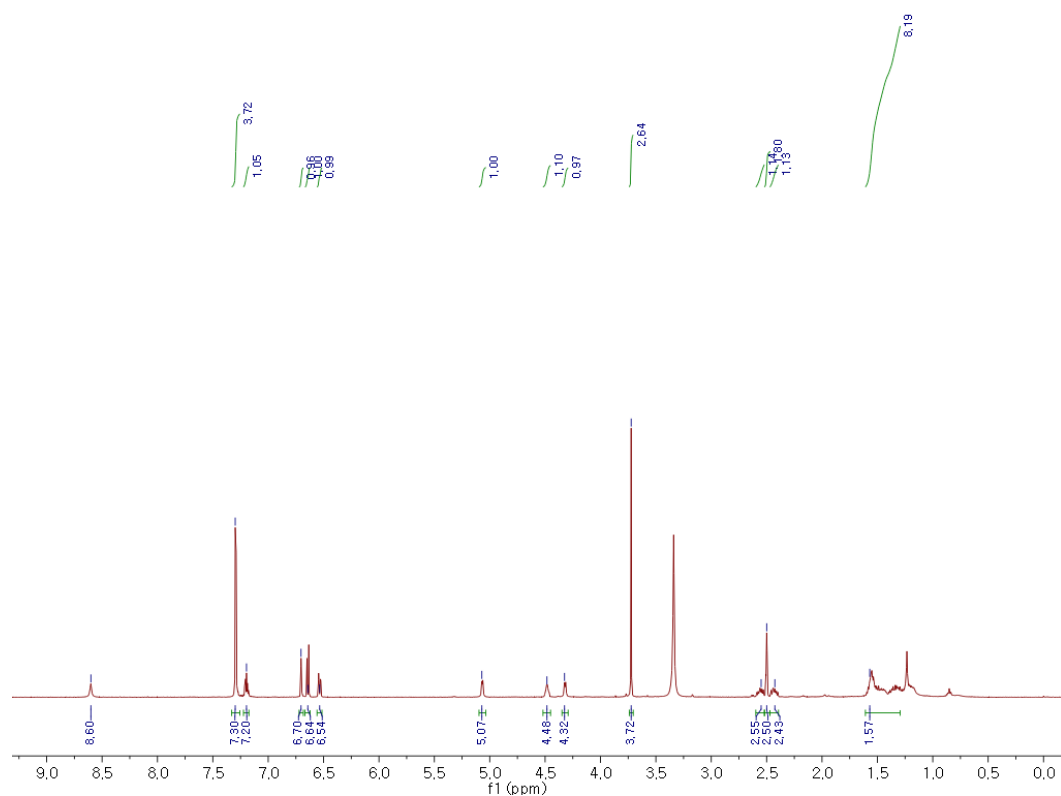

**Figure S19.** <sup>1</sup>H-NMR (DMSO-*d*<sub>6</sub>, 500 MHz) spectrum of 3a.

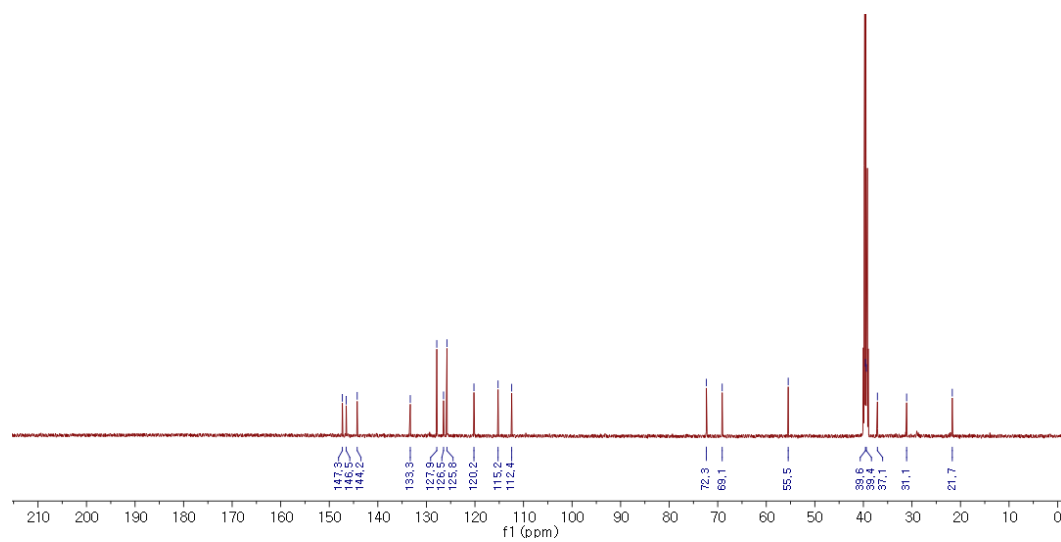

**Figure S20.** <sup>13</sup>C-NMR (DMSO-*d*<sub>6</sub>, 125 MHz) spectrum of 3a.



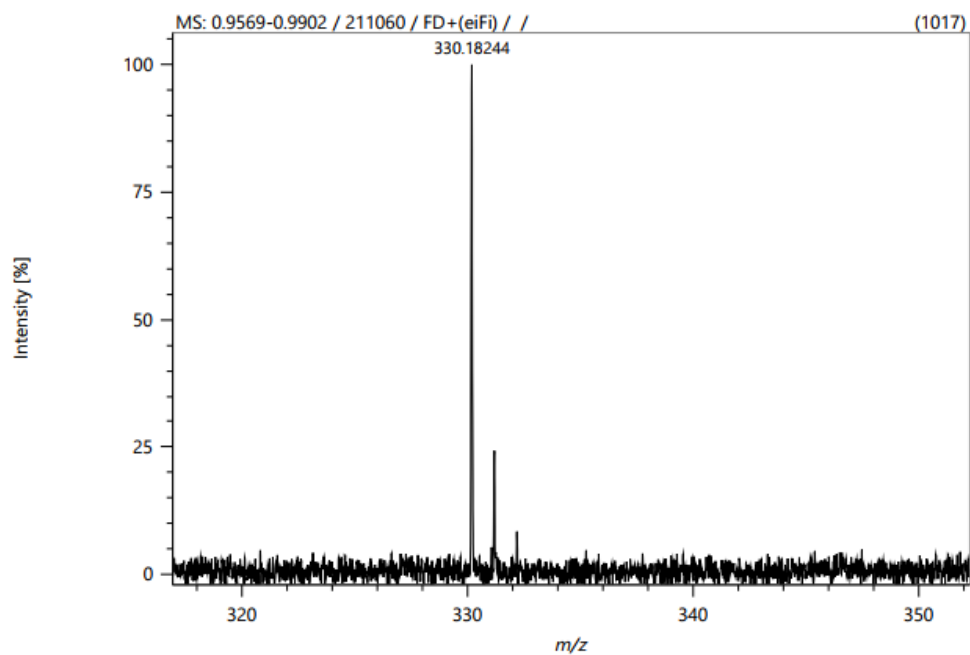

#### Elemental Composition

| Parameters |              | Elements Set 1: |    |    |   |
|------------|--------------|-----------------|----|----|---|
| Tolerance: | 30.00 mDa    | Symbol          | C  | H  | O |
| Electron:  | Odd/Even     | Min             | 1  | 5  | 1 |
| Charge:    | +1           | Max             | 20 | 26 | 4 |
| DBE:       | -90.0 - 90.0 |                 |    |    |   |

#### Results

| Mass      | Intensity | Formula                                        | Calculated Mass | Mass Difference [mDa] | Mass Difference [ppm] | DBE |
|-----------|-----------|------------------------------------------------|-----------------|-----------------------|-----------------------|-----|
| 330.18244 | 1016.67   | C <sub>20</sub> H <sub>26</sub> O <sub>4</sub> | 330.18256       | -0.13                 | -0.38                 | 8.0 |

Figure S21. HRFDMS spectrum of **3a**.

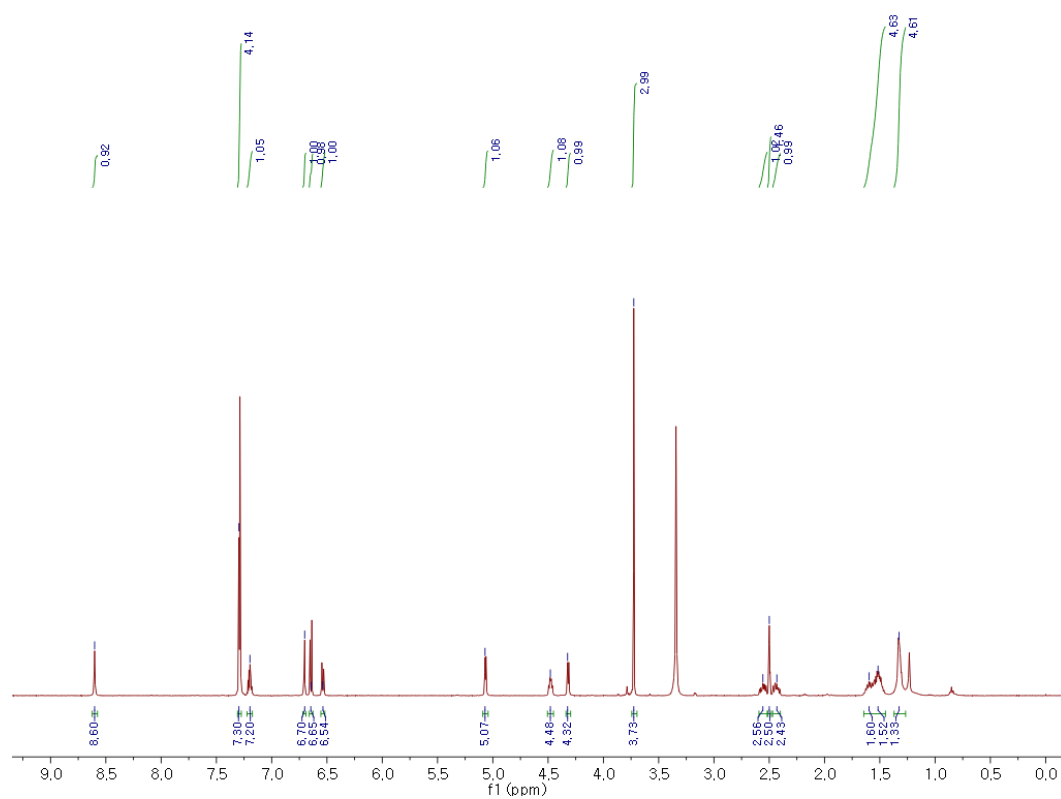

**Figure S22.** <sup>1</sup>H-NMR (DMSO-*d*<sub>6</sub>, 500 MHz) spectrum of **3b**.

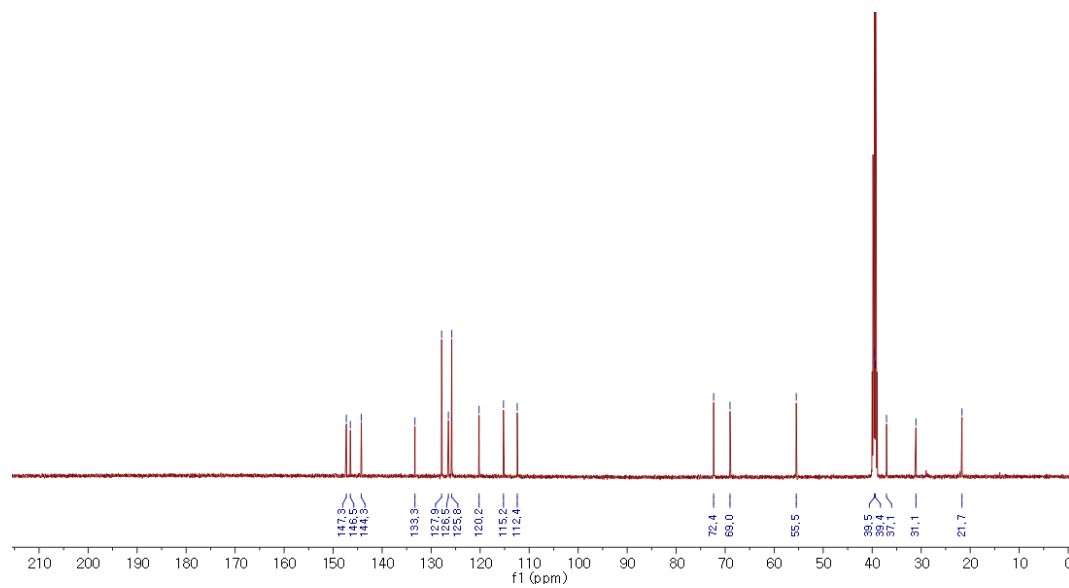

**Figure S23.** <sup>13</sup>C-NMR (DMSO-*d*<sub>6</sub>, 125 MHz) spectrum of **3b**.

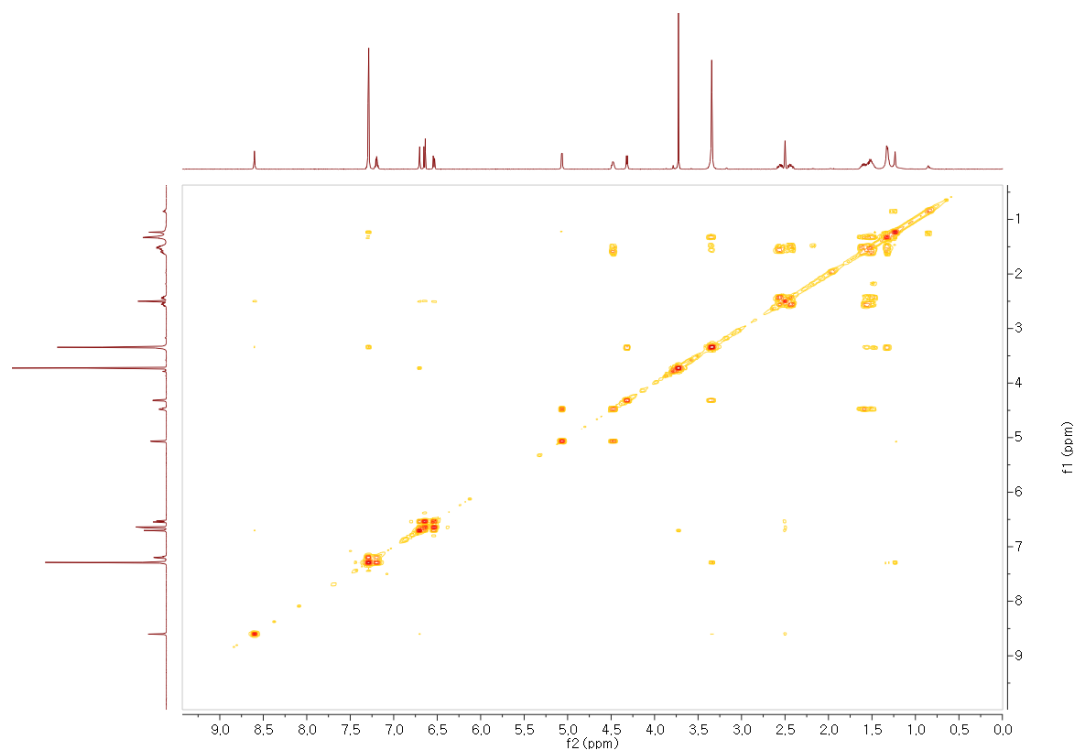

Figure S24. COSY spectrum of **3b**.

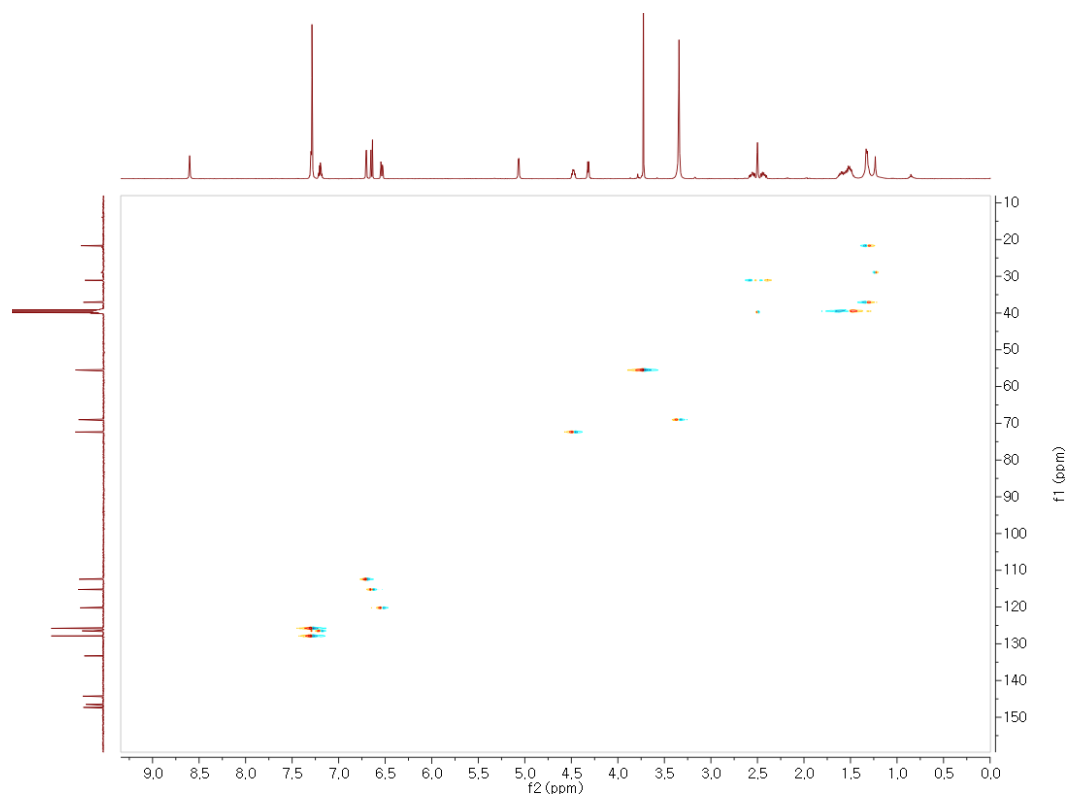

Figure S25. HSQC spectrum of **3b**.

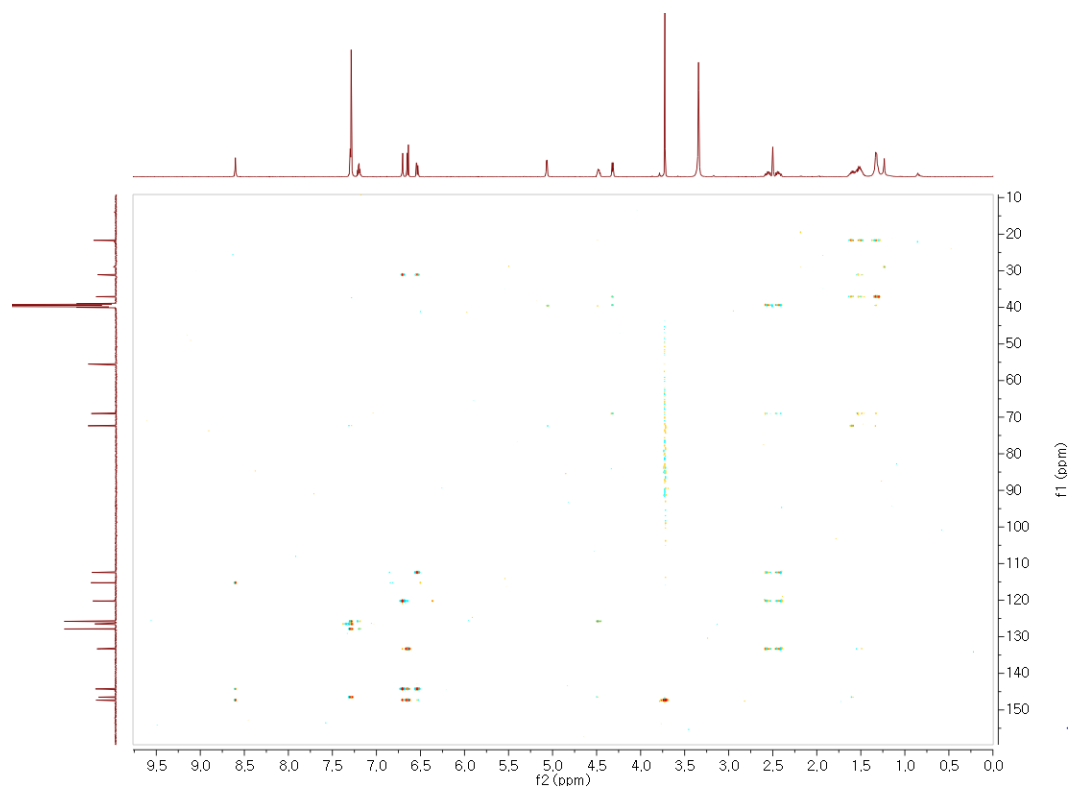

**Figure S26.** HMBC spectrum of **3b**.

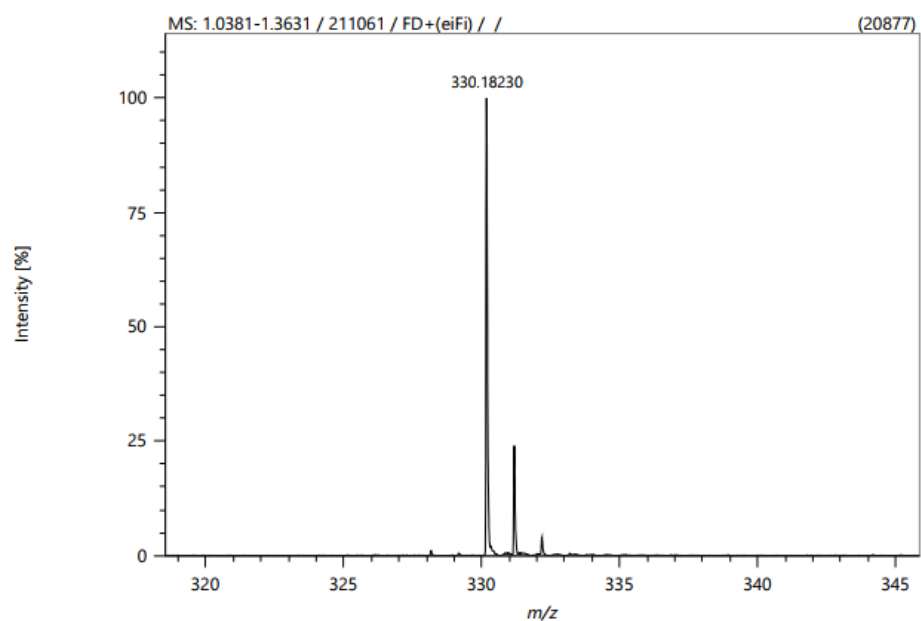

#### Elemental Composition

##### Parameters

Tolerance: 30.00 mDa  
 Electron: Odd/Even  
 Charge: +1  
 DBE: -90.0 - 90.0

##### Elements Set 1:

| Symbol | C  | H  | O |
|--------|----|----|---|
| Min    | 1  | 5  | 1 |
| Max    | 20 | 26 | 4 |

#### Results

| Mass      | Intensity | Formula                                        | Calculated Mass | Mass Difference [mDa] | Mass Difference [ppm] | DBE |
|-----------|-----------|------------------------------------------------|-----------------|-----------------------|-----------------------|-----|
| 330.18230 | 20876.99  | C <sub>20</sub> H <sub>26</sub> O <sub>4</sub> | 330.18256       | -0.26                 | -0.80                 | 8.0 |

Figure S27. HRFDMS spectrum of **3b**.

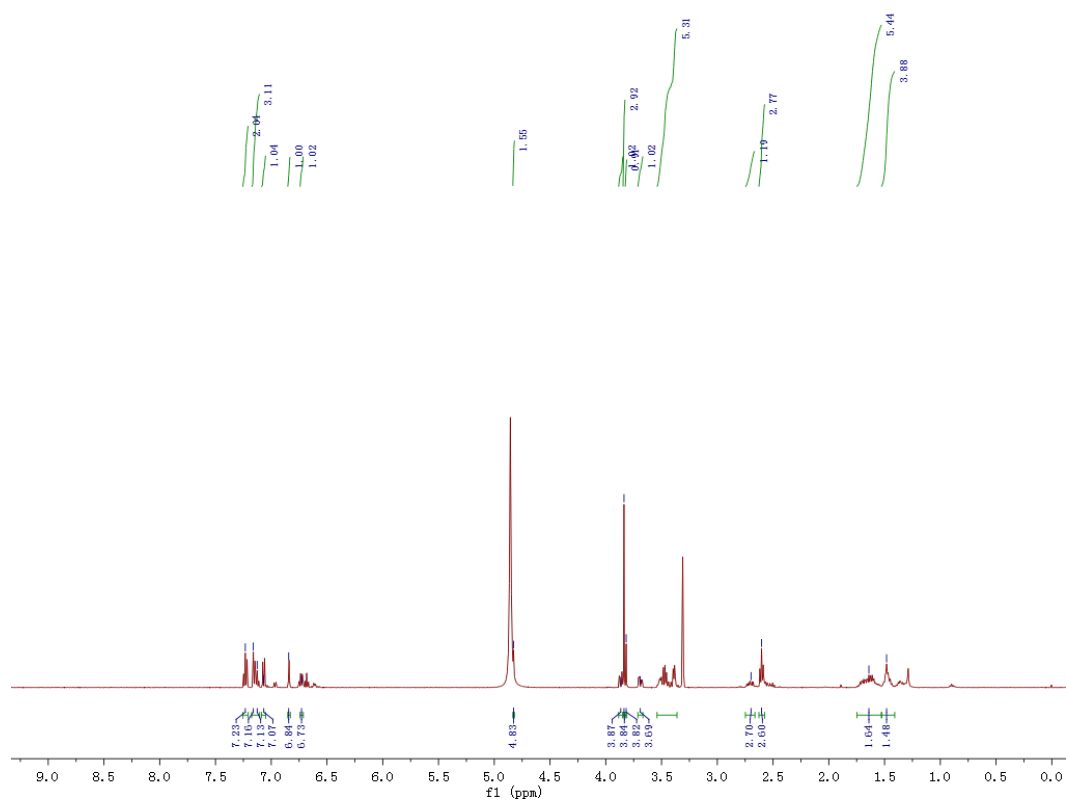

**Figure S28.** <sup>1</sup>H-NMR (CD<sub>3</sub>OD, 500 MHz) spectrum of 4.

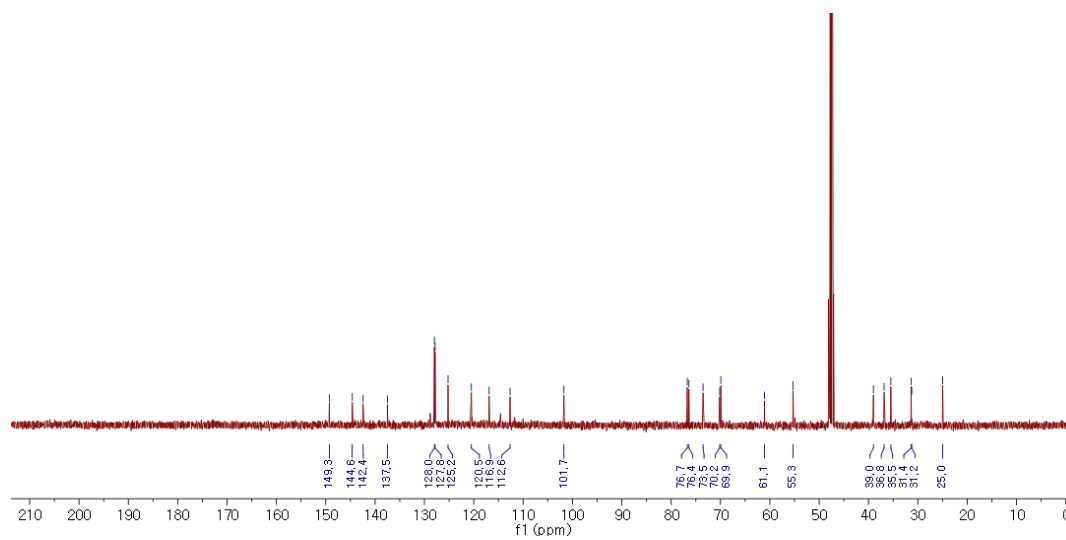

**Figure S29.** <sup>13</sup>C-NMR (CD<sub>3</sub>OD, 125 MHz) spectrum of 4.

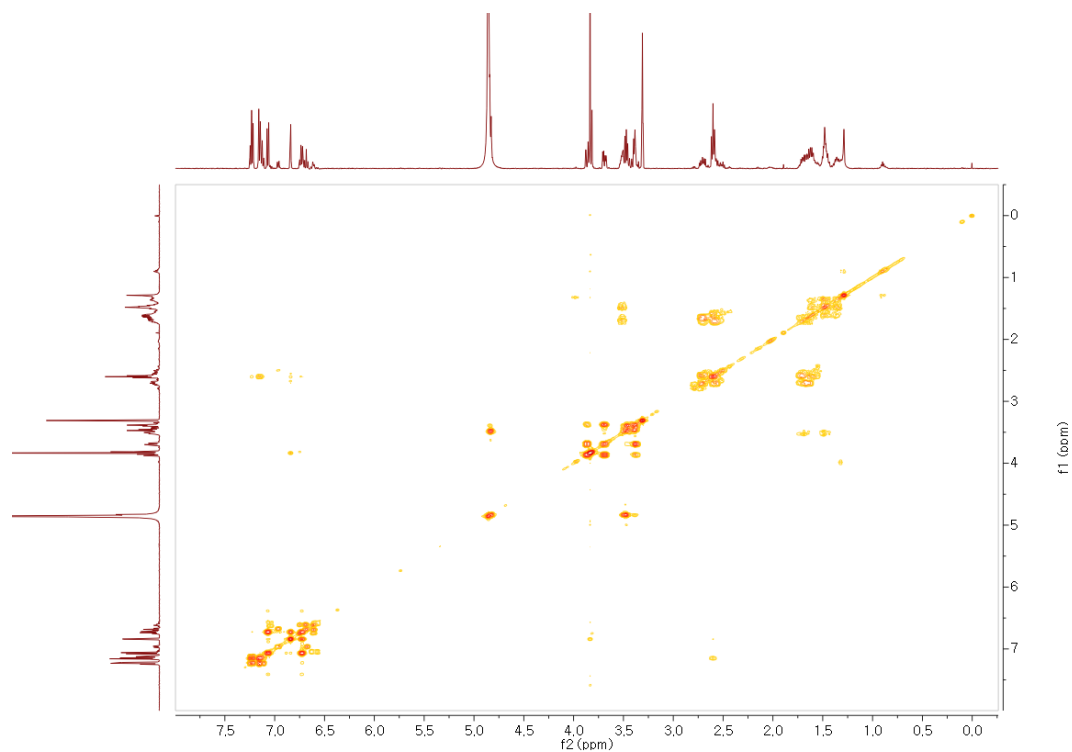

Figure S30. COSY spectrum of 4.

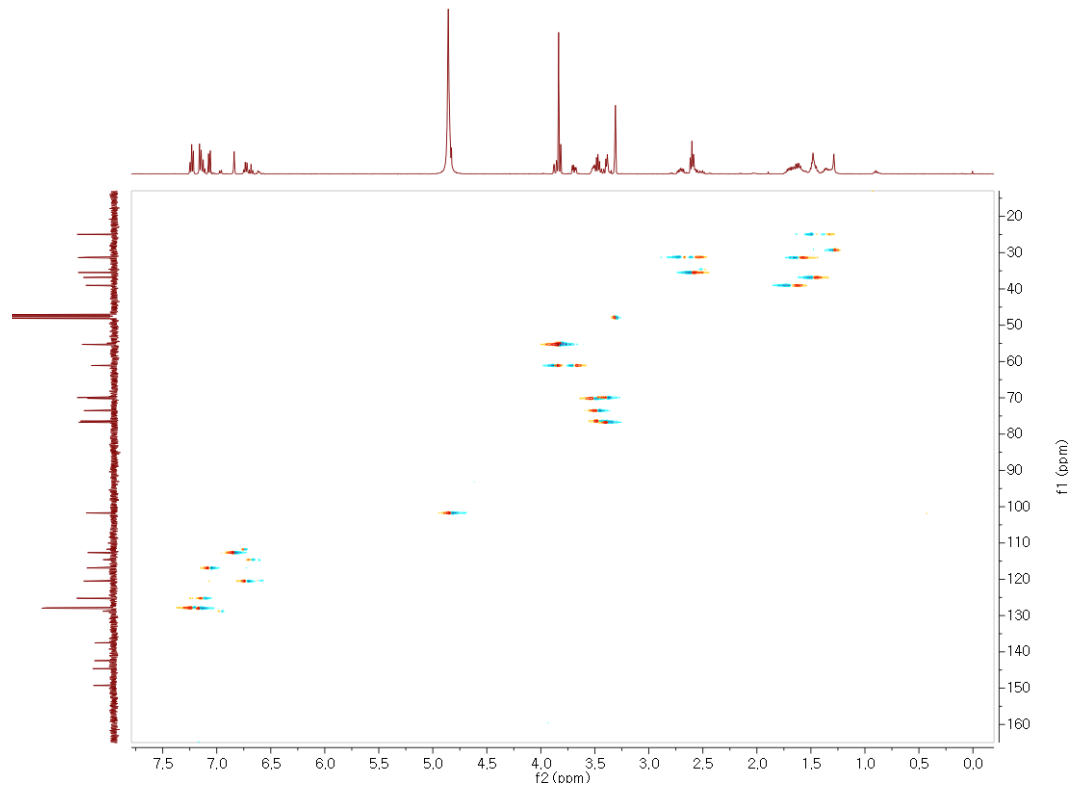

Figure S31. HSQC spectrum of 4.

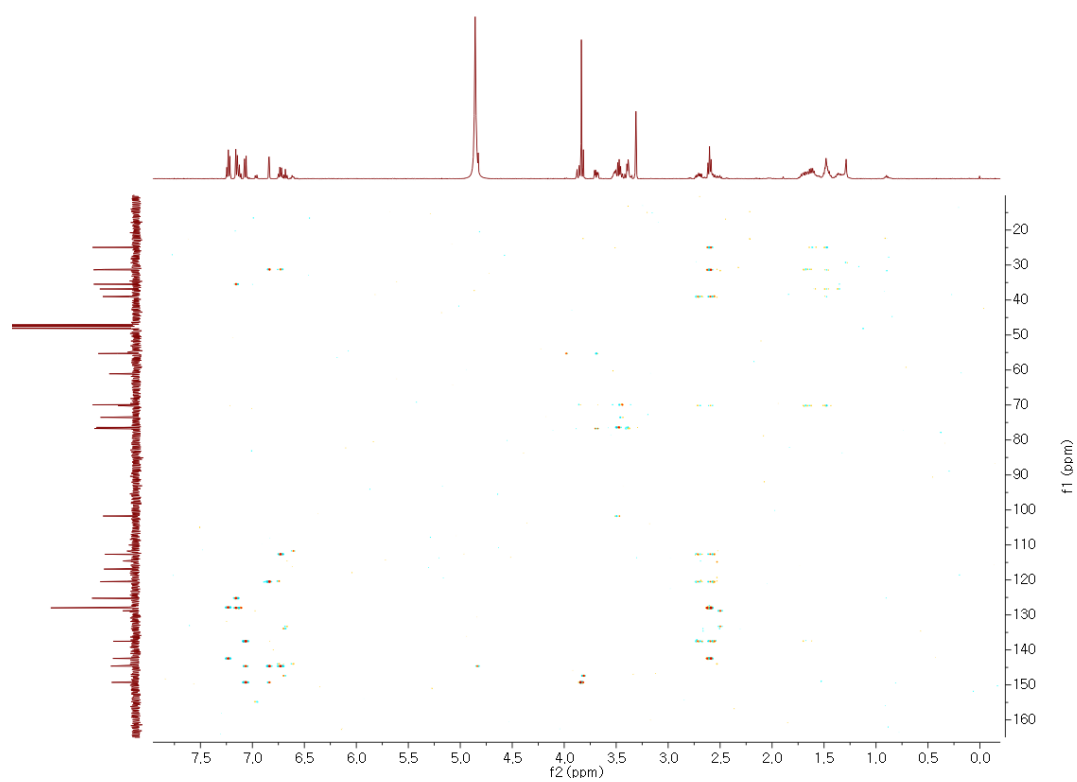

Figure S32. HMBC spectrum of **4**.



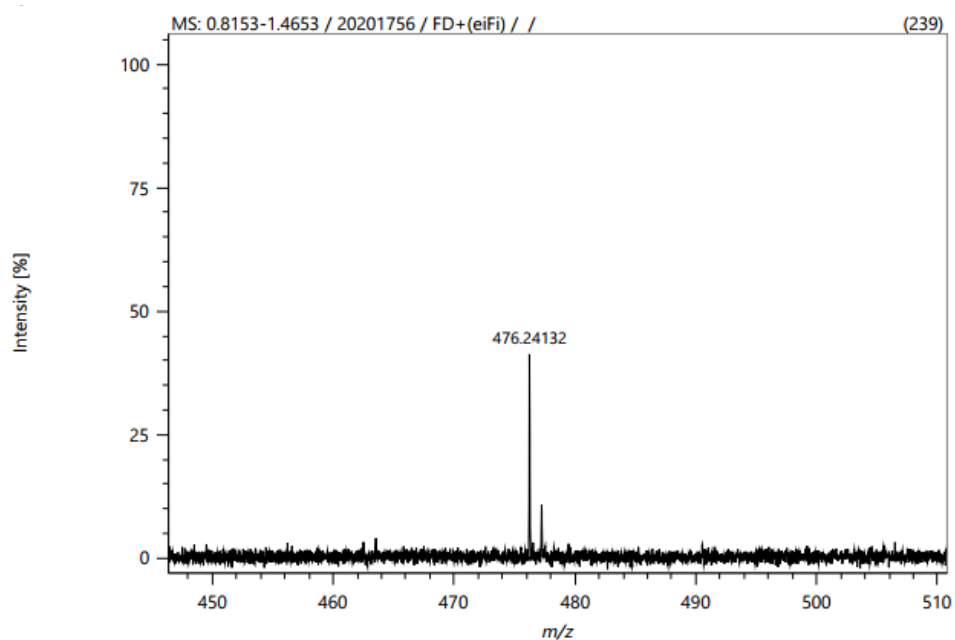

#### Elemental Composition

##### Parameters

Tolerance: 30.00 mDa  
 Electron: Odd/Even  
 Charge: +1  
 DBE: -90.0 - 90.0

##### Elements Set 1:

| Symbol | C  | H  | O |
|--------|----|----|---|
| Min    | 5  | 5  | 1 |
| Max    | 26 | 36 | 8 |

#### Results

| Mass      | Intensity | Formula                                        | Calculated Mass | Mass Difference [mDa] | Mass Difference [ppm] | DBE |
|-----------|-----------|------------------------------------------------|-----------------|-----------------------|-----------------------|-----|
| 476.24132 | 238.71    | C <sub>26</sub> H <sub>36</sub> O <sub>8</sub> | 476.24047       | 0.85                  | 1.78                  | 9.0 |

Figure S33. HRFDMS spectrum of **4**.

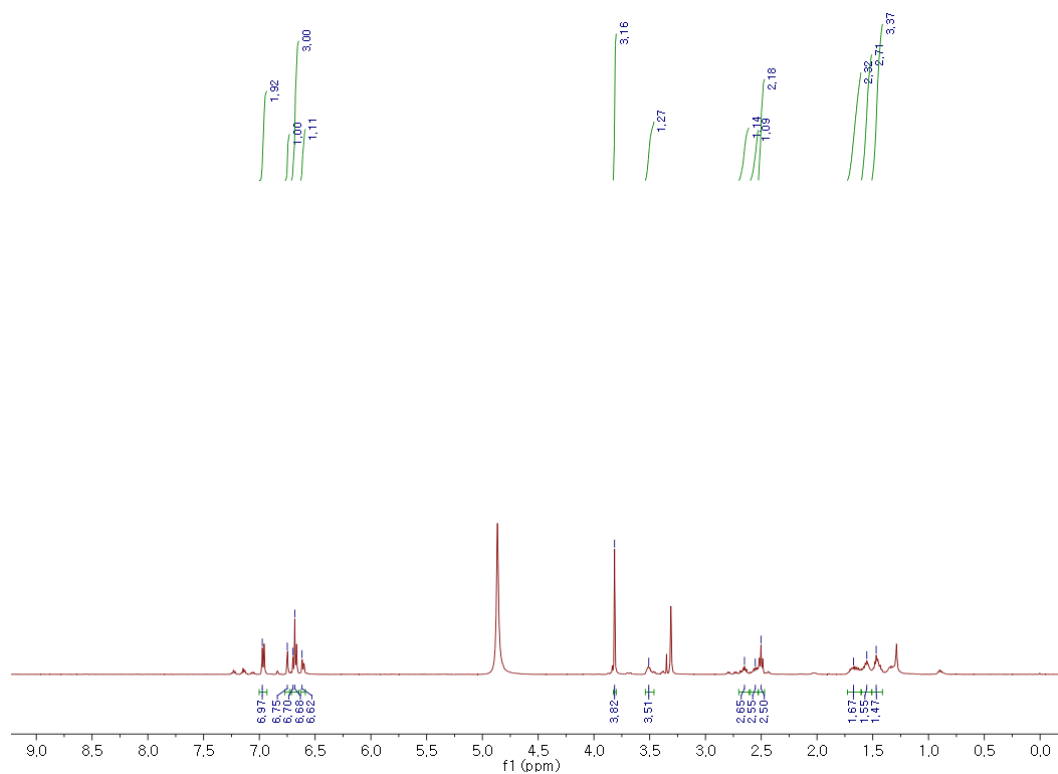

**Figure S34.** <sup>1</sup>H-NMR (CD<sub>3</sub>OD, 500 MHz) spectrum of **5**.

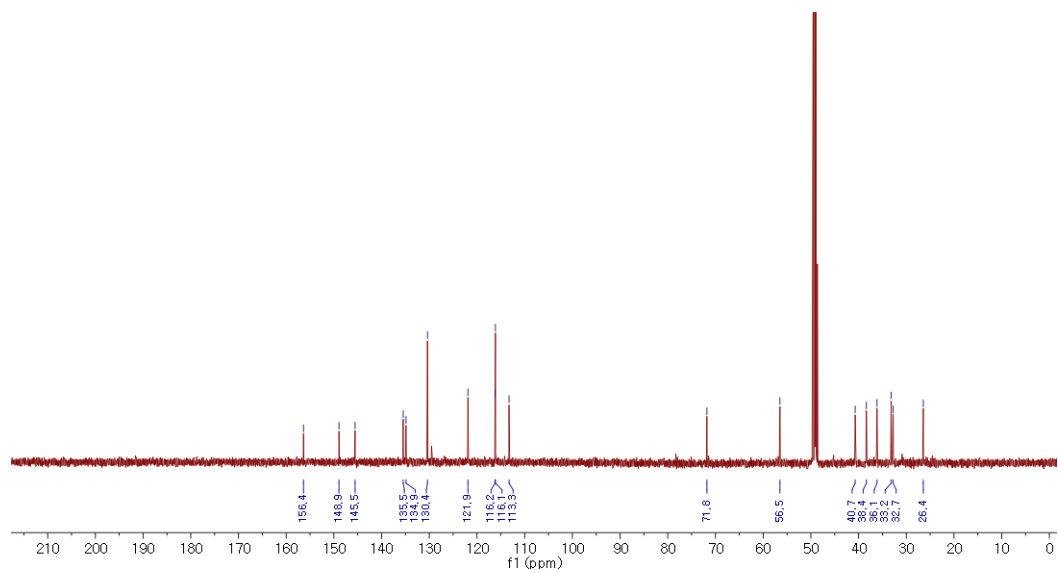

**Figure S35.** <sup>13</sup>C-NMR (CD<sub>3</sub>OD, 125 MHz) spectrum of **5**.

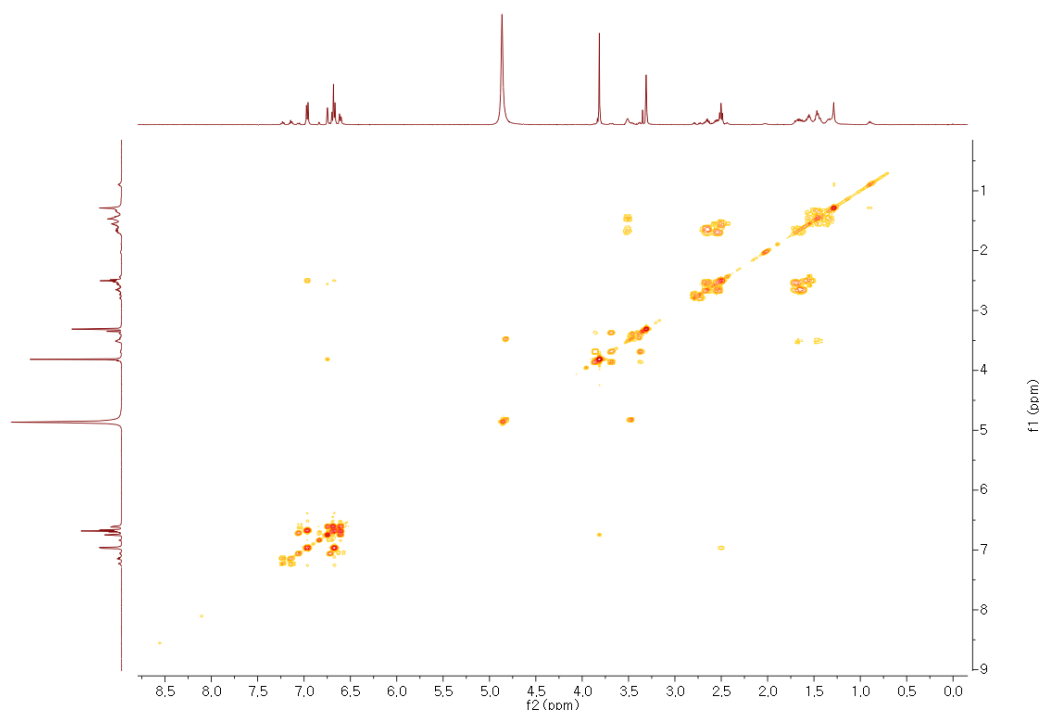

Figure S36. COSY spectrum of 5.

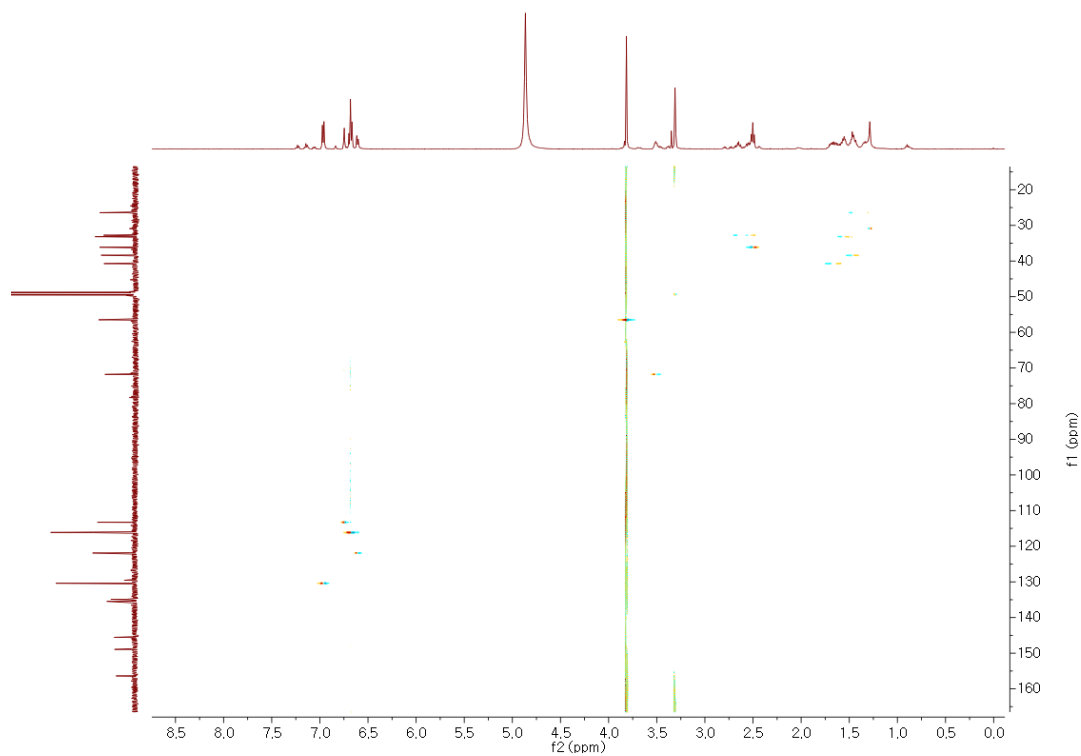

Figure S37. HSQC spectrum of 5.

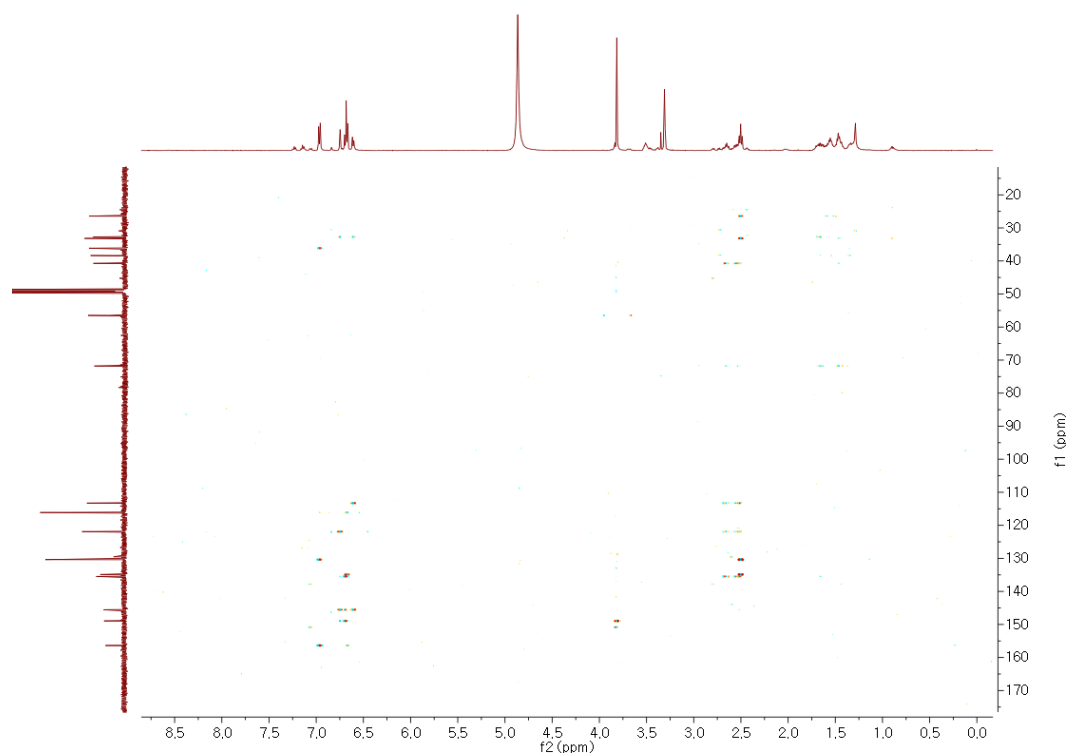

**Figure S38.** HMBC spectrum of **5**.

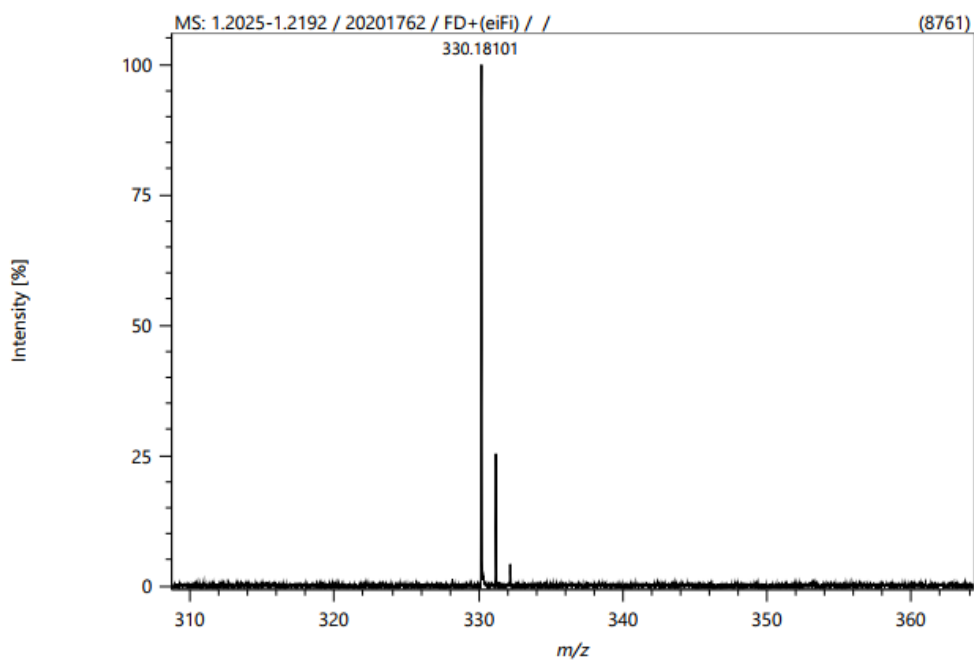

#### Elemental Composition

| Parameters |              | Elements Set 1: |    |    |   |
|------------|--------------|-----------------|----|----|---|
| Tolerance: | 30.00 mDa    | Symbol          | C  | H  | O |
| Electron:  | Odd/Even     | Min             | 5  | 5  | 1 |
| Charge:    | +1           | Max             | 20 | 26 | 4 |
| DBE:       | -90.0 - 90.0 |                 |    |    |   |

#### Results

| Mass      | Intensity | Formula                                        | Calculated Mass | Mass Difference [mDa] | Mass Difference [ppm] | DBE |
|-----------|-----------|------------------------------------------------|-----------------|-----------------------|-----------------------|-----|
| 330.18101 | 8760.60   | C <sub>20</sub> H <sub>26</sub> O <sub>4</sub> | 330.18256       | -1.55                 | -4.69                 | 8.0 |

Figure S39. HRFDMS spectrum of **5**.

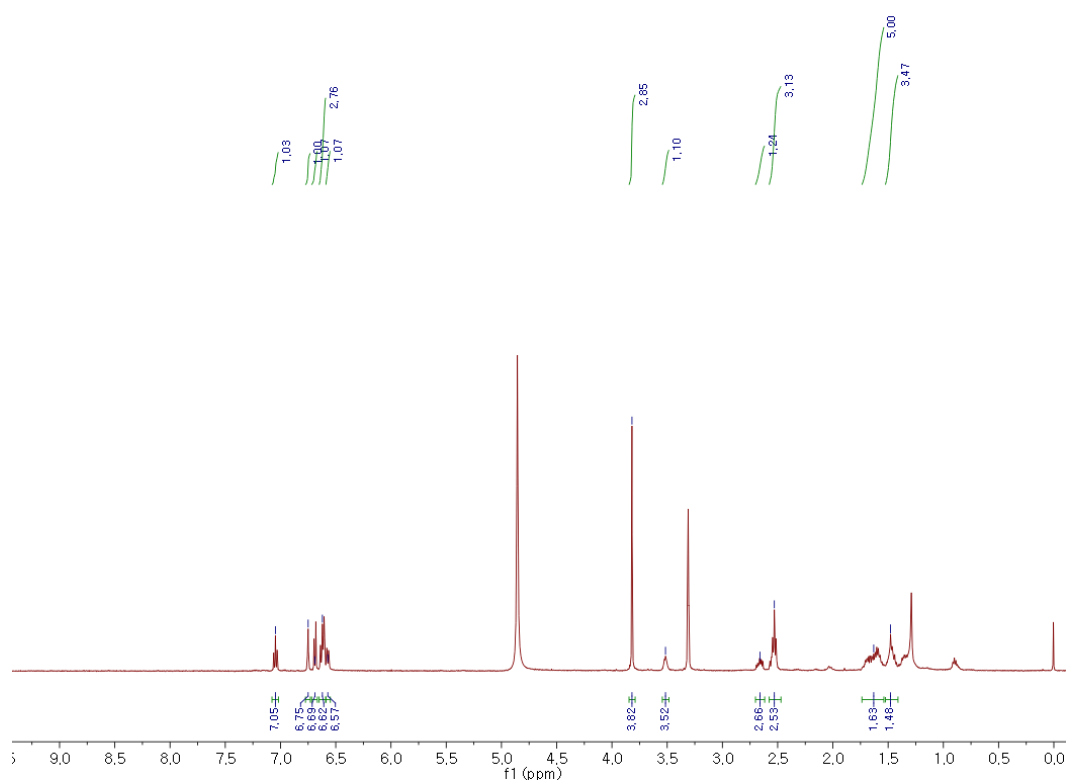

**Figure S40.** <sup>1</sup>H-NMR (CD<sub>3</sub>OD, 500 MHz) spectrum of 6.

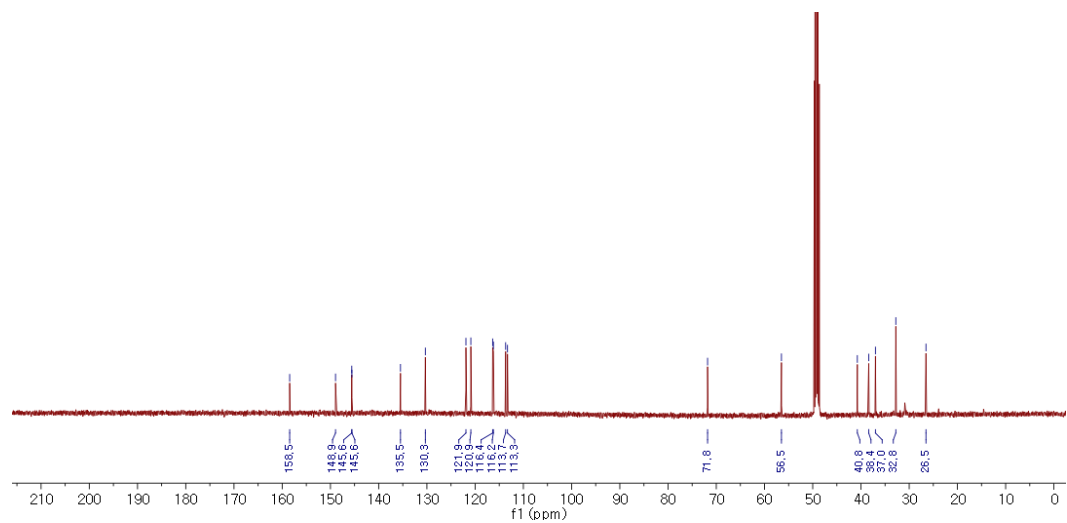

**Figure S41.** <sup>13</sup>C-NMR (CD<sub>3</sub>OD, 125 MHz) spectrum of 6.

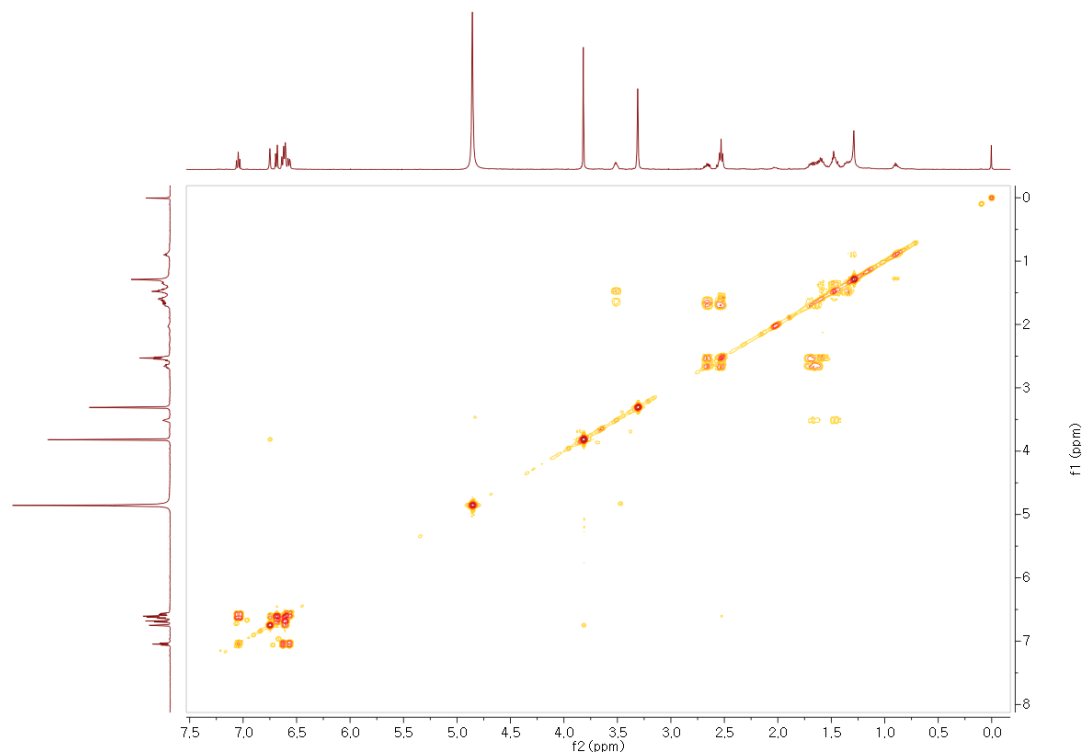

Figure S42. COSY spectrum of 6.

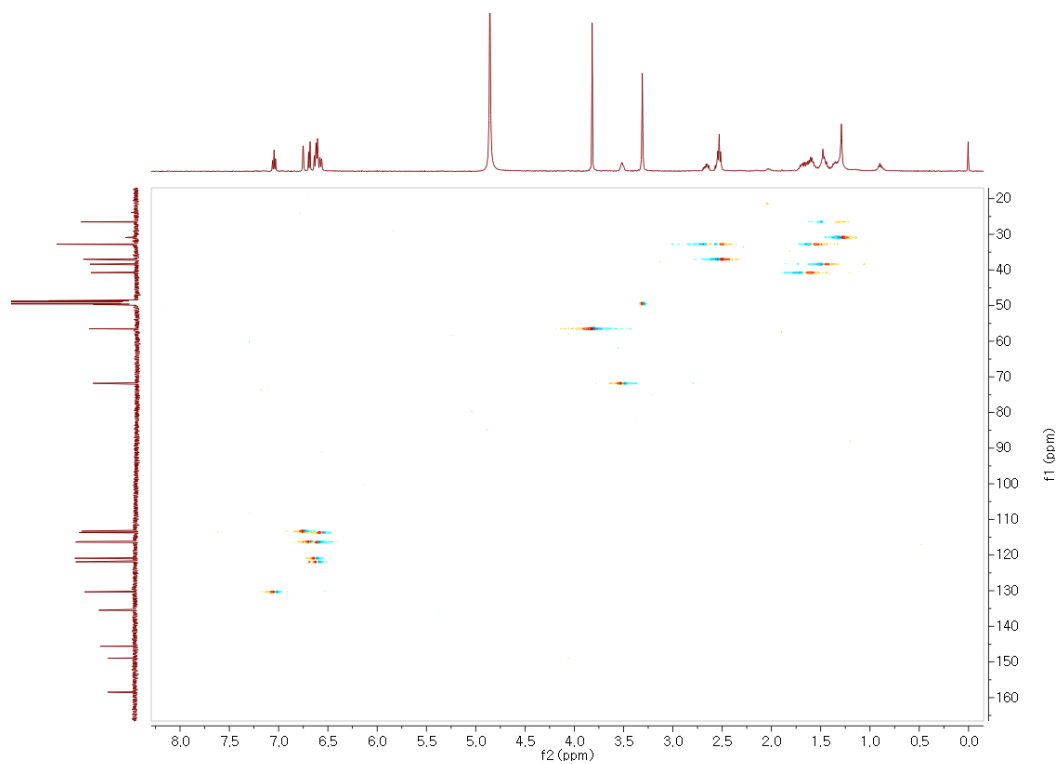

Figure S43. HSQC spectrum of 6.

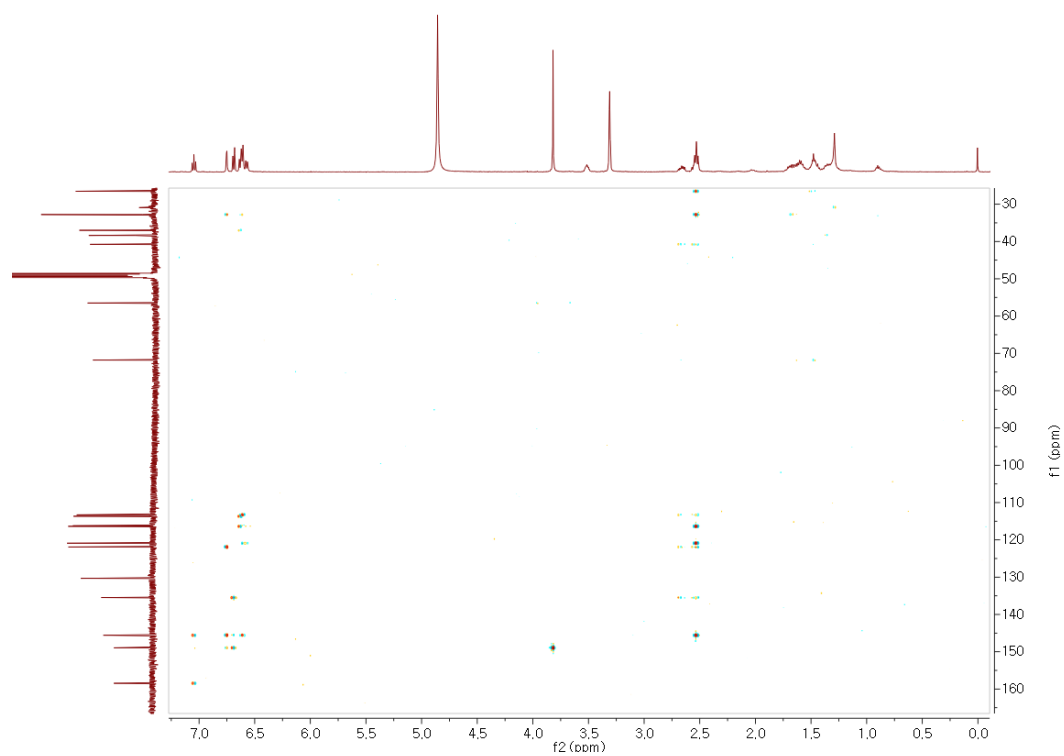

**Figure S44.** HMBC spectrum of **6**.



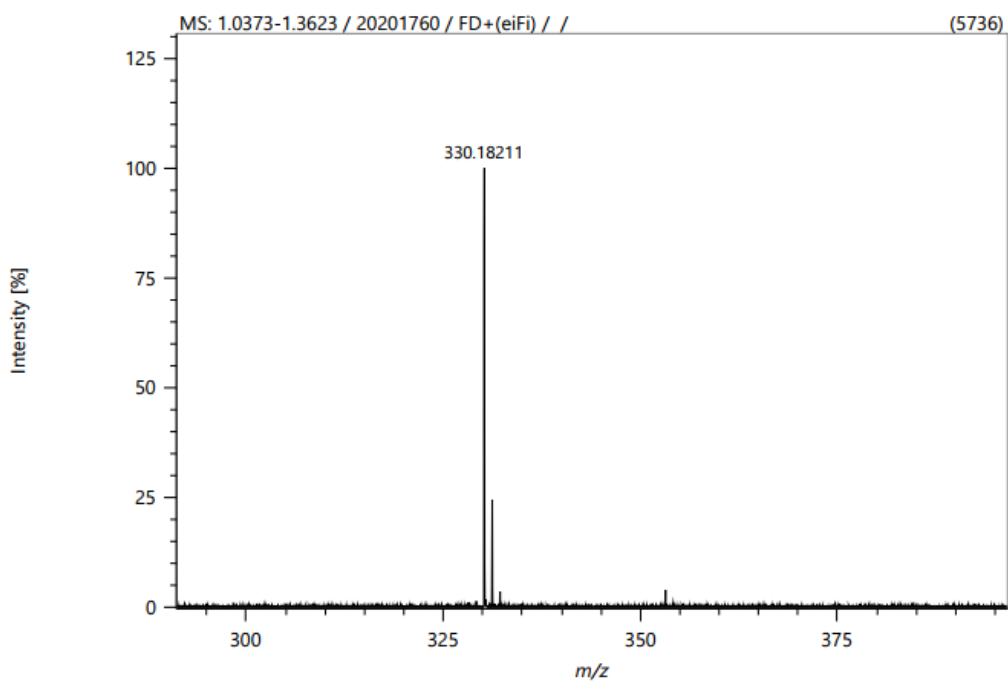

#### Elemental Composition

##### Parameters

Tolerance: 30.00 mDa  
 Electron: Odd/Even  
 Charge: +1  
 DBE: -90.0 - 90.0

##### Elements Set 1:

| Symbol | C  | H  | O |
|--------|----|----|---|
| Min    | 5  | 5  | 1 |
| Max    | 20 | 26 | 4 |

#### Results

| Mass      | Intensity | Formula                                        | Calculated Mass | Mass Difference [mDa] | Mass Difference [ppm] | DBE |
|-----------|-----------|------------------------------------------------|-----------------|-----------------------|-----------------------|-----|
| 330.18211 | 5736.45   | C <sub>20</sub> H <sub>26</sub> O <sub>4</sub> | 330.18256       | -0.45                 | -1.36                 | 8.0 |

Figure S45. HRFDMS spectrum of **6**.

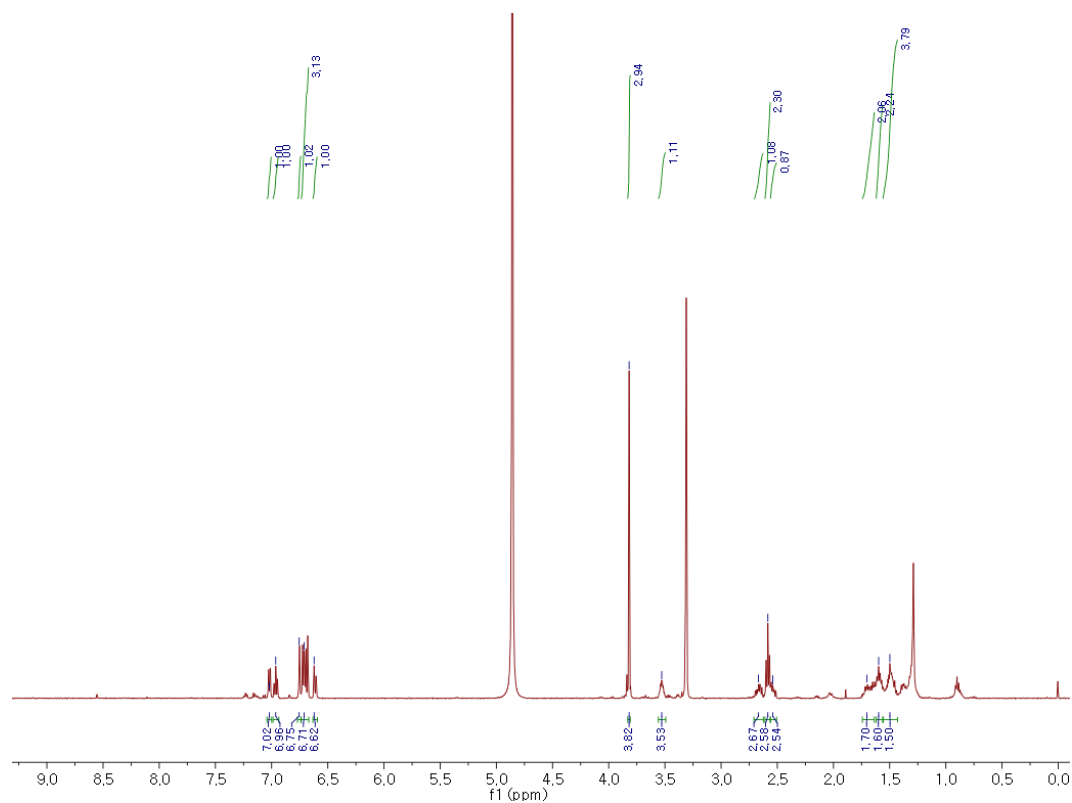

Figure S46. <sup>1</sup>H-NMR (CD<sub>3</sub>OD, 500 MHz) spectrum of 7.

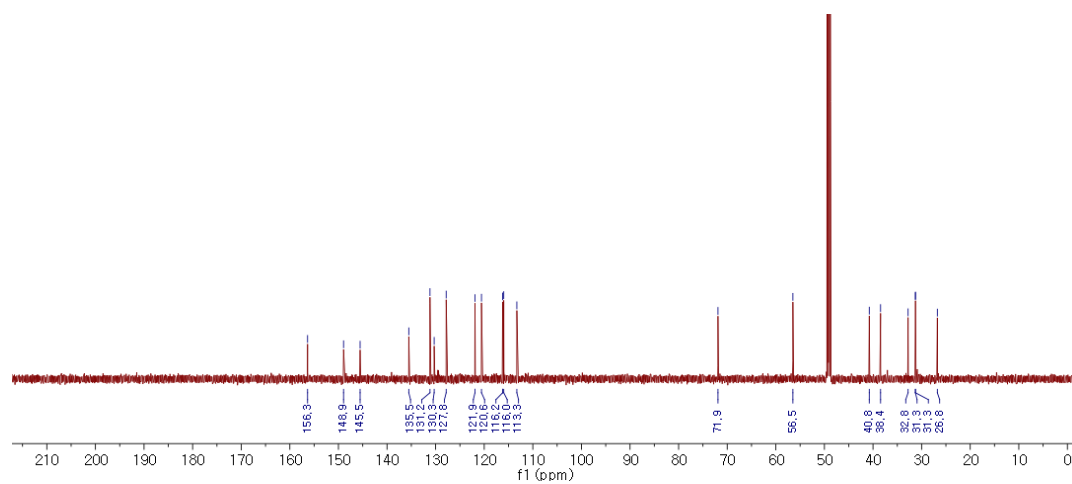

Figure S47. <sup>13</sup>C-NMR (CD<sub>3</sub>OD, 125 MHz) spectrum of 7.

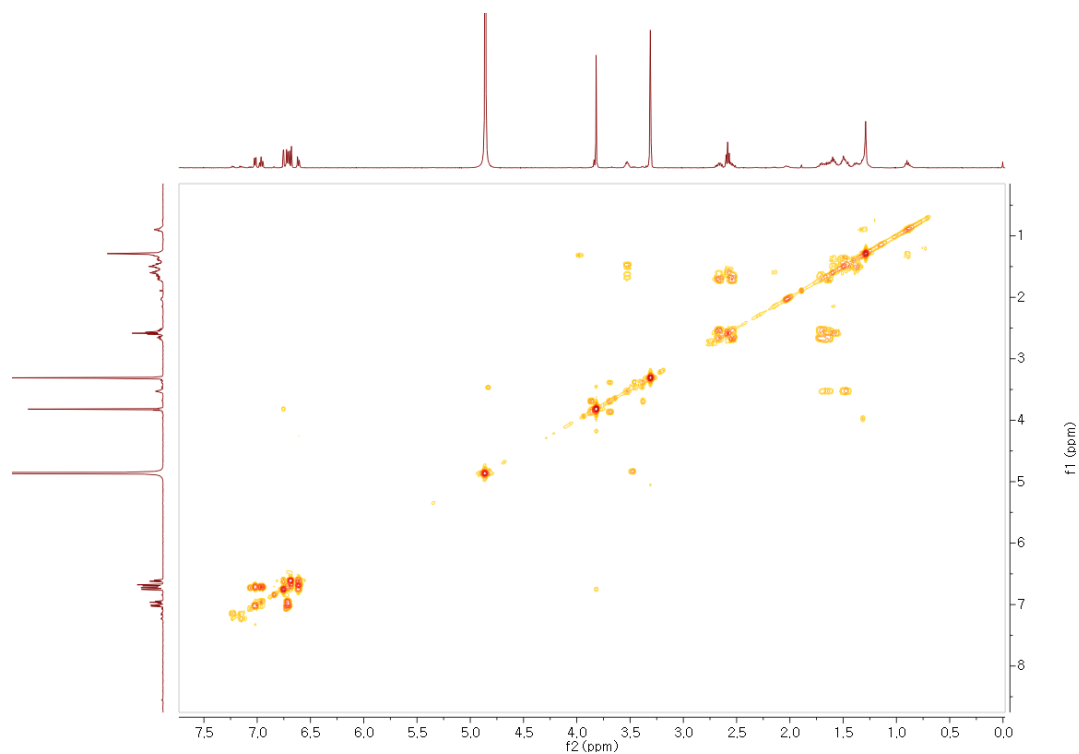

Figure S48. COSY spectrum of 7.

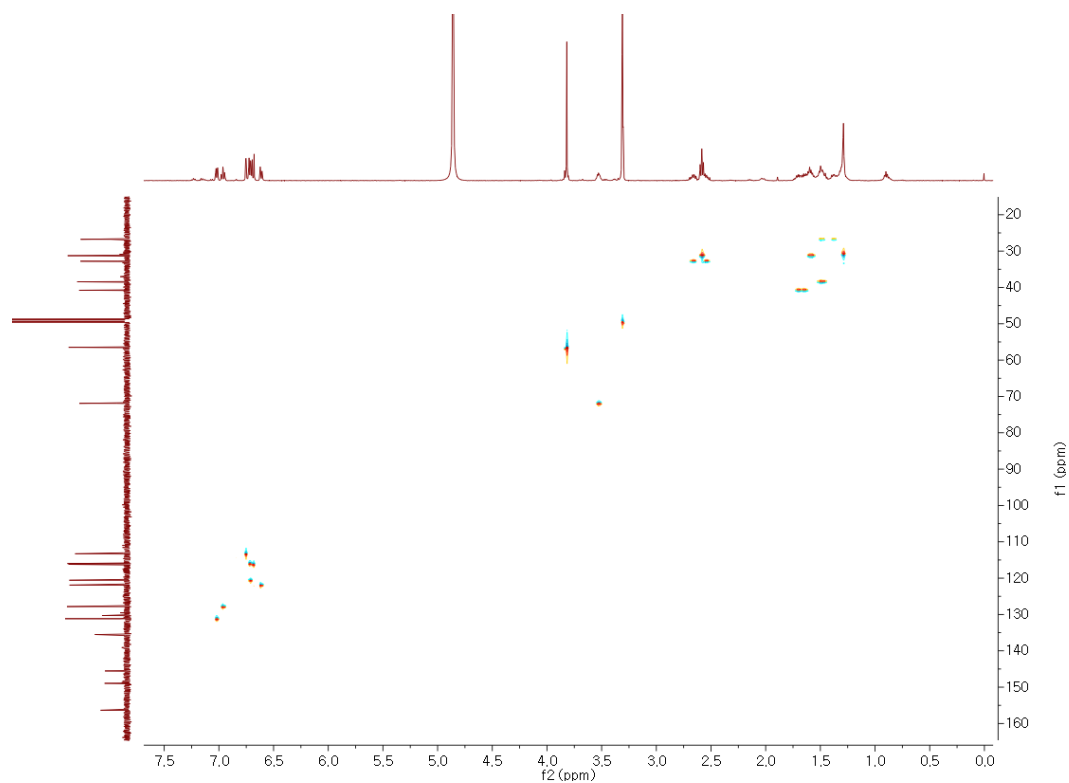

Figure S49. HSQC spectrum of 7.

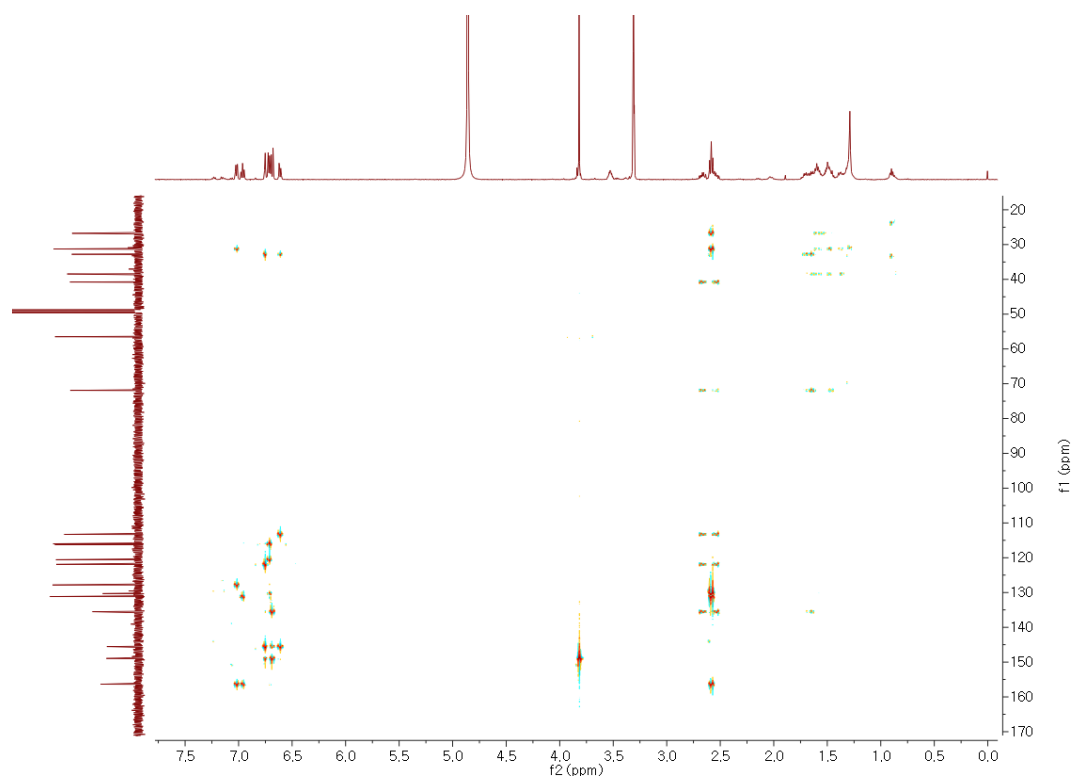

**Figure S50.** HMBC spectrum of **7**.

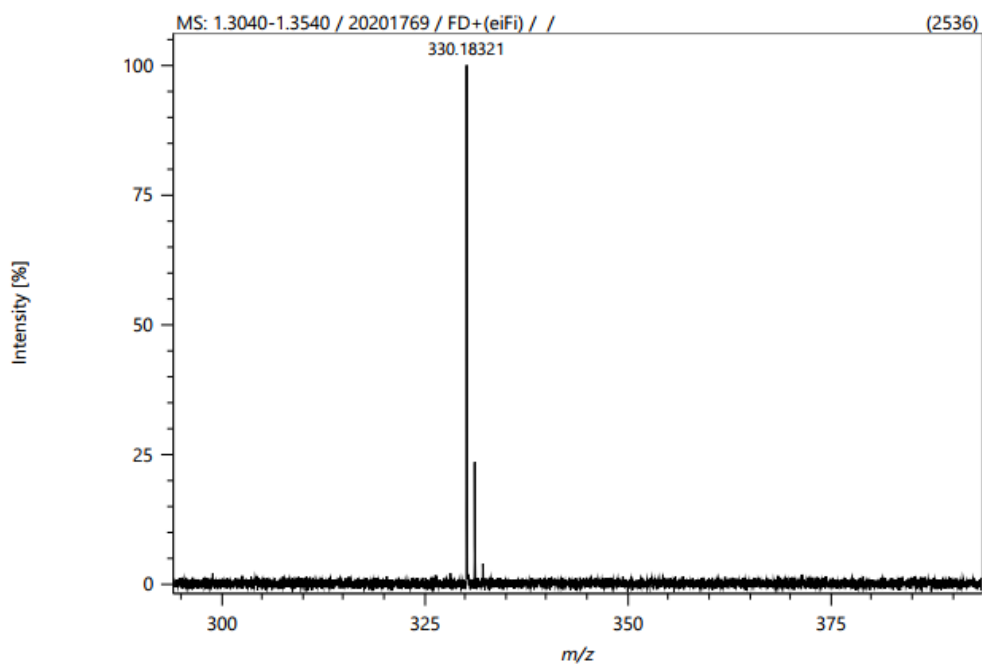

#### Elemental Composition

##### Parameters

Tolerance: 30.00 mDa  
 Electron: Odd/Even  
 Charge: +1  
 DBE: -90.0 - 90.0

##### Elements Set 1:

| Symbol | C  | H  | O |
|--------|----|----|---|
| Min    | 5  | 5  | 1 |
| Max    | 20 | 26 | 4 |

#### Results

| Mass      | Intensity | Formula                                        | Calculated Mass | Mass Difference [mDa] | Mass Difference [ppm] | DBE |
|-----------|-----------|------------------------------------------------|-----------------|-----------------------|-----------------------|-----|
| 330.18321 | 2535.95   | C <sub>20</sub> H <sub>26</sub> O <sub>4</sub> | 330.18256       | 0.65                  | 1.97                  | 8.0 |

Figure S51. HRFDMS spectrum of **7**.

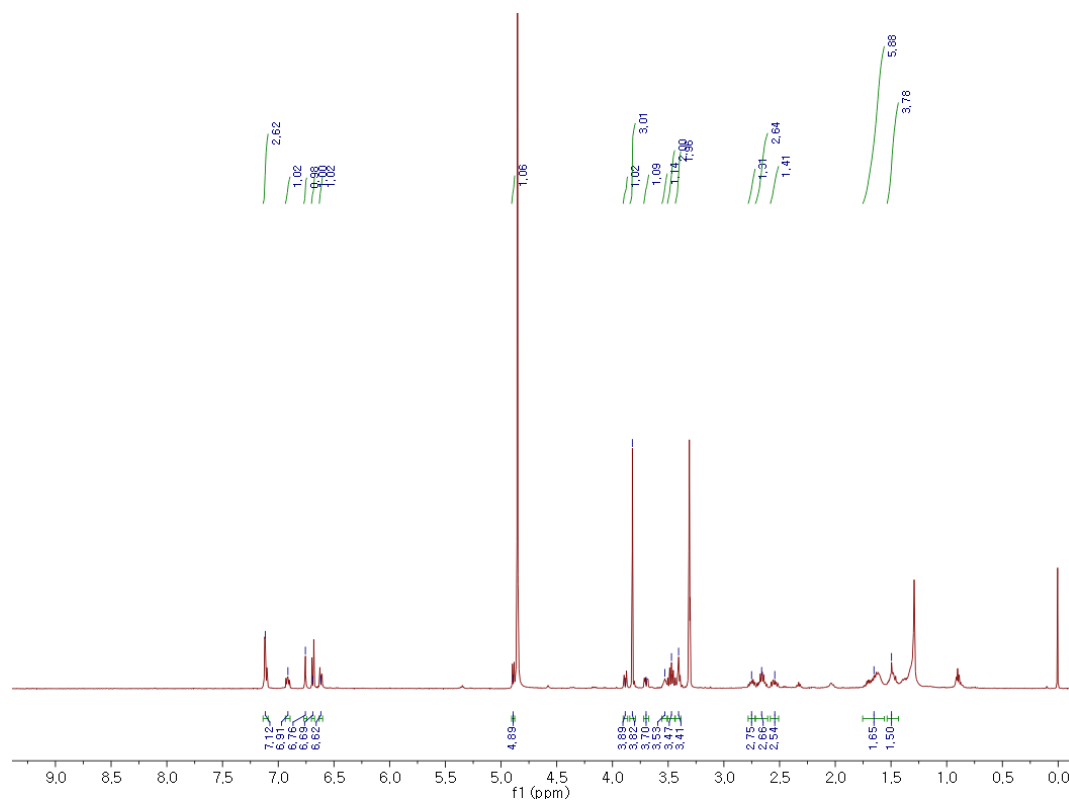

**Figure S52.**  $^1\text{H}$ -NMR ( $\text{CD}_3\text{OD}$ , 500 MHz) spectrum of **8**.

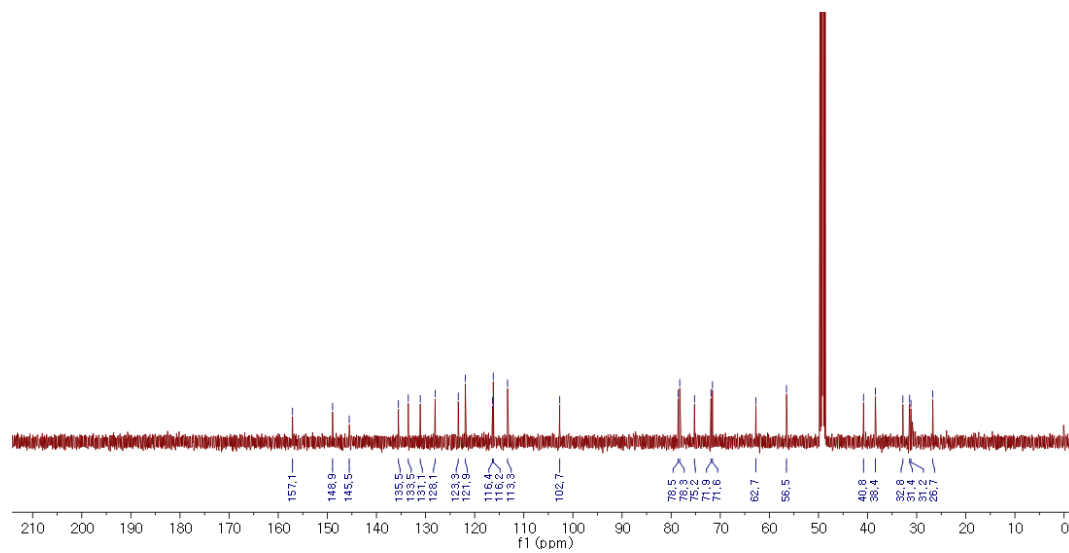

**Figure S53.**  $^{13}\text{C}$ -NMR ( $\text{CD}_3\text{OD}$ , 125 MHz) spectrum of **8**.

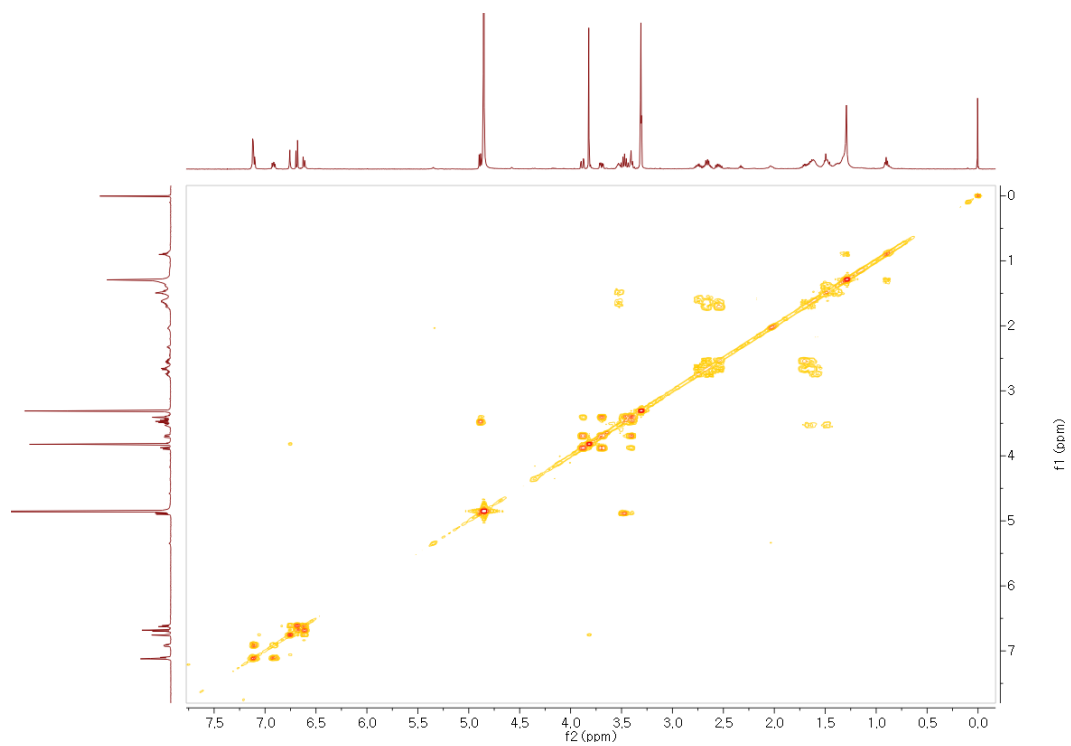

Figure S54. COSY spectrum of **8**.

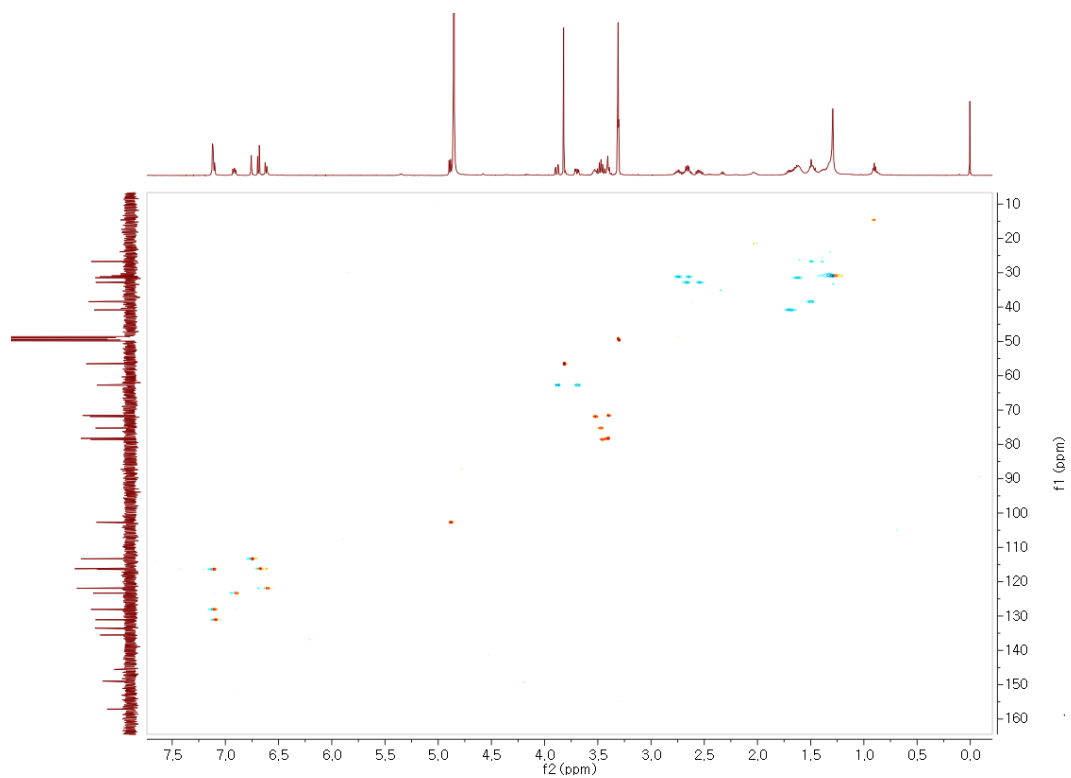

Figure S55. HSQC spectrum of **8**.

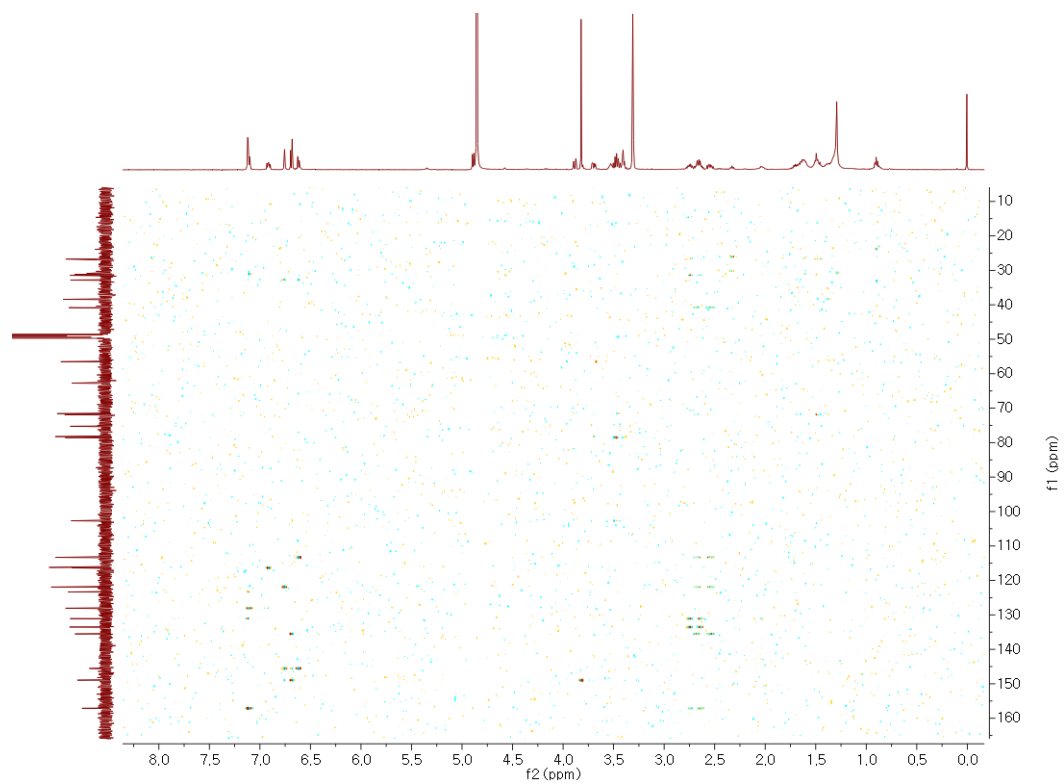

Figure S56. HMBC spectrum of 8.



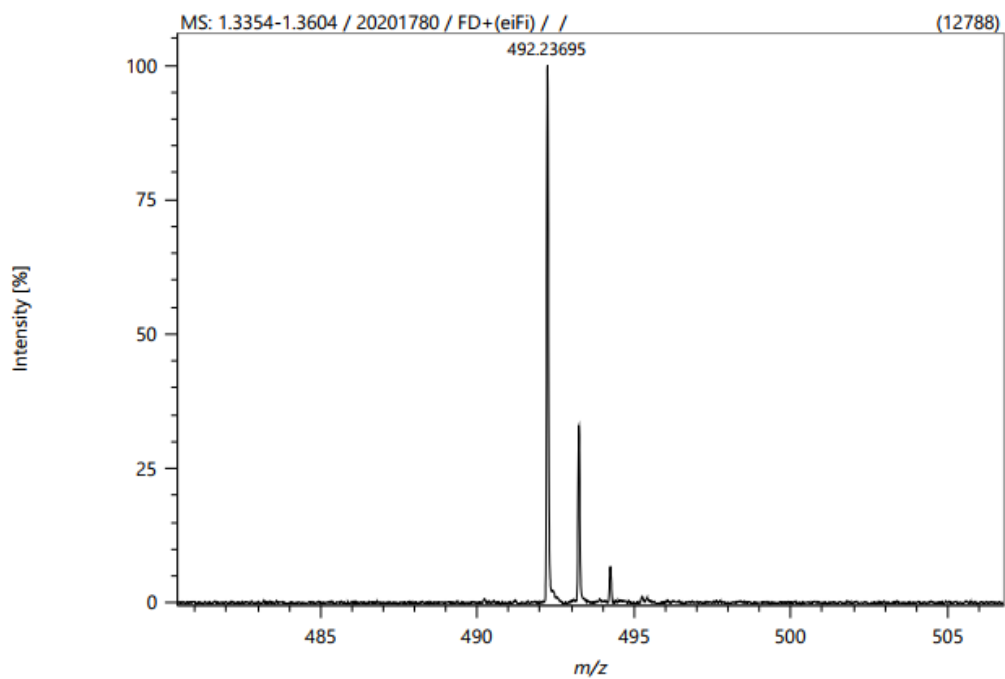

#### Elemental Composition

##### Parameters

Tolerance: 30.00 mDa  
 Electron: Odd/Even  
 Charge: +1  
 DBE: -90.0 - 90.0

##### Elements Set 1:

| Symbol | C  | H  | O |
|--------|----|----|---|
| Min    | 5  | 5  | 1 |
| Max    | 26 | 36 | 9 |

#### Results

| Mass      | Intensity | Formula                                        | Calculated Mass | Mass Difference [mDa] | Mass Difference [ppm] | DBE |
|-----------|-----------|------------------------------------------------|-----------------|-----------------------|-----------------------|-----|
| 492.23695 | 12787.86  | C <sub>26</sub> H <sub>36</sub> O <sub>9</sub> | 492.23538       | 1.56                  | 3.17                  | 9.0 |

Figure S57. HRFDMS spectrum of **8**.

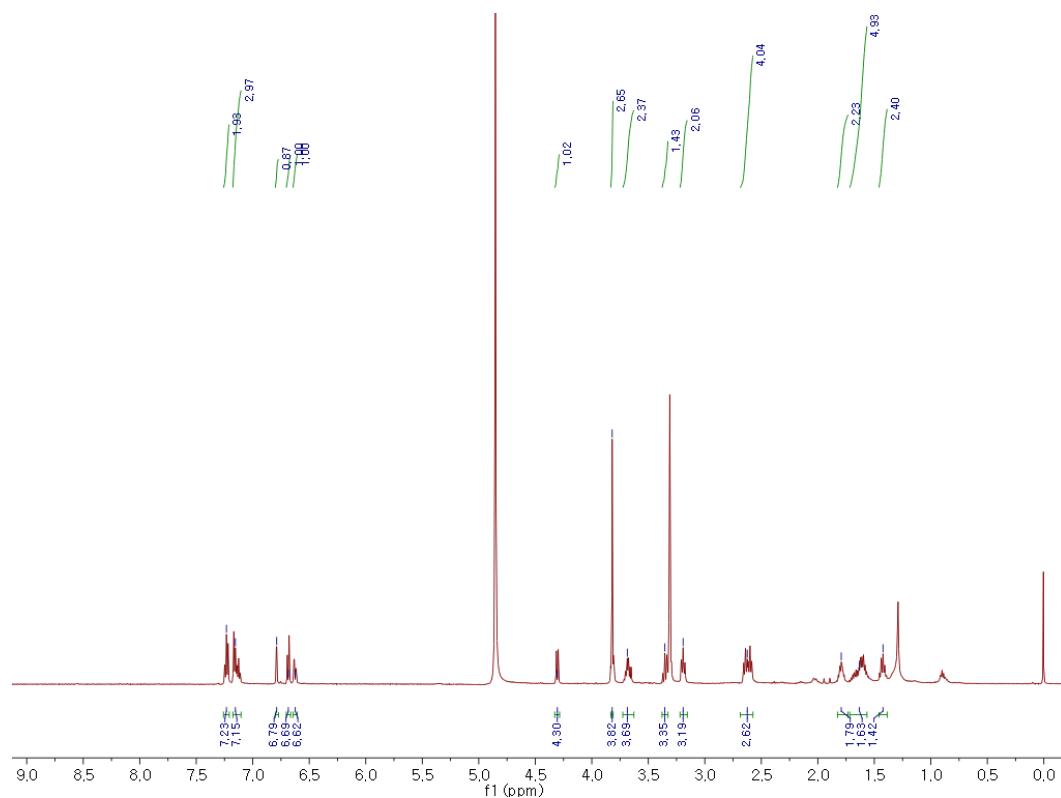

**Figure S58.** <sup>1</sup>H-NMR (CD<sub>3</sub>OD, 500 MHz) spectrum of 9.

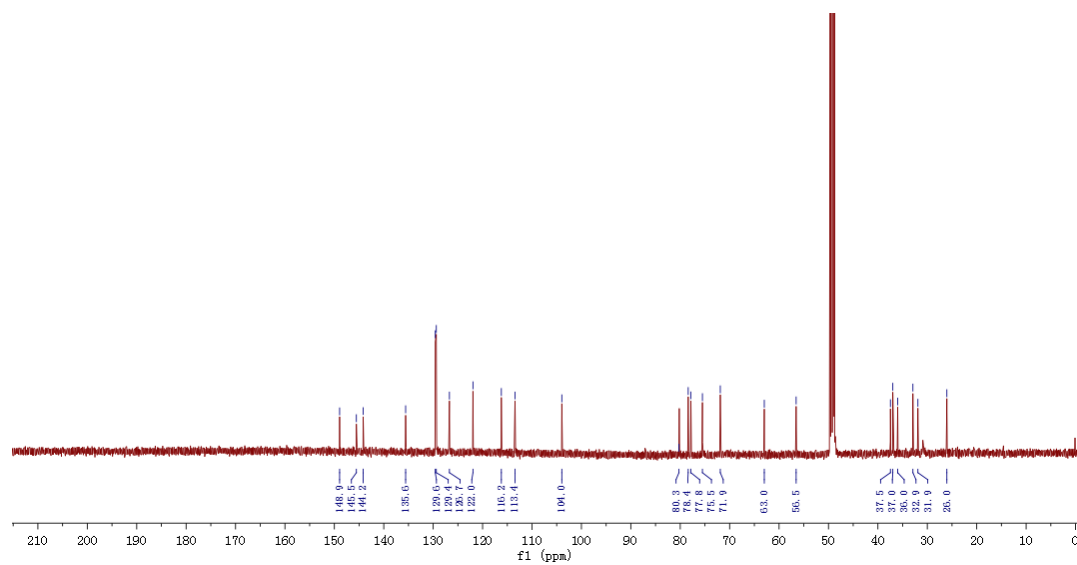

**Figure S59.** <sup>13</sup>C-NMR (CD<sub>3</sub>OD, 125 MHz) spectrum of 9.

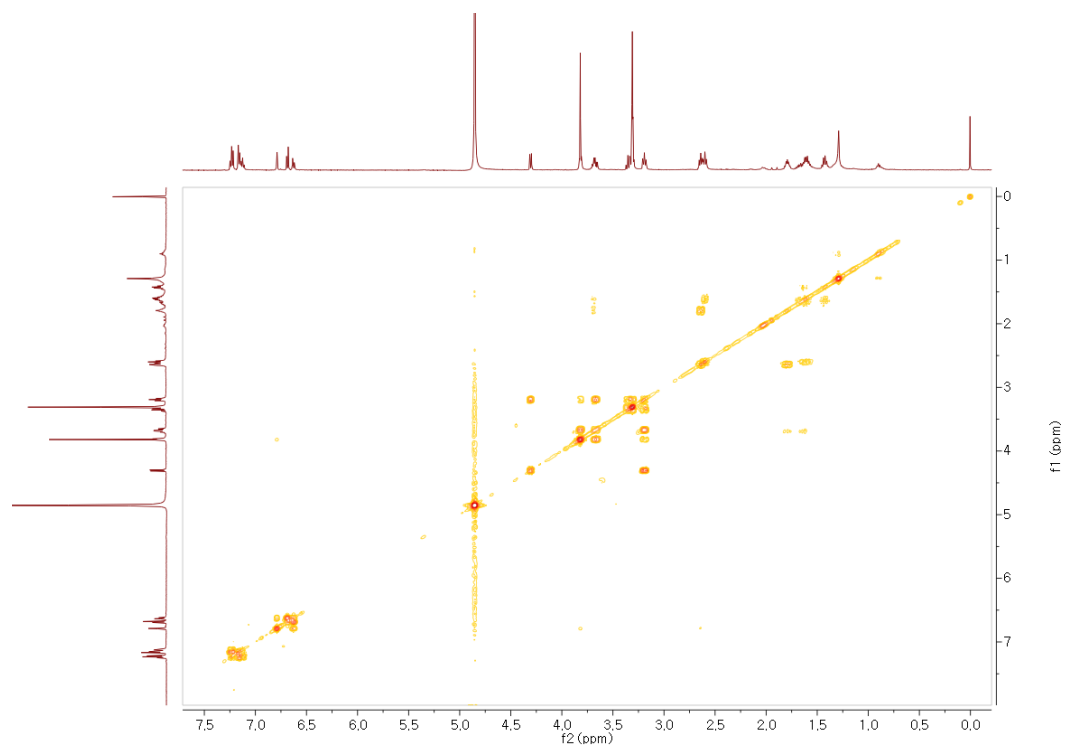

Figure S60. COSY spectrum of **9**.

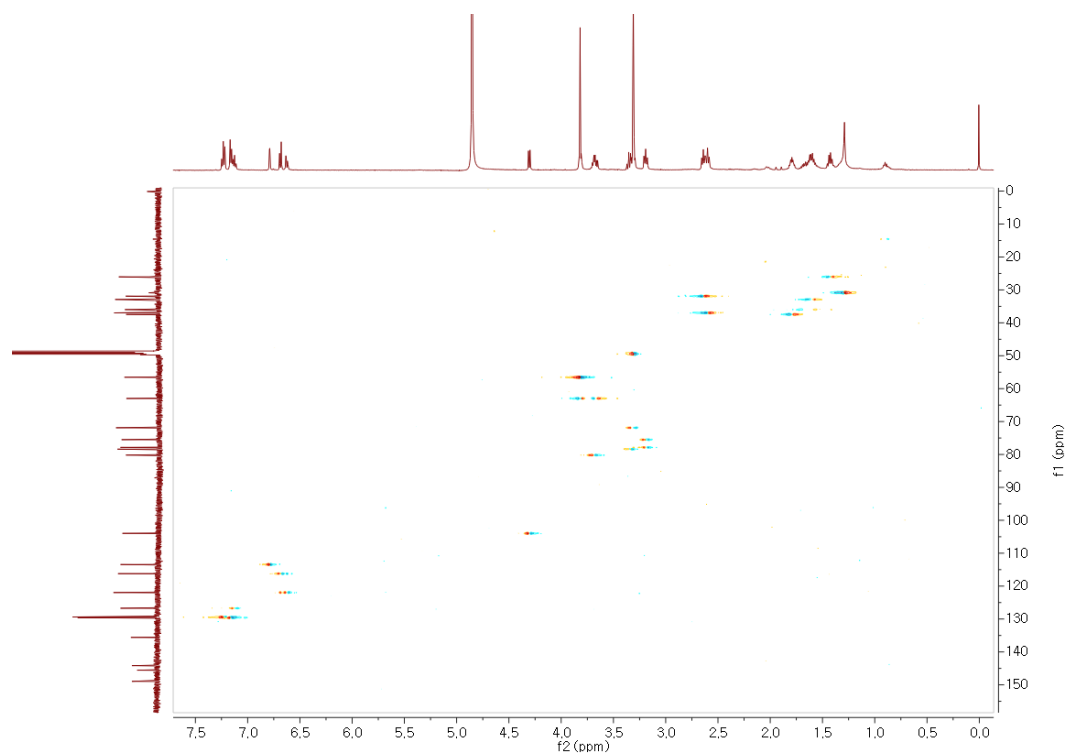

Figure S61. HSQC spectrum of **9**.

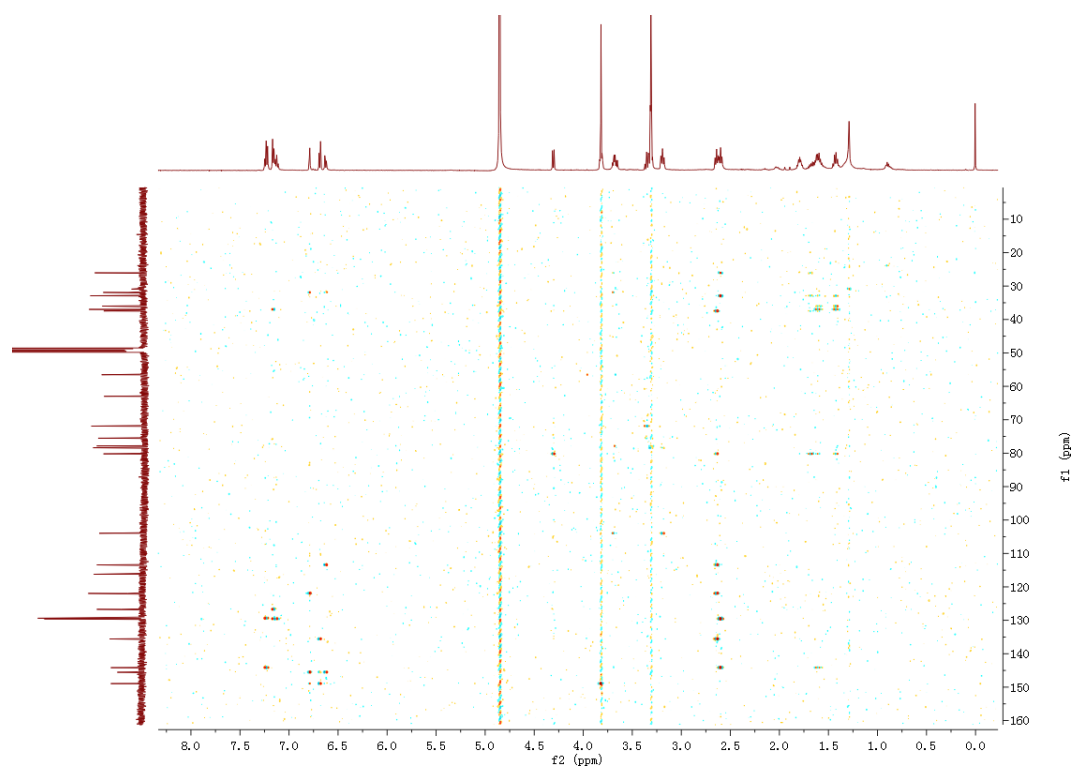

**Figure S62.** HMBC spectrum of **9**.

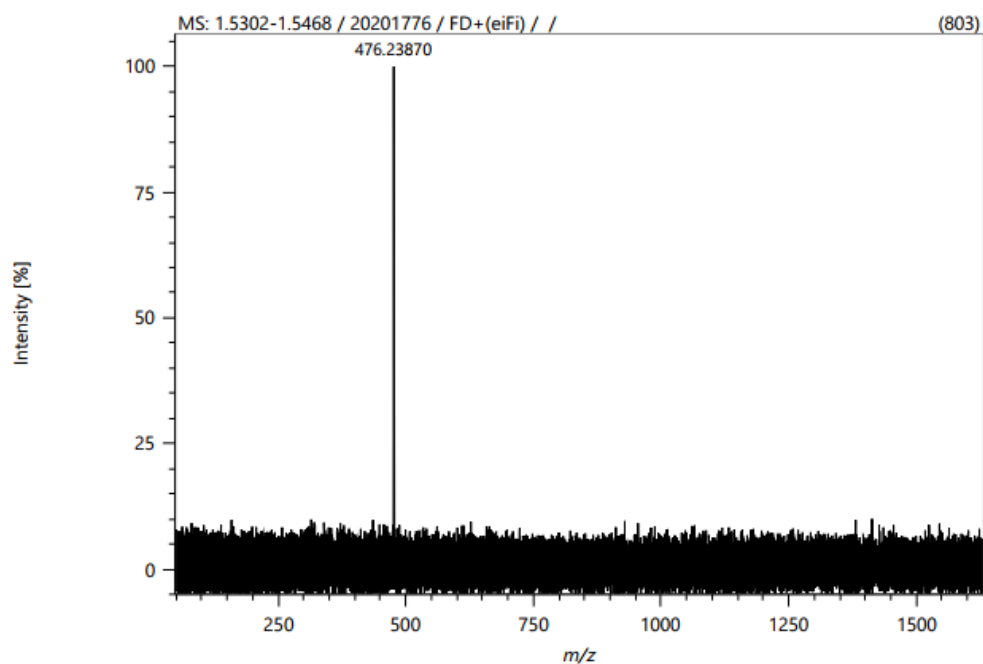

#### Elemental Composition

| Parameters |              | Elements Set 1: |    |    |   |
|------------|--------------|-----------------|----|----|---|
| Tolerance: | 30.00 mDa    | Symbol          | C  | H  | O |
| Electron:  | Odd/Even     | Min             | 5  | 5  | 1 |
| Charge:    | +1           | Max             | 26 | 36 | 8 |
| DBE:       | -90.0 - 90.0 |                 |    |    |   |

#### Results

| Mass      | Intensity | Formula                                        | Calculated Mass | Mass Difference [mDa] | Mass Difference [ppm] | DBE |
|-----------|-----------|------------------------------------------------|-----------------|-----------------------|-----------------------|-----|
| 476.23870 | 802.98    | C <sub>26</sub> H <sub>36</sub> O <sub>8</sub> | 476.24047       | -1.77                 | -3.72                 | 9.0 |

Figure S63. HRFDMS spectrum of **9**.

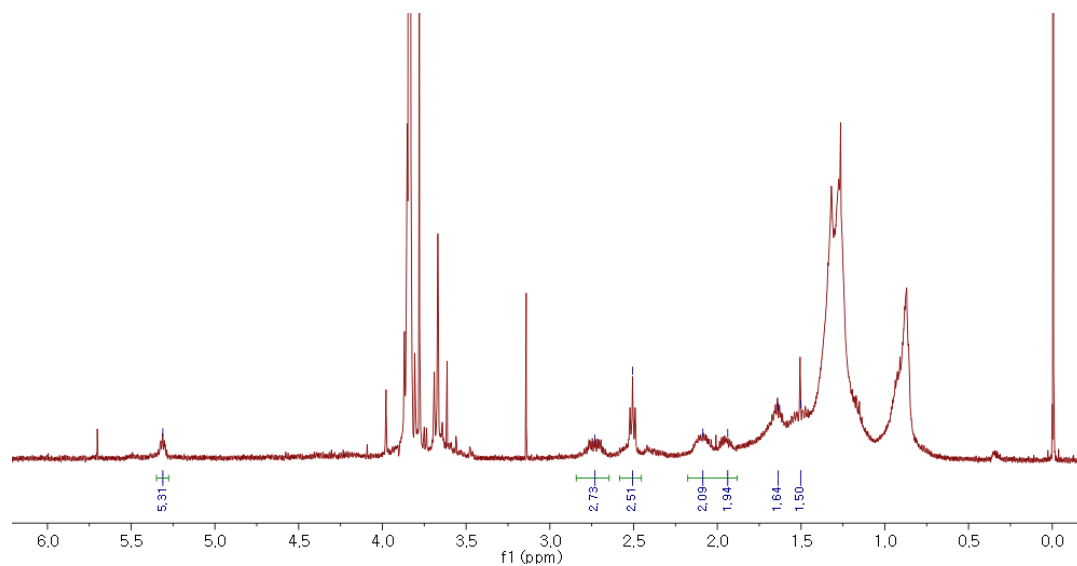

**Figure S64.**  $^1\text{H}$ -NMR (pyridine- $d_5$ , 500 MHz) spectrum of (S)-MTPA ester of **2**.

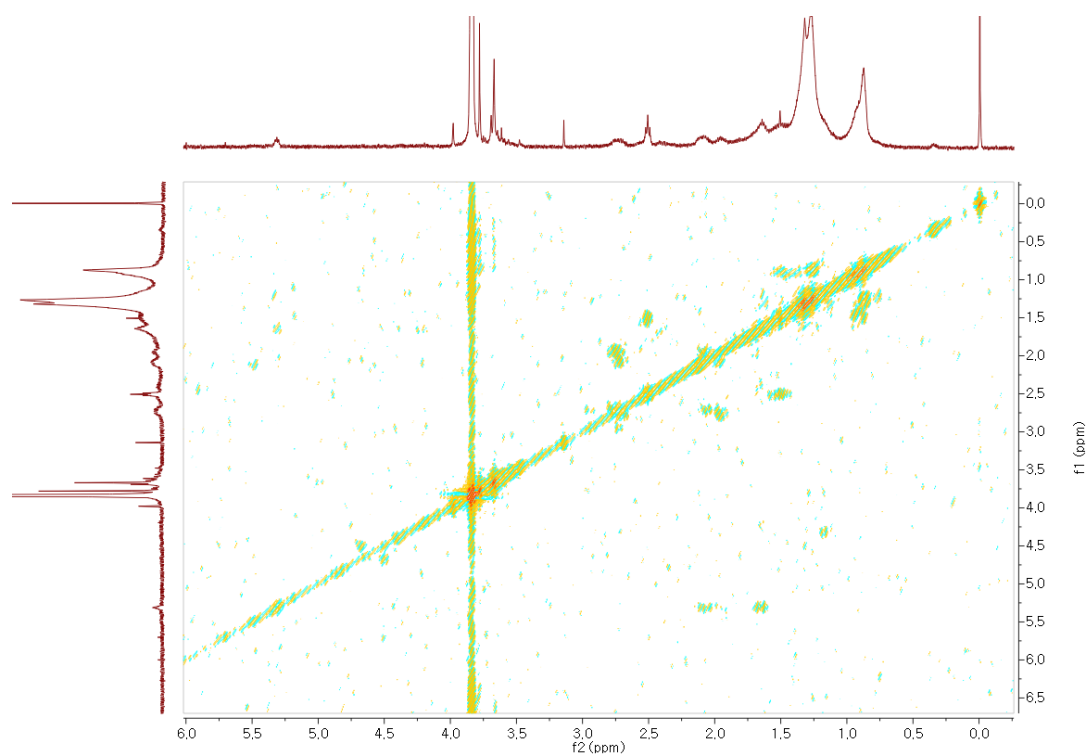

**Figure S65.** COSY spectrum of (S)-MTPA ester of **2**.

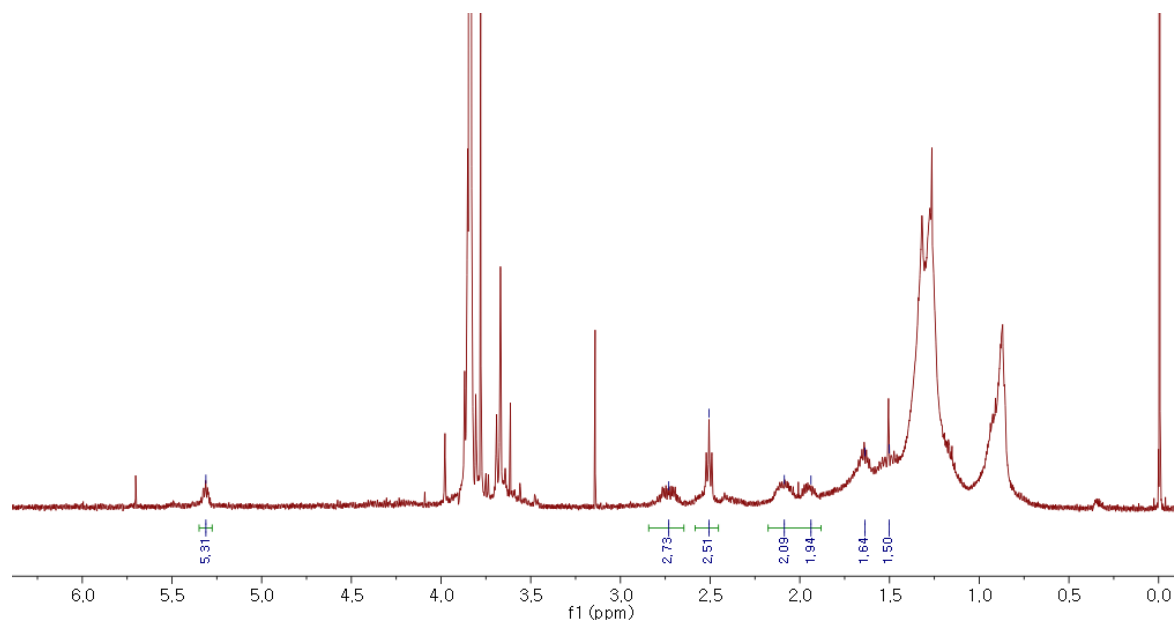

**Figure S66.**  $^1\text{H}$ -NMR (pyridine- $d_5$ , 500 MHz) spectrum of (*R*)-MTPA ester of **2**.

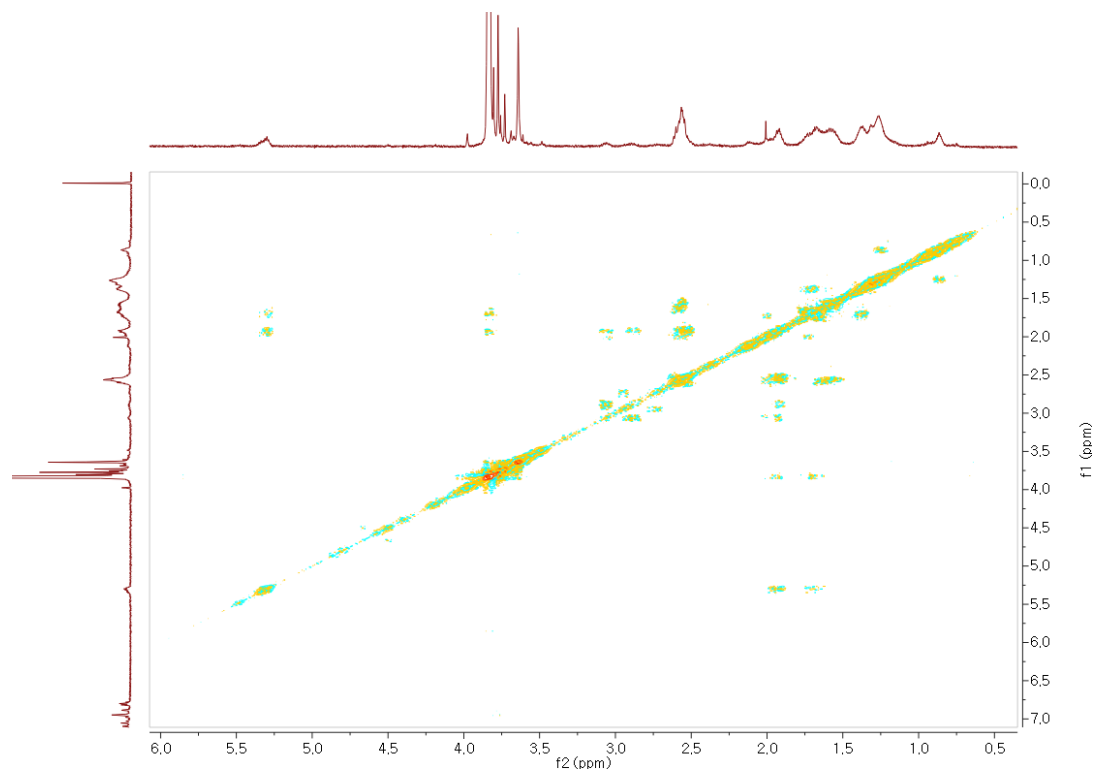

**Figure S67.** COSY spectrum of (*R*)-MTPA ester of **2**.

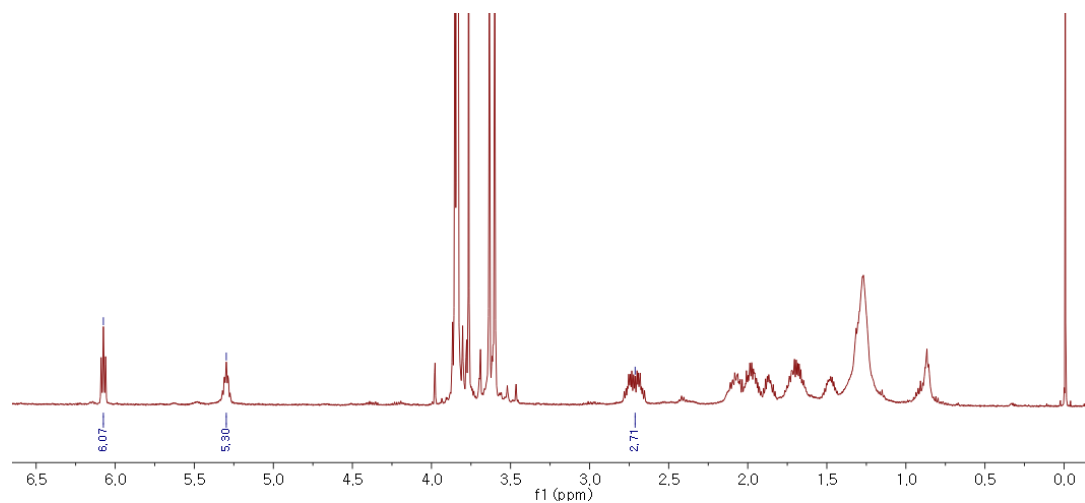

**Figure S68.**  $^1\text{H}$ -NMR (pyridine- $d_5$ , 500 MHz) spectrum of (S)-MTPA ester of **3a**.

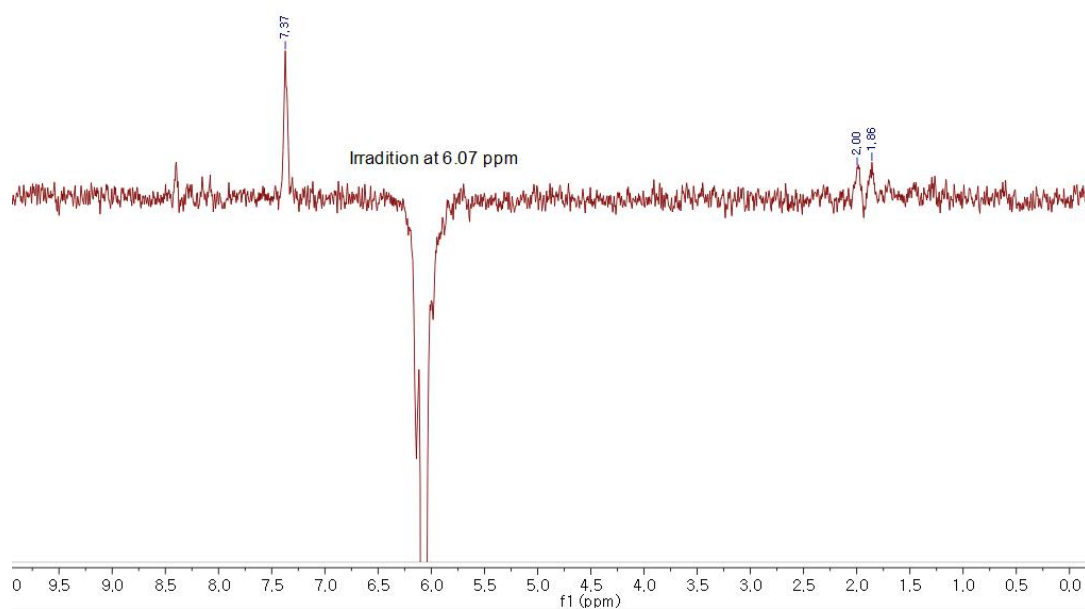

**Figure S69.** NOE spectrum of (S)-MTPA ester of **3a**.



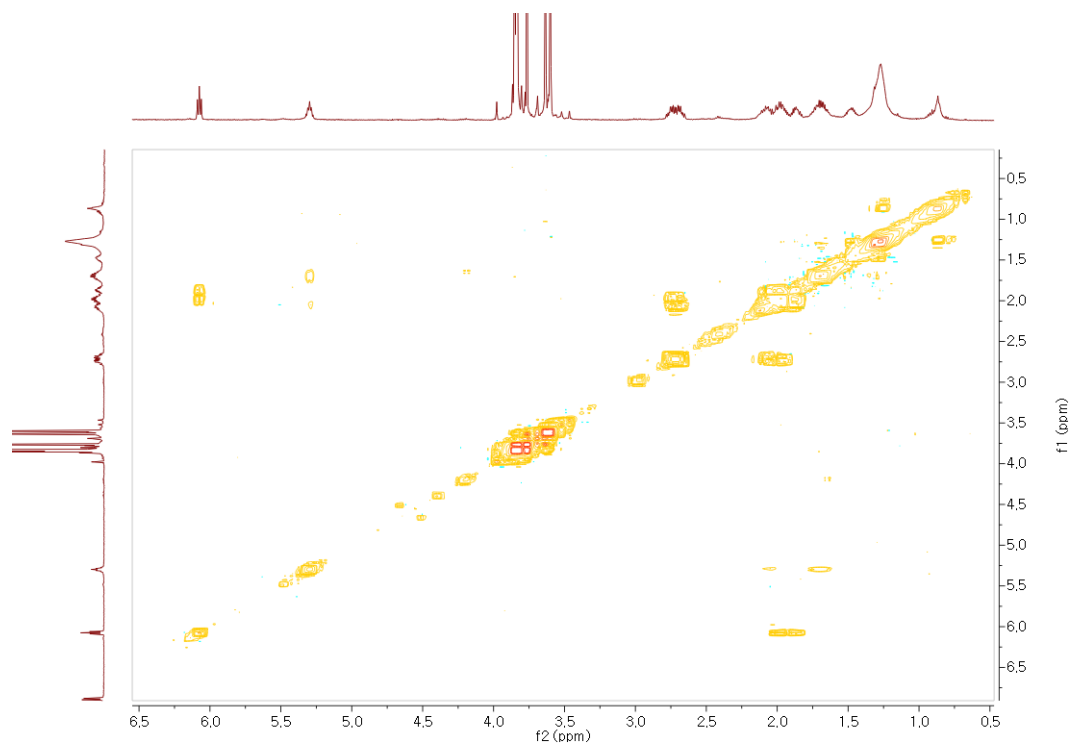

**Figure S70.** COSY spectrum of (*S*)-MTPA ester of **3a**.

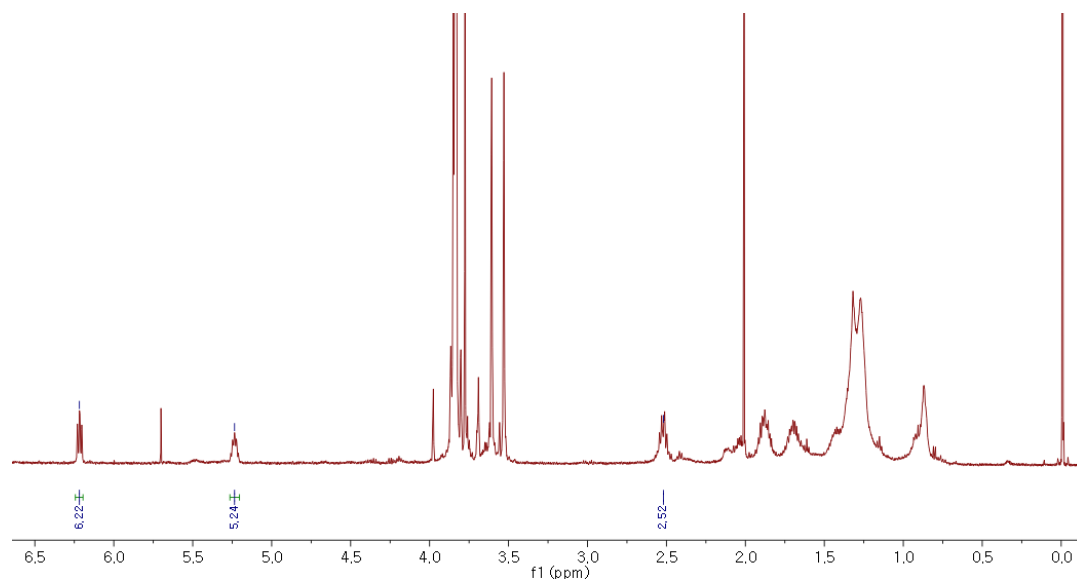

**Figure S71.**  $^1\text{H}$ -NMR (pyridine- $d_5$ , 500 MHz) spectrum of (*R*)-MTPA ester of **3a**.

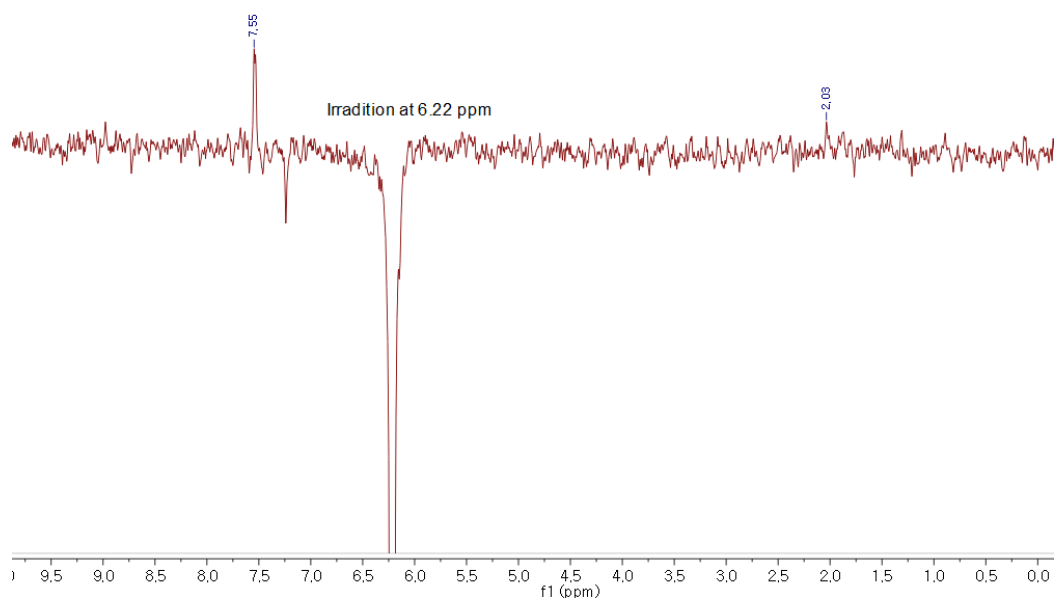

**Figure S72.** NOE spectrum of (R)-MTPA ester of 3a.

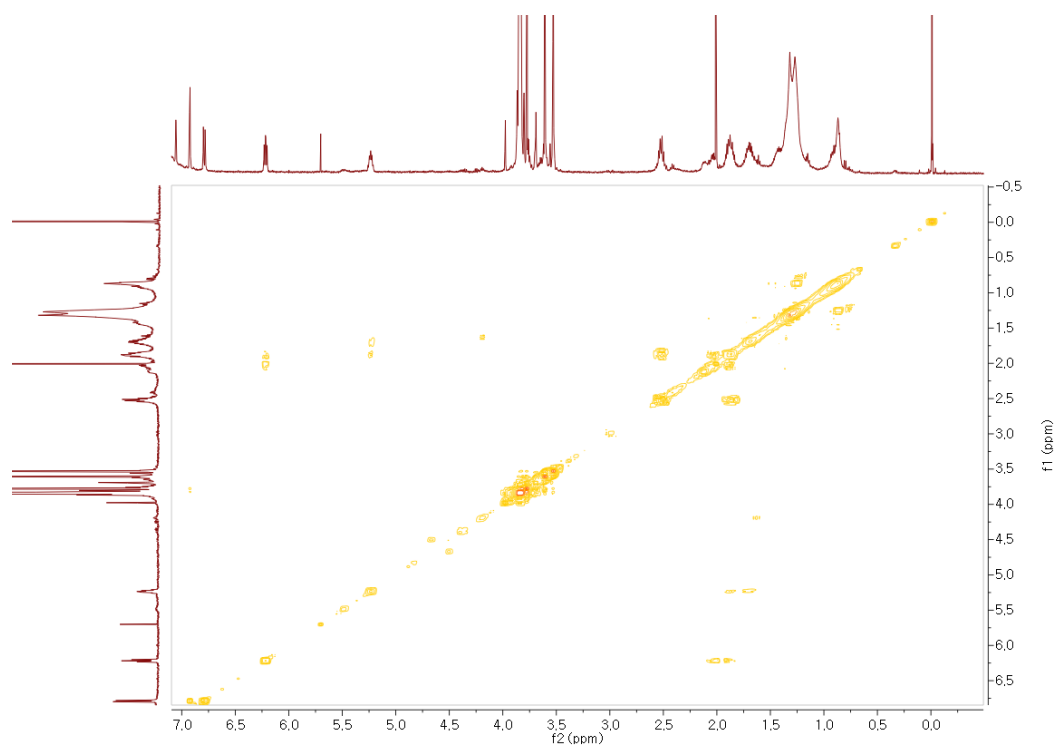

**Figure S73.** COSY spectrum of (R)-MTPA ester of 3a.

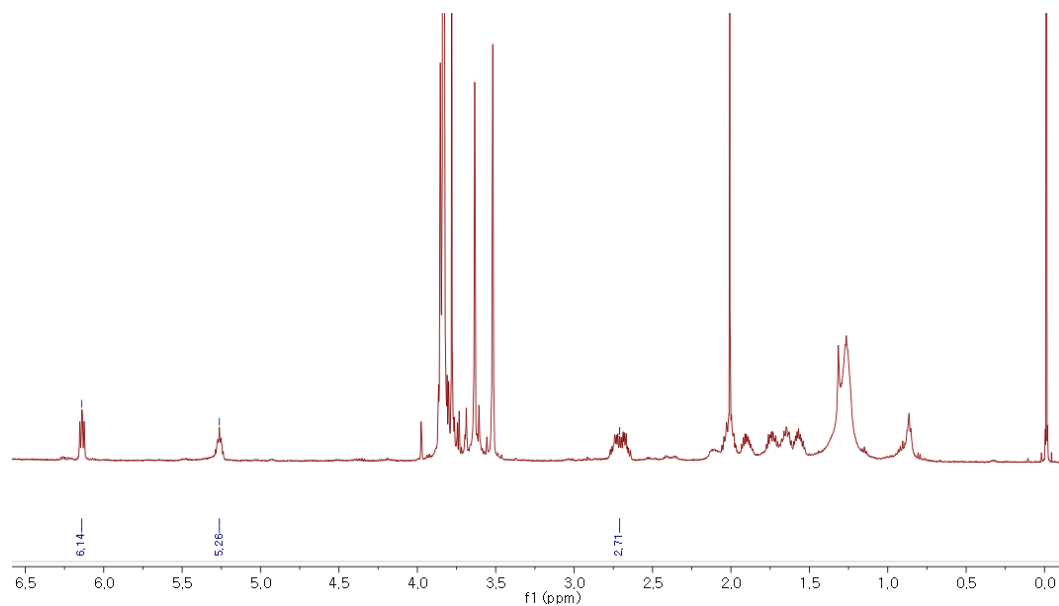

**Figure S74.**  $^1\text{H}$ -NMR (pyridine- $d_5$ , 500 MHz) spectrum of (S)-MTPA ester of **3b**.

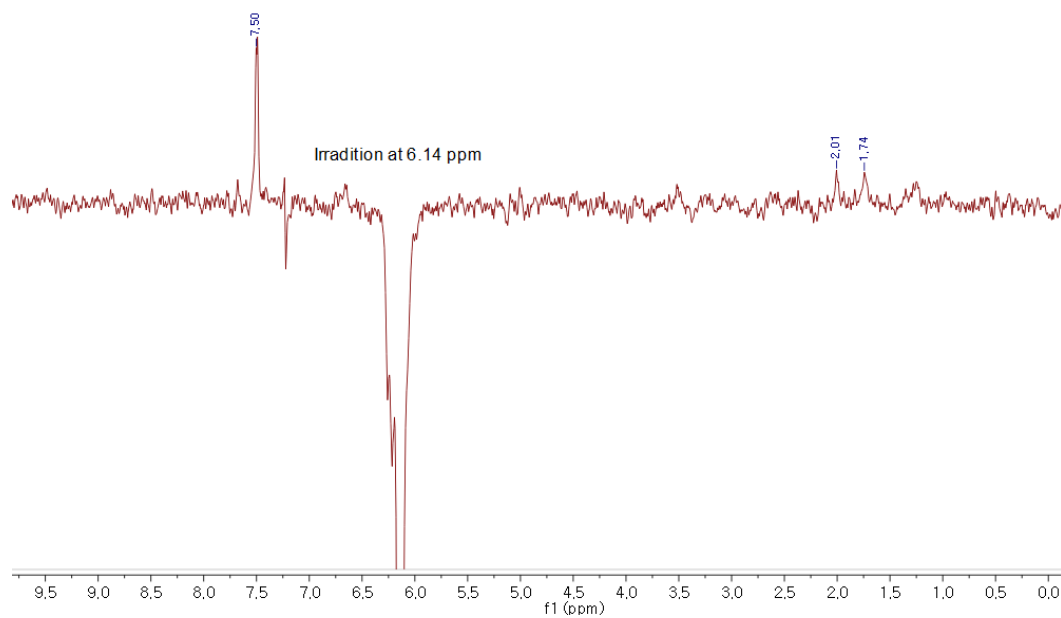

**Figure S75.** NOE spectrum of (S)-MTPA ester of **3b**.

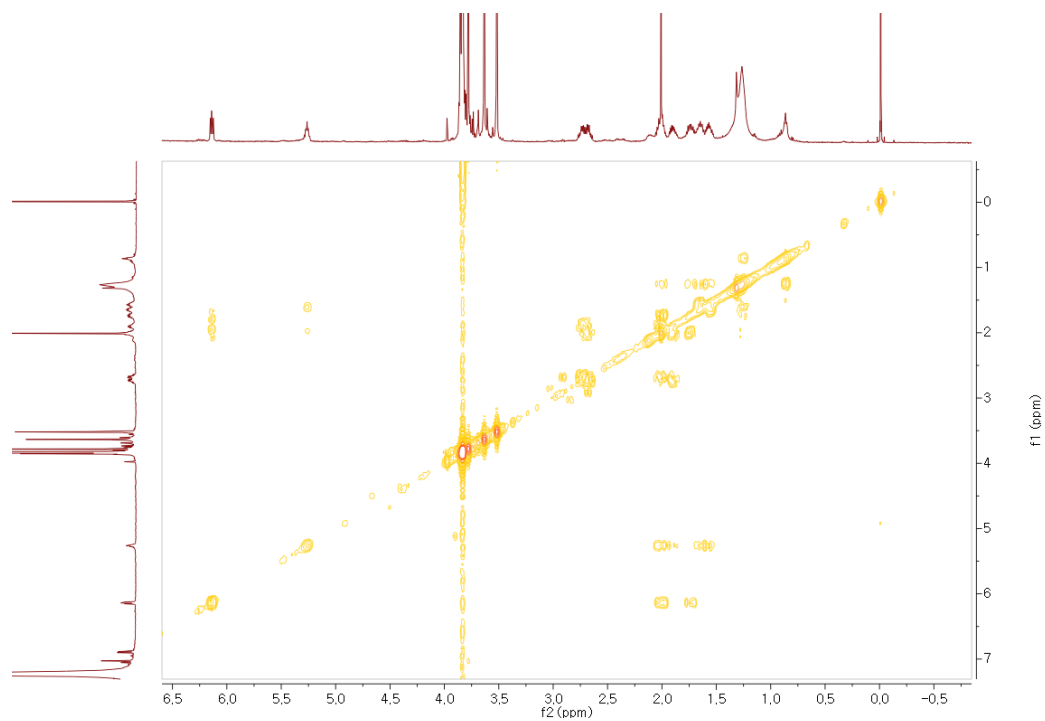

**Figure S76.** COSY spectrum of (*S*)-MTPA ester of **3b**.

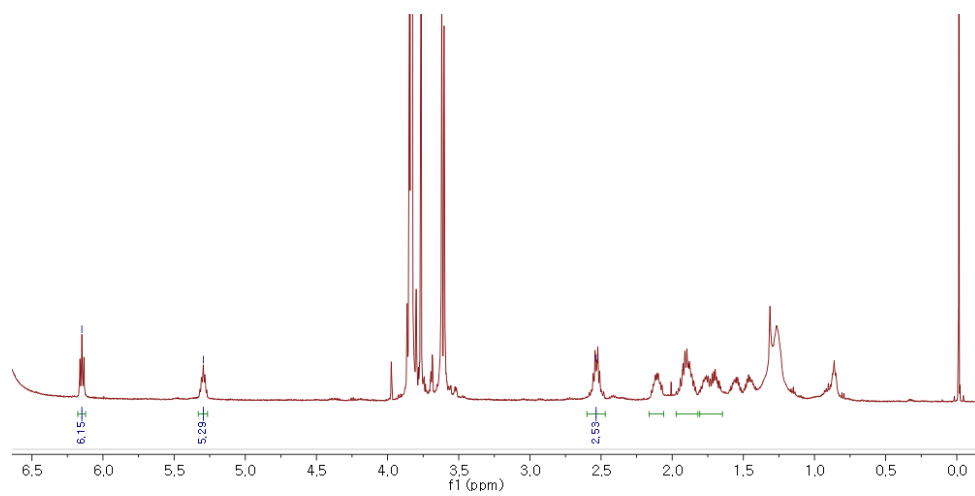

**Figure S77.**  $^1\text{H}$ -NMR (pyridine- $d_5$ , 500 MHz) spectrum of (*R*)-MTPA ester of **3b**.

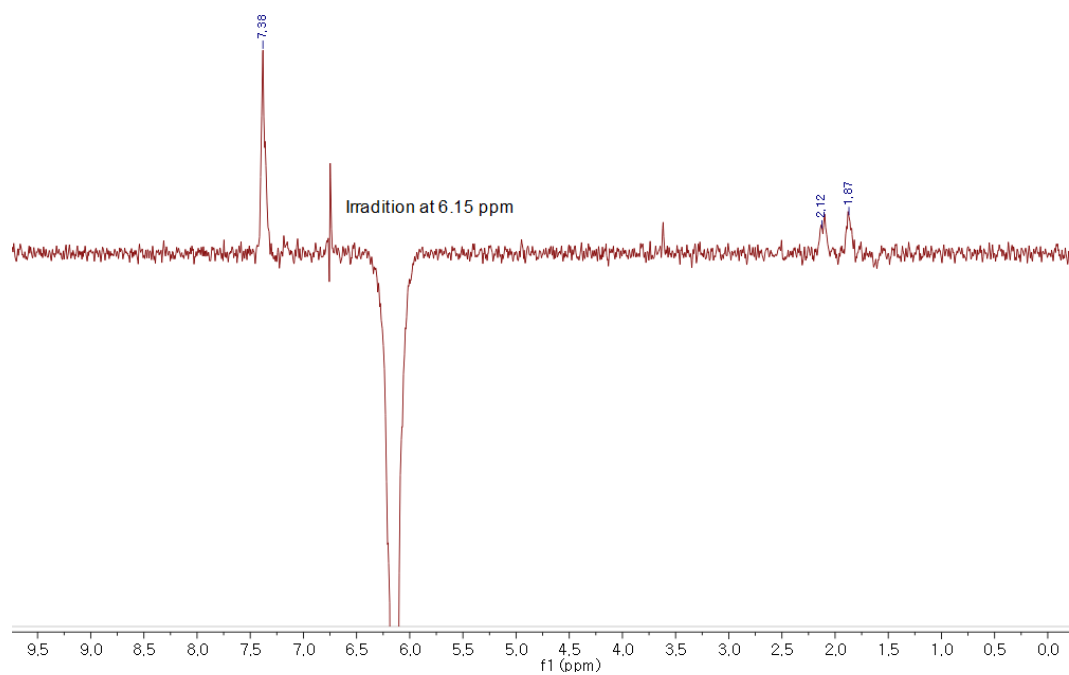

**Figure S78.** NOE spectrum of (R)-MTPA ester of **3b**.

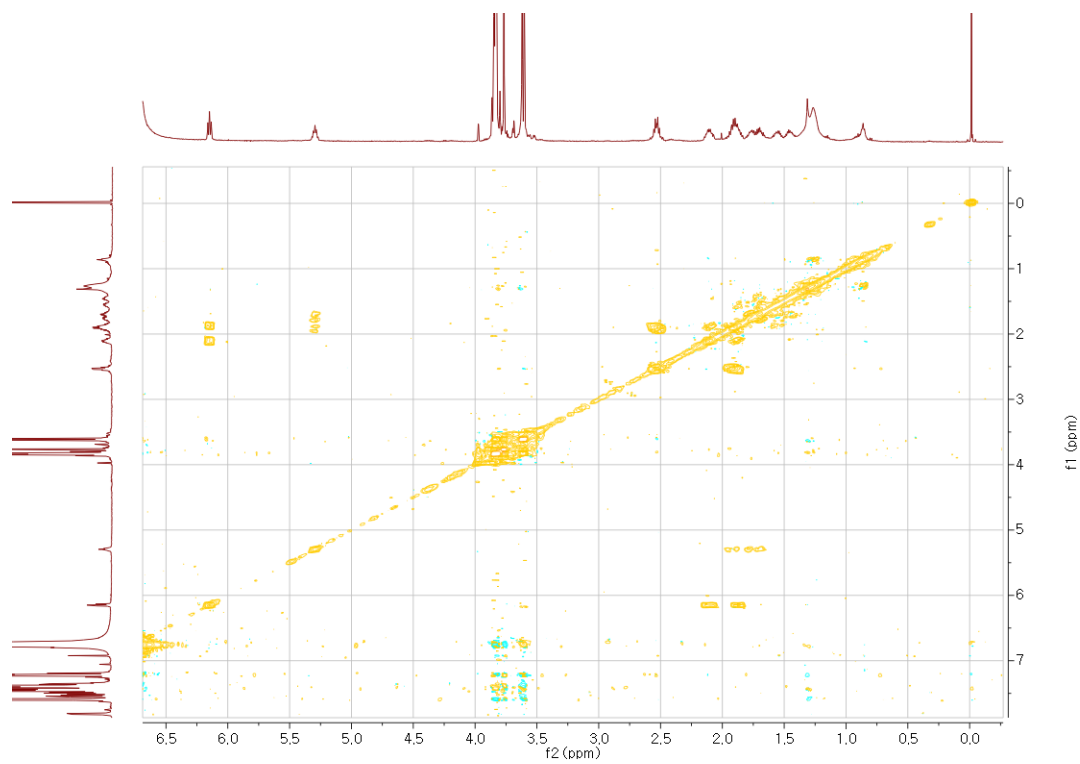

**Figure S79.** COSY spectrum of (R)-MTPA ester of **3b**.

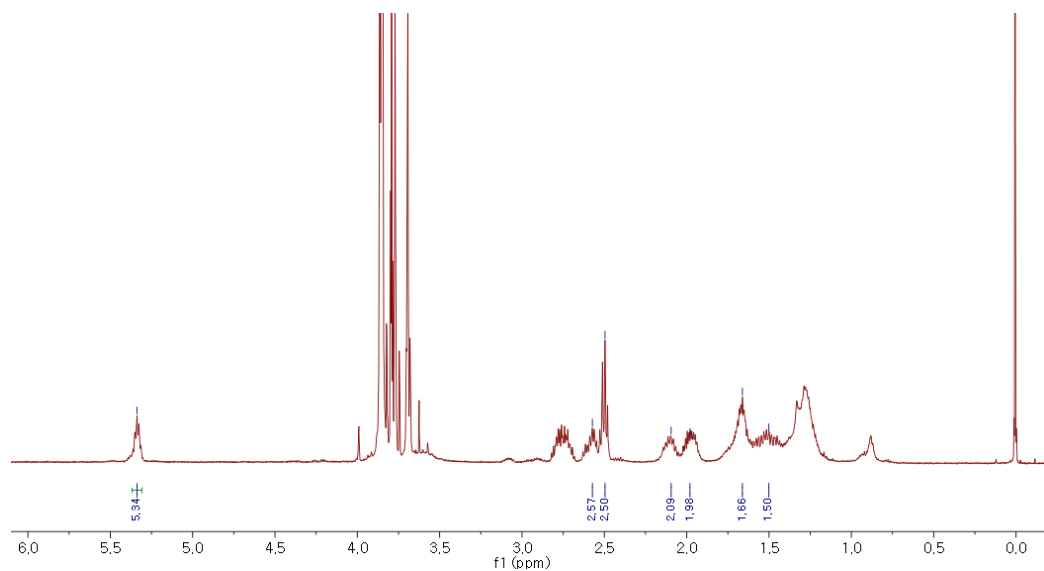

**Figure S80.**  $^1\text{H}$ -NMR (pyridine- $d_5$ , 500 MHz) spectrum of (S)-MTPA ester of **5**.

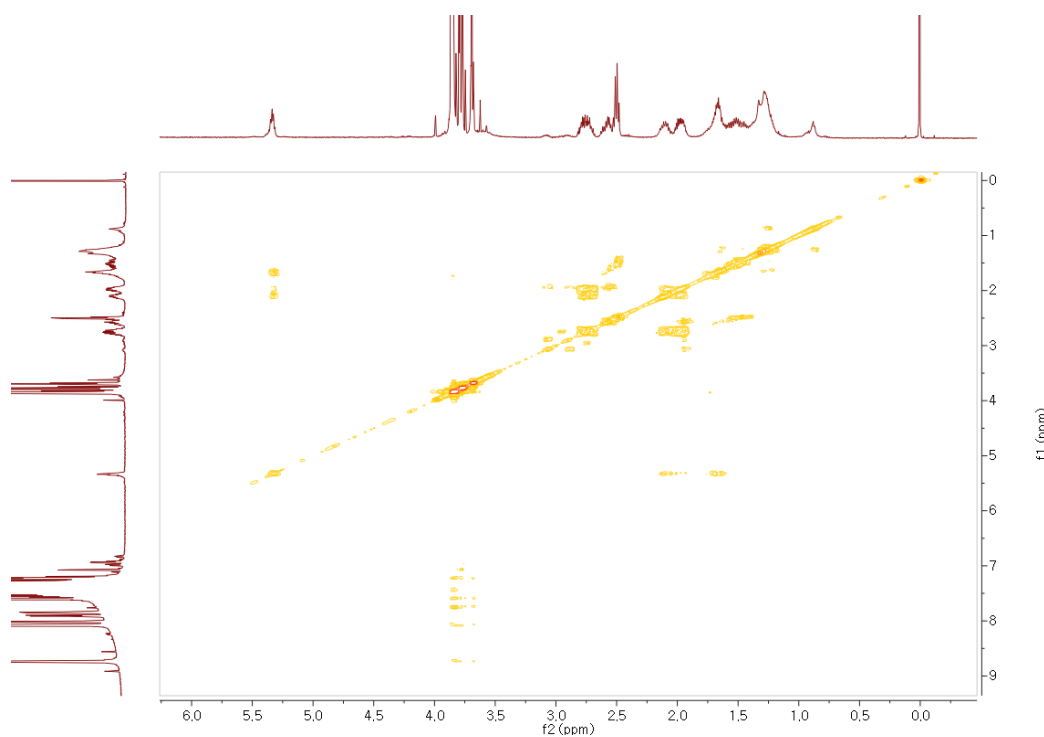

**Figure S81.** COSY spectrum of (S)-MTPA ester of **5**.

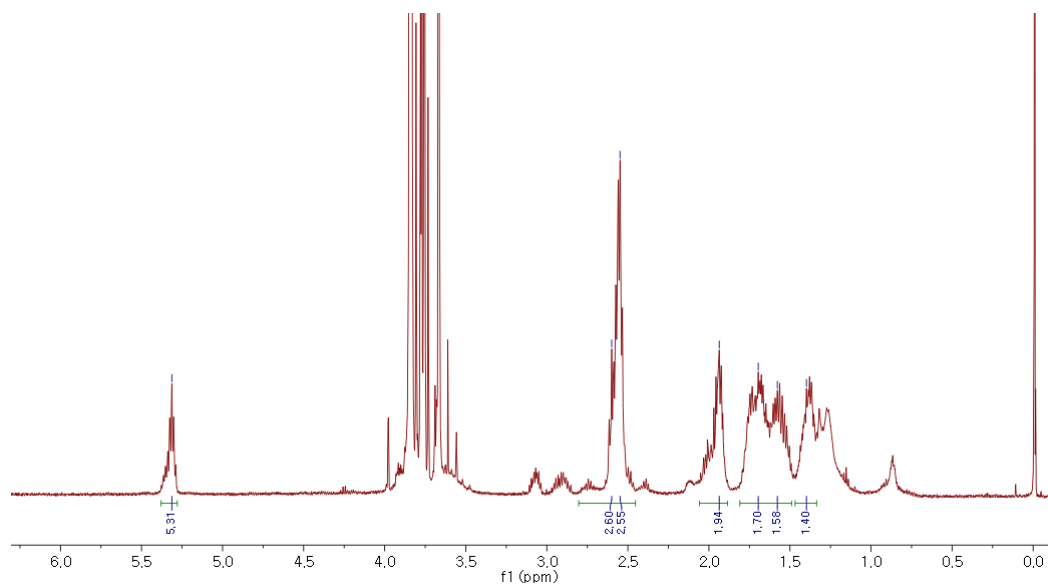

**Figure S82.**  $^1\text{H}$ -NMR (pyridine- $d_5$ , 500 MHz) spectrum of (*R*)-MTPA ester of **5**.

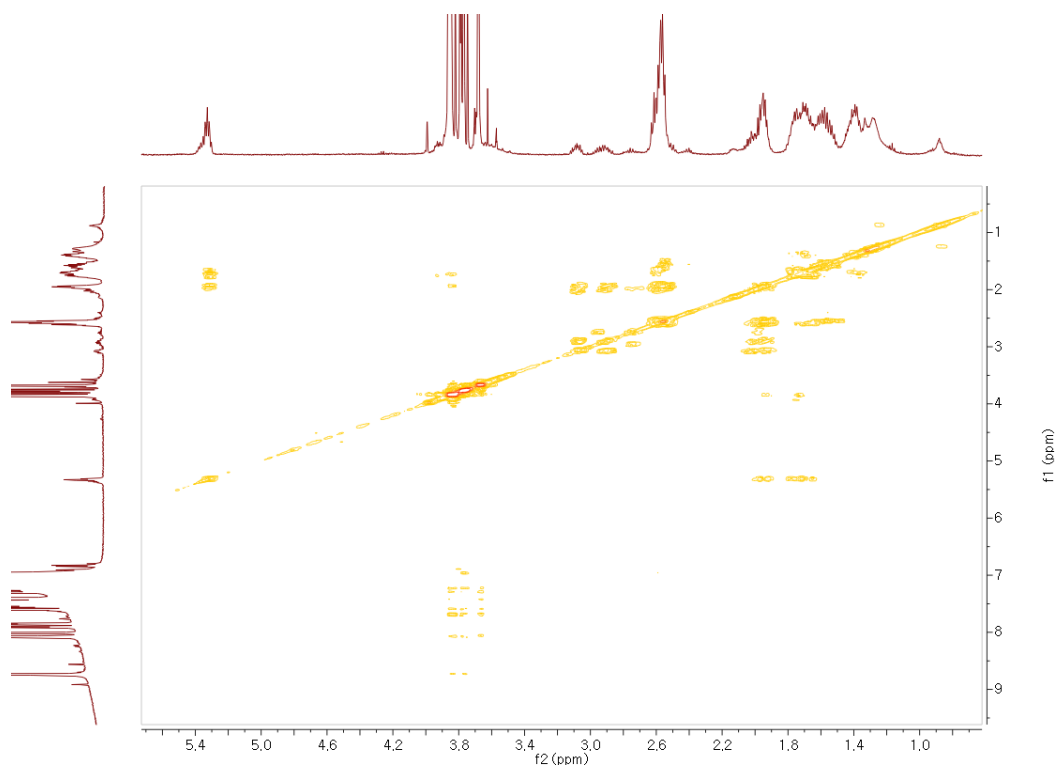

**Figure S83.** COSY spectrum of (*R*)-MTPA ester of **5**.

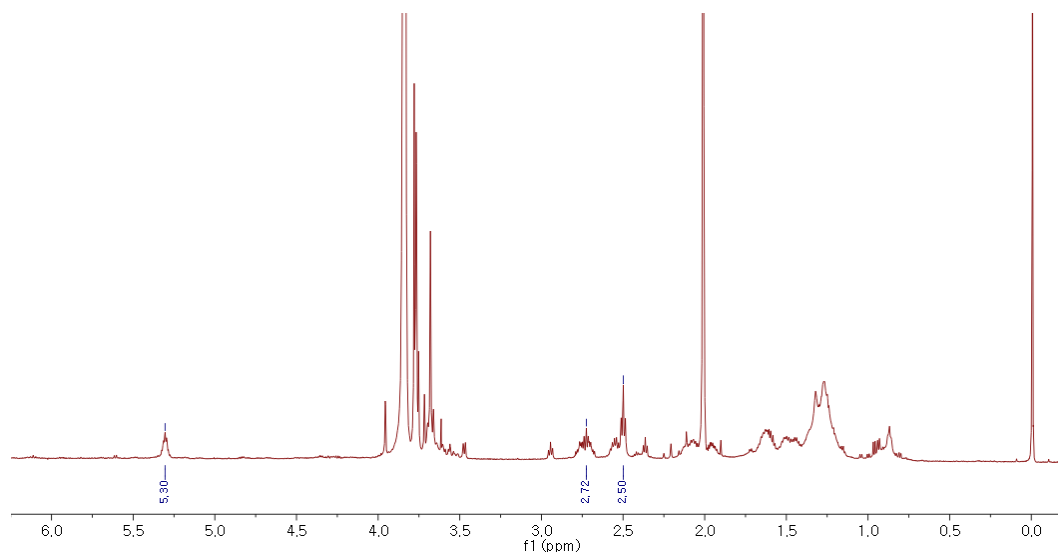

**Figure S84.**  $^1\text{H}$ -NMR (pyridine- $d_5$ , 500 MHz) spectrum of (S)-MTPA ester of **6**.

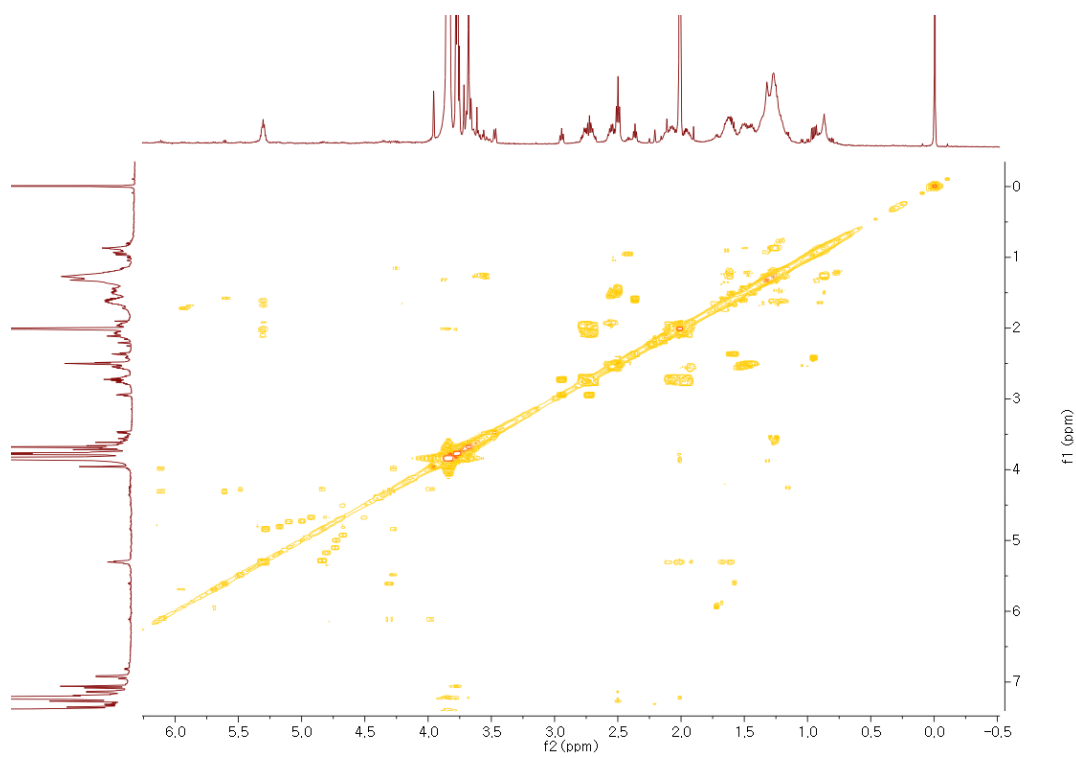

**Figure S85.** COSY spectrum of (S)-MTPA ester of **6**.



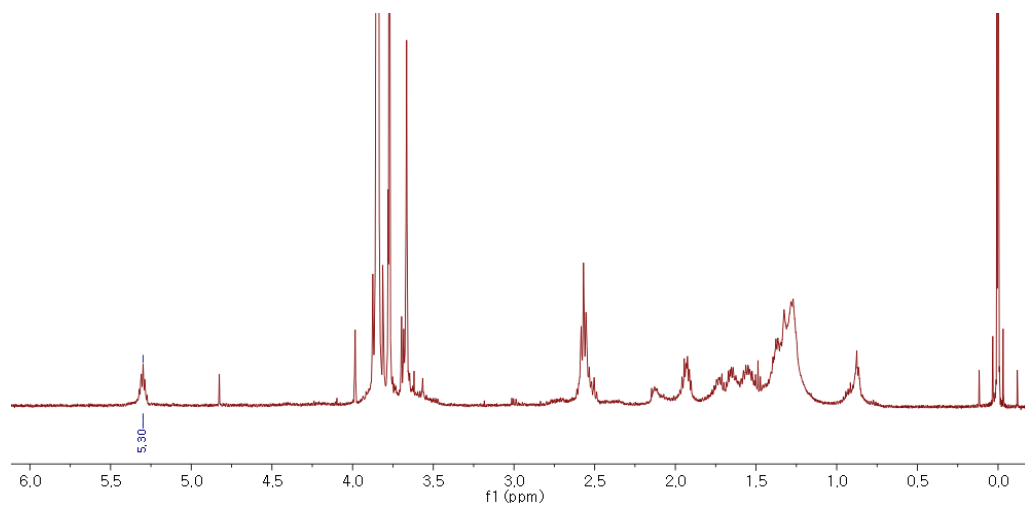

**Figure S86.**  $^1\text{H}$ -NMR (pyridine- $d_5$ , 500 MHz) spectrum of (*R*)-MTPA ester of **6**.

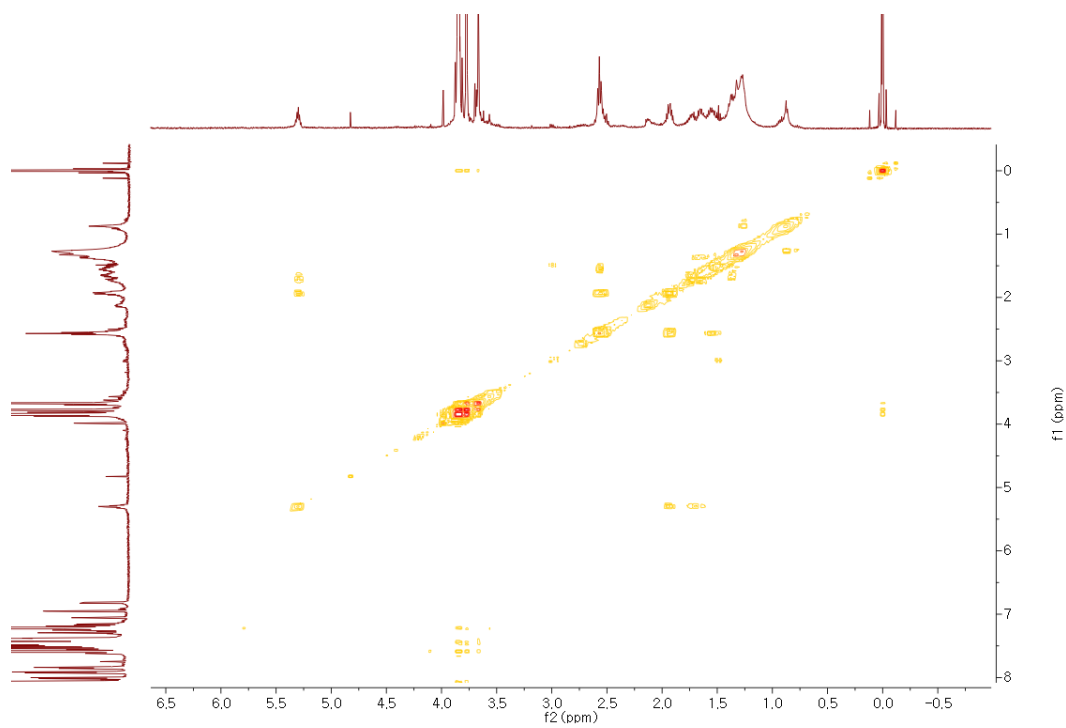

**Figure S87.** COSY spectrum of (*R*)-MTPA ester of **6**.

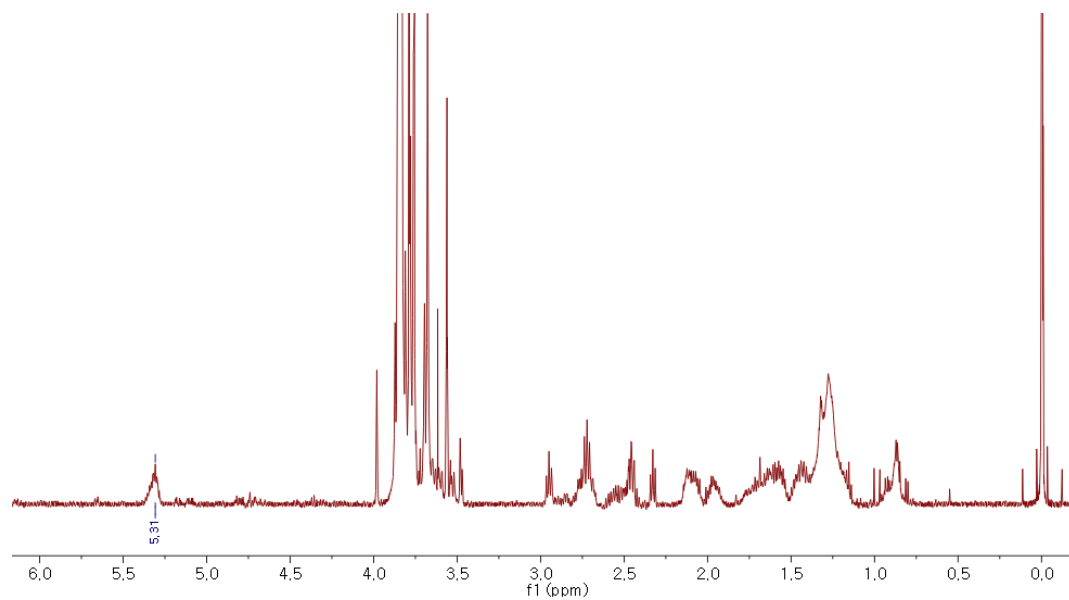

**Figure S88.**  $^1\text{H}$ -NMR (pyridine- $d_5$ , 500 MHz) spectrum of (S)-MTPA ester of **7**.

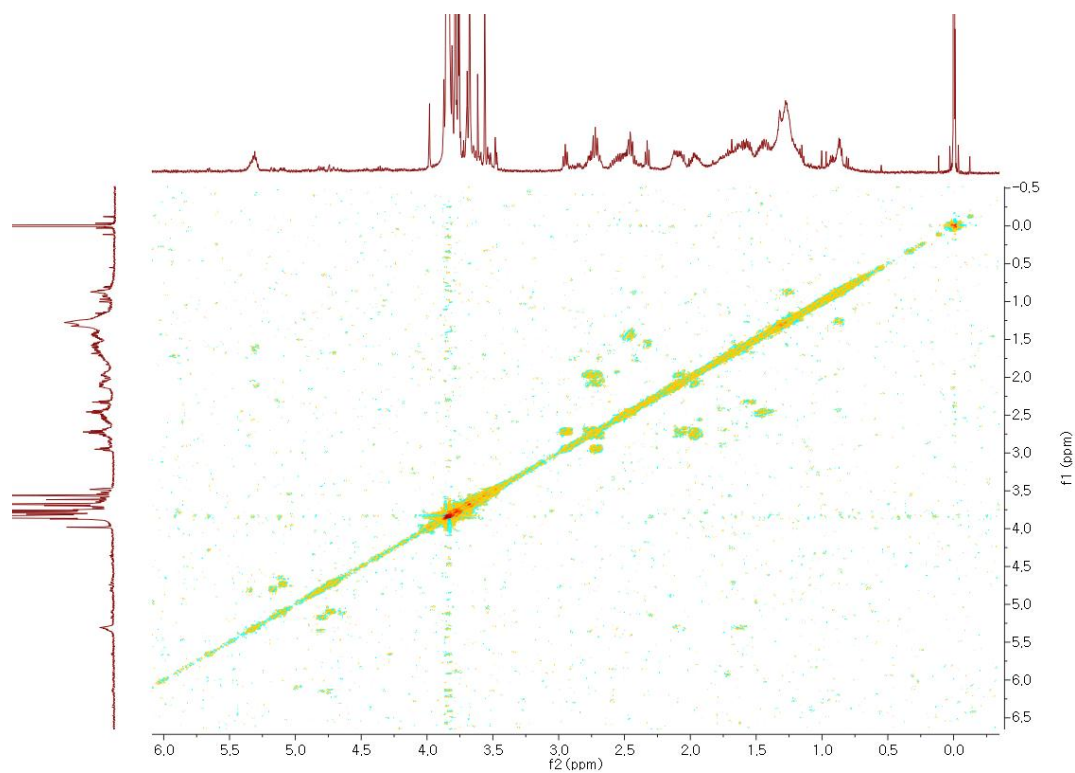

**Figure S89.** COSY spectrum of (S)-MTPA ester of **7**.

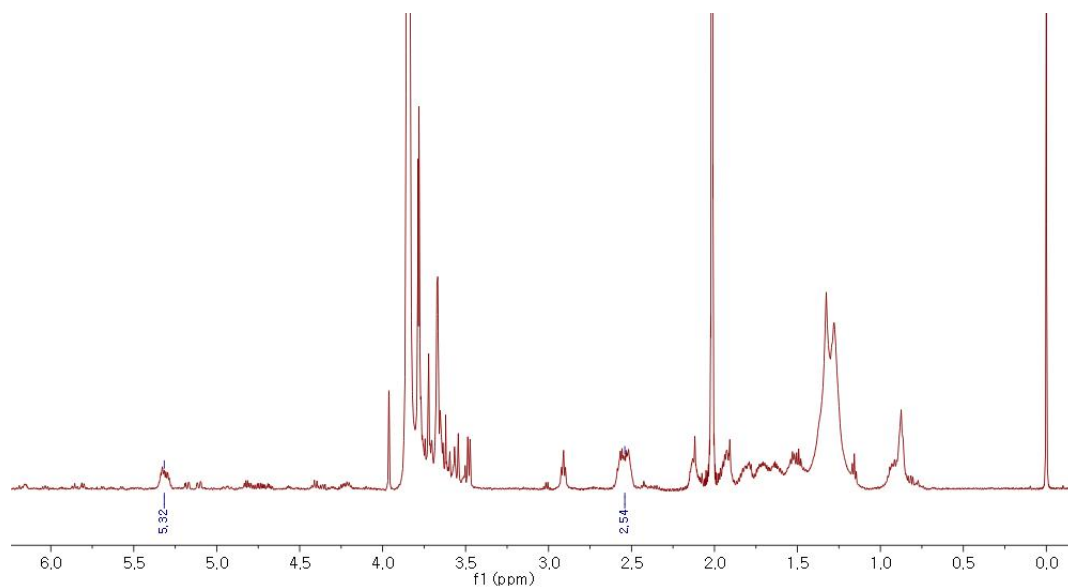

**Figure S90.**  $^1\text{H}$ -NMR (pyridine- $d_5$ , 500 MHz) spectrum of (*R*)-MTPA ester of **7**.

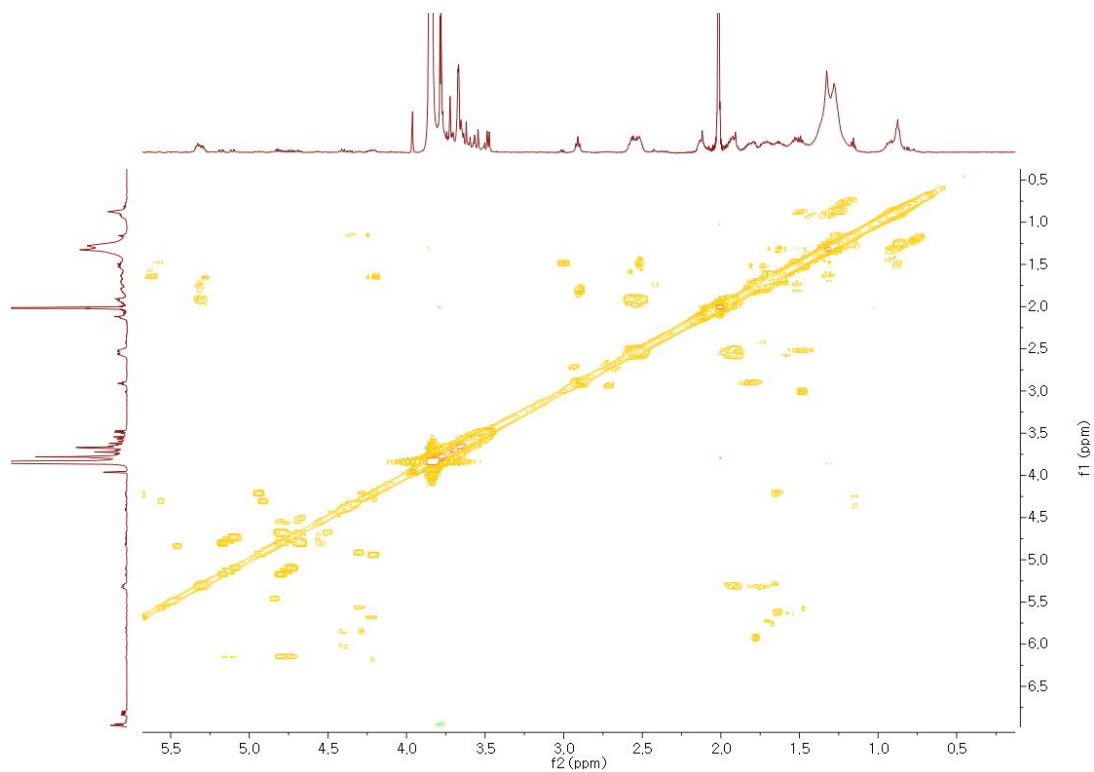

**Figure S91.** COSY spectrum of (*S*)-MTPA ester of **7**.
